# Supplementary material for: A two-locus interaction causes interspecific hybrid weakness in rice
Source: PubMed Central journal article supplement — Nat Commun. 2014 Feb 21;5:3357. doi: 10.1038/ncomms4357 (PMC3948059; doi:10.1038/ncomms4357), 2014-02-21
Supplement: ncomms4357-s1.pdf [file ncomms4357-s1.pdf]

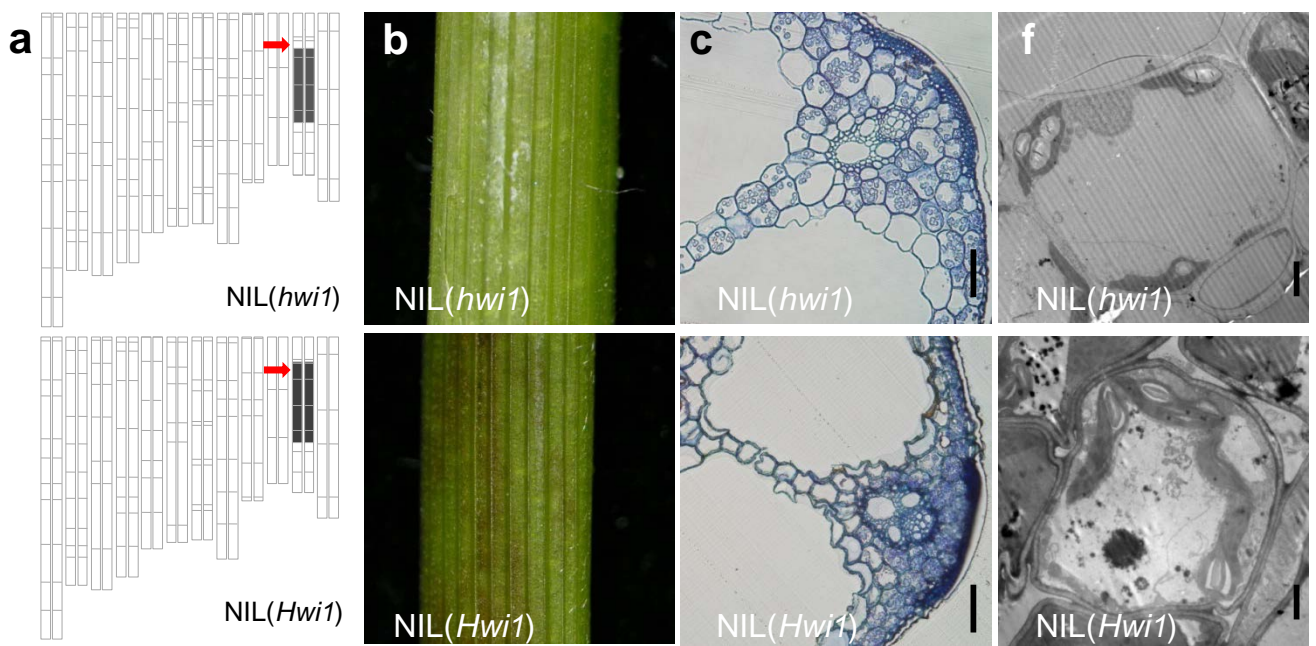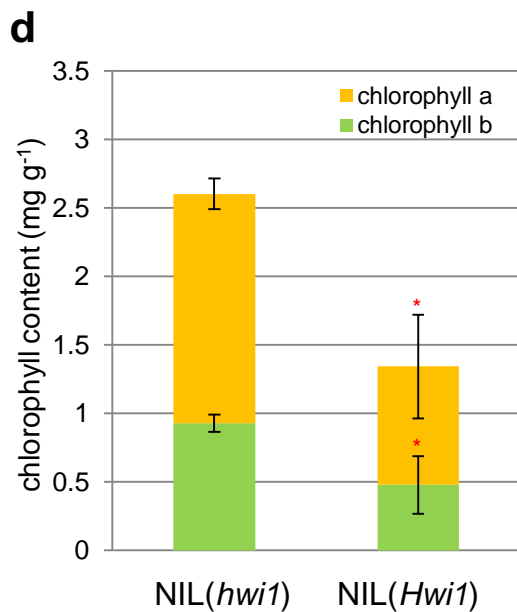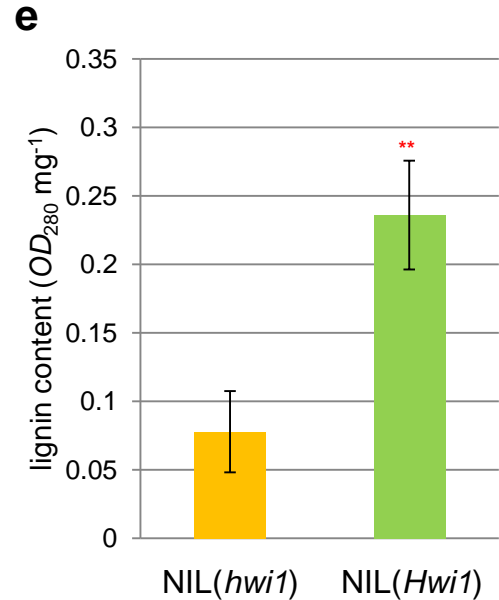

**Supplementary Figure 1. Morphological and physiological characteristics of the leaf sheath of NIL(*hwi1*) and NIL(*Hwi1*).** (a) Diagrams showing the genotype of NIL(*hwi1*) (upper panel) and NIL(*Hwi1*) (lower panel). Open bars indicate Teqing chromosomes; black bars indicate the introgression segments from wild rice; markers for genotyping are shown as grey horizontal lines; red arrows indicate the location of *Hwi1*. (b) Morphology of the leaf sheath of NIL(*hwi1*) (upper panel) and NIL(*Hwi1*) (lower panel). (c) Cross sections of the leaf sheath of NIL(*hwi1*) (upper panel) and NIL(*Hwi1*) (lower panel). Scale bar, 50  $\mu\text{m}$ . (d) Chlorophyll content of leaf sheaths. (e) Lignin content of leaf sheaths. (f) Parenchymal cells from leaf sheath of NIL(*hwi1*) (upper panel) and NIL(*Hwi1*) (lower panel). Scale bar, 2  $\mu\text{m}$ . Error bars in (d) and (e) indicate standard deviation,  $n=3$ . \* and \*\* indicate significant difference determined by the *t*-test at  $p<0.05$  and  $p<0.01$ , respectively.

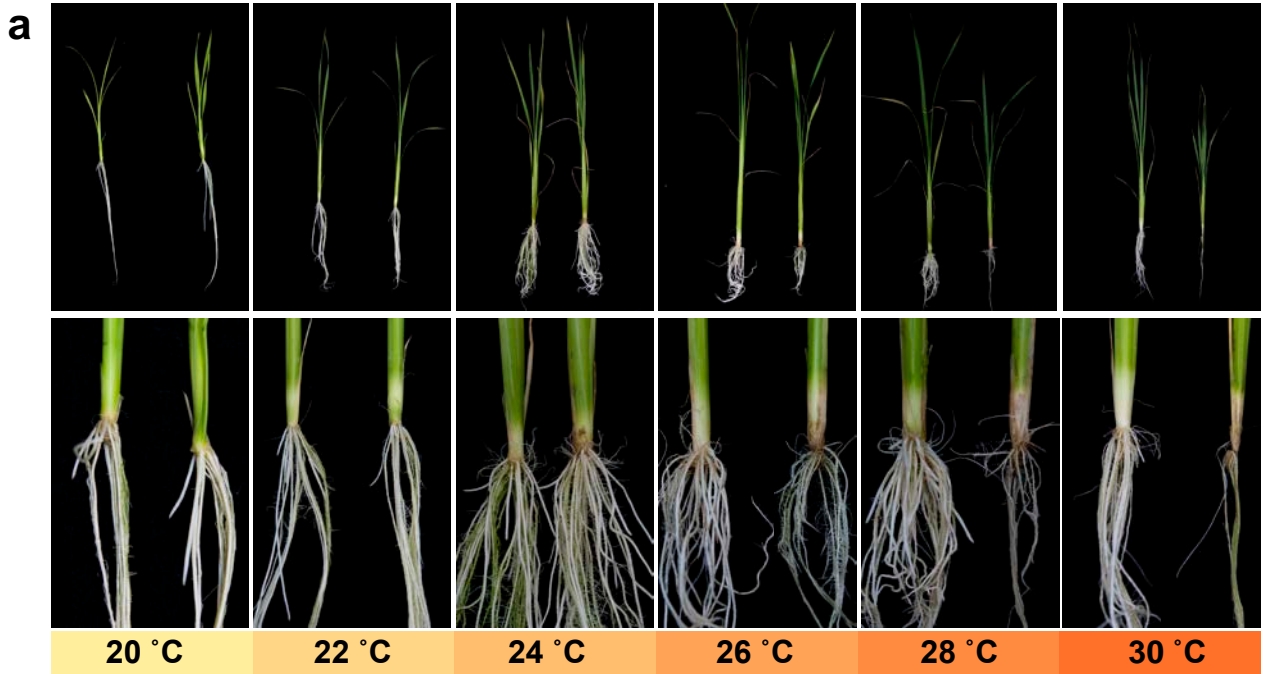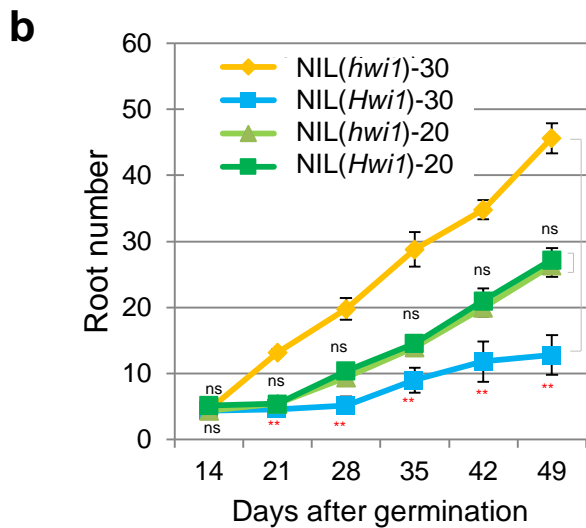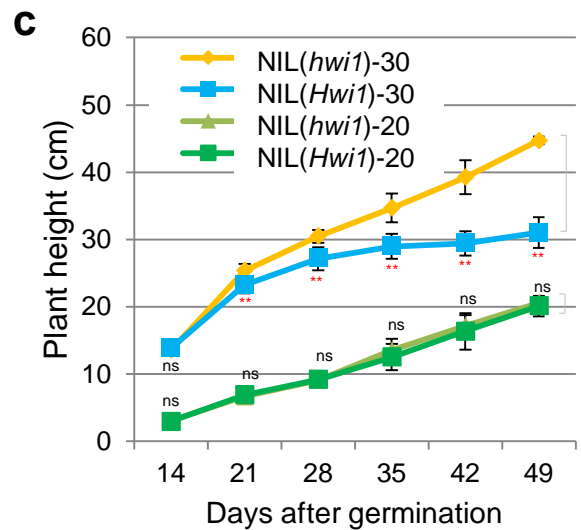

**Supplementary Figure 2. Effect of temperature on inducing the expression of hybrid weakness.** (a) Morphology of NIL(*hwi1*) (left in each picture) and NIL(*Hwi1*) (right in each picture) under various temperature conditions. Upper panels show the phenotypes of whole plants, lower panels show the amplifications of basal nodes and roots. (b, c) Time-course measurements of root number (b) and plant height (c) of 30°C-incubated plants. Error bars indicate standard deviation,  $n = 15$ . \*\*, significant difference determined by the  $t$ -test at  $p < 0.01$ ; ns, not significant.

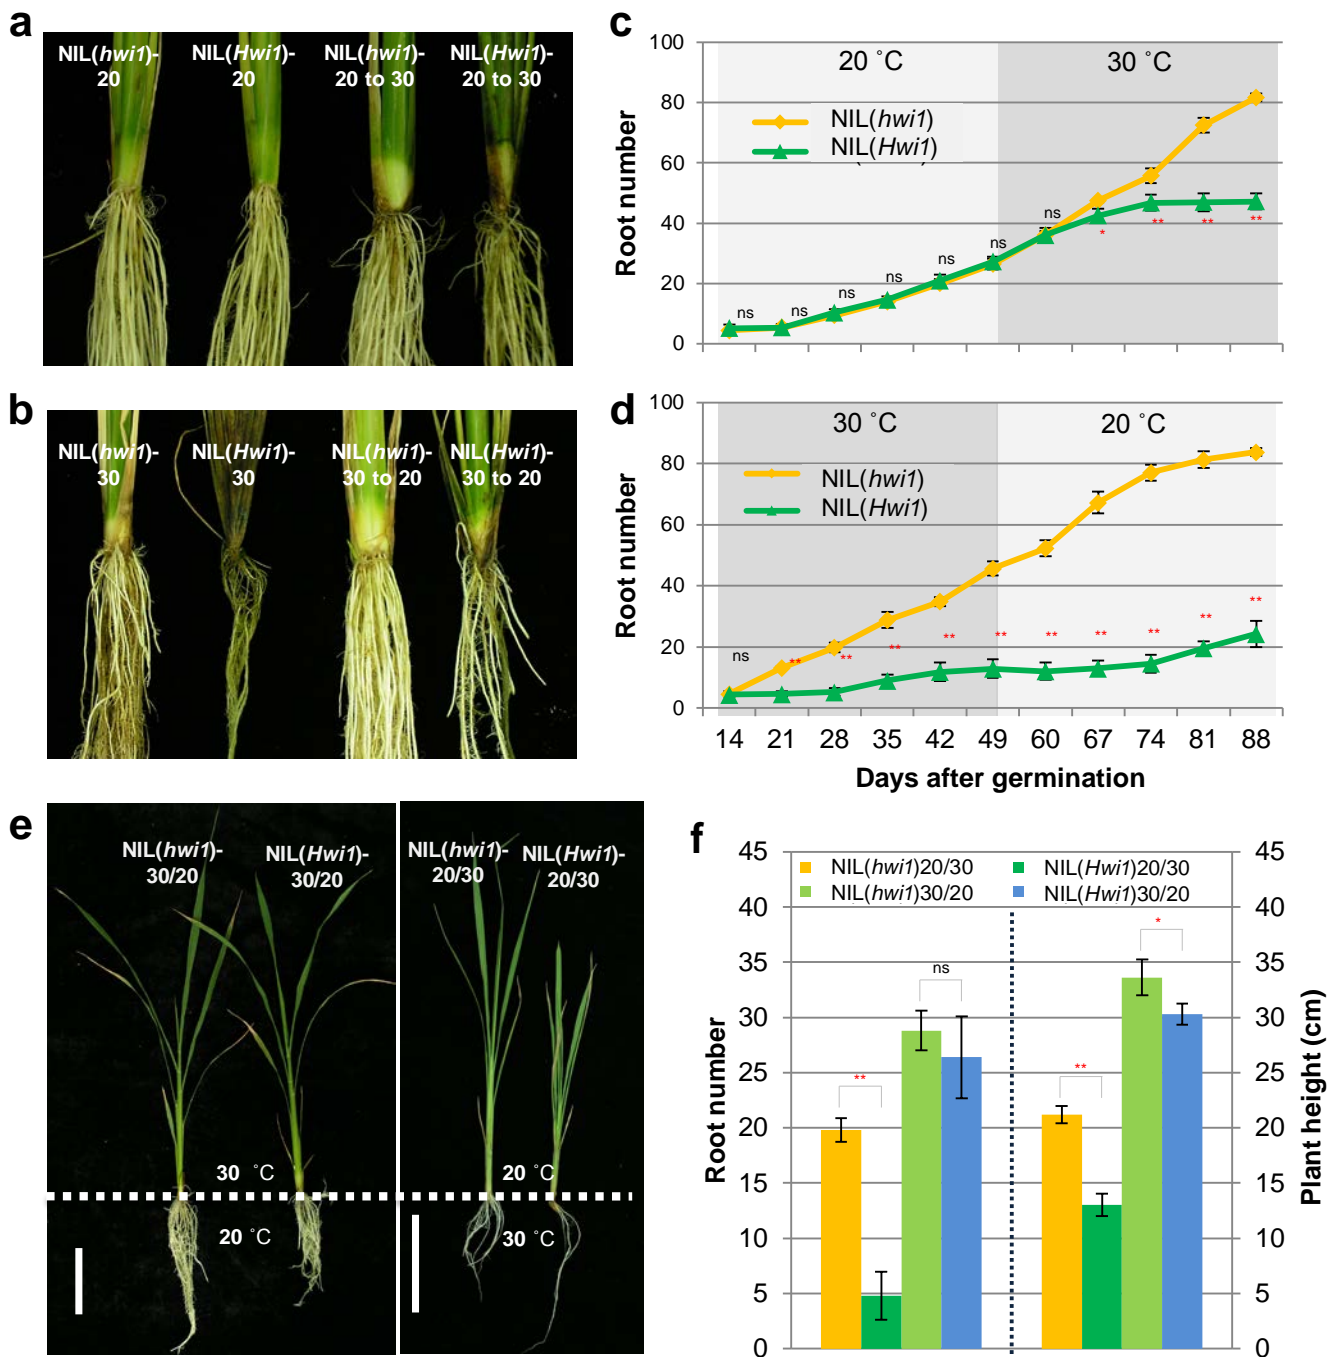

**Supplementary Figure 3. Temperature shift experiment and different root/shoot temperature treatment assay. (a, b)** Phenotypes of 88-day-old NIL(*hwi1*) and NIL(*Hwi1*) plants grown under consistent or shifted temperature conditions. “20” and “30” indicate that plants were grown under consistent 20° C and 30° C conditions. “20 to 30” and “30 to 20” indicate that the temperature was changed from 20° C to 30° C or from 30° C to 20° C at 7 weeks after germination. **(c, d)** Time-course analysis of root number of NIL(*hwi1*) and NIL(*Hwi1*) in response to temperature-shift treatment. Light and dark grey backgrounds indicate consistent 20° C and 30° C growing conditions in the temperature-shift experiments. **(e, f)** Phenotypes of 30-day-old NIL(*hwi1*) and NIL(*Hwi1*) seedlings incubated under different above- and under-ground temperature conditions. “30/20” and “20/30” indicate aboveground/underground temperatures of 30° C/20° C and 20° C/30° C, respectively; scale bar = 5cm in **(e)**. Error bars in **(c)**, **(d)** and **(f)** indicate the standard deviation,  $n = 10$ . \* and \*\* indicate significant difference determined by the  $t$ -test at  $p < 0.05$  and  $p < 0.01$ , respectively; ns, not significant.

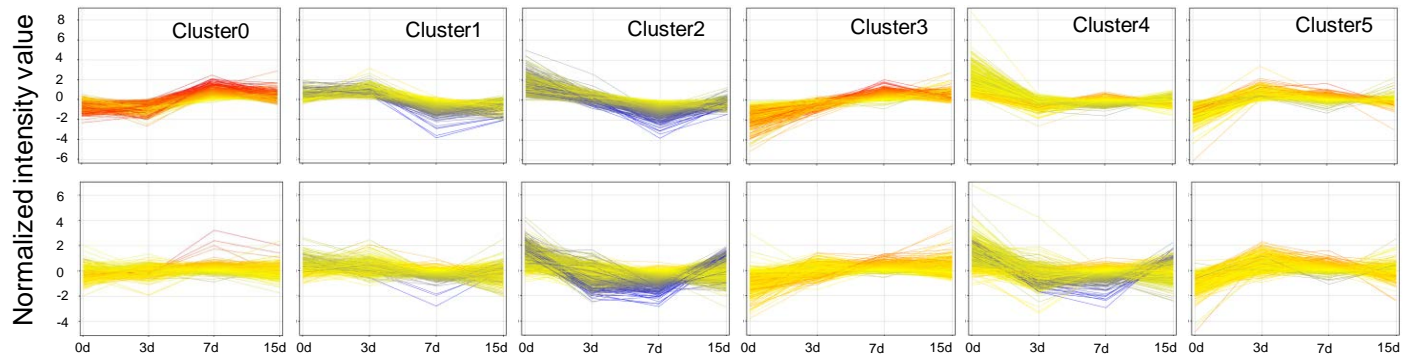

**Supplementary Figure 4. K-means analysis of differentially expressed genes.** Clusters of differentially expressed genes in the basal nodes of NIL(*HwiI*) (upper panels) and the expression of corresponding genes of each cluster in NIL(*hwiI*) (lower panel).

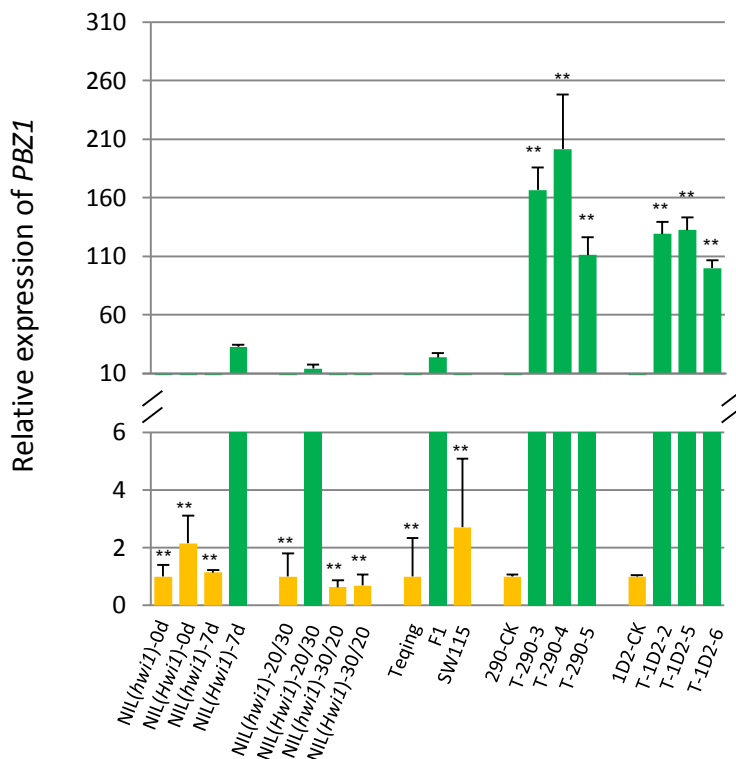

**Supplementary Figure 5. Activation of *PBZ1* associates with the expression of hybrid weakness.** 0d and 7d indicate the zero-point and 7 days after switching from 20° C to 30° C; 20/30 and 30/20 indicate aboveground/underground temperatures of 20° C/30° C and 30° C/20° C, respectively; F1 indicates the F1 hybrids of Teqing and SW115; T-290s and T-1D2s are independent transgenic lines with the Teqing allele of *Hwi2* in the HW background and with the wild rice allele of *Hwi1* in the Teqing background, respectively. Plants showing weakness syndrome are labelled in green. Error bars indicate standard deviation,  $n=3$ . \*\*, indicates significant difference between the corresponding weakness plants and the normal control plants determined by the  $t$ -test at  $p<0.01$ .

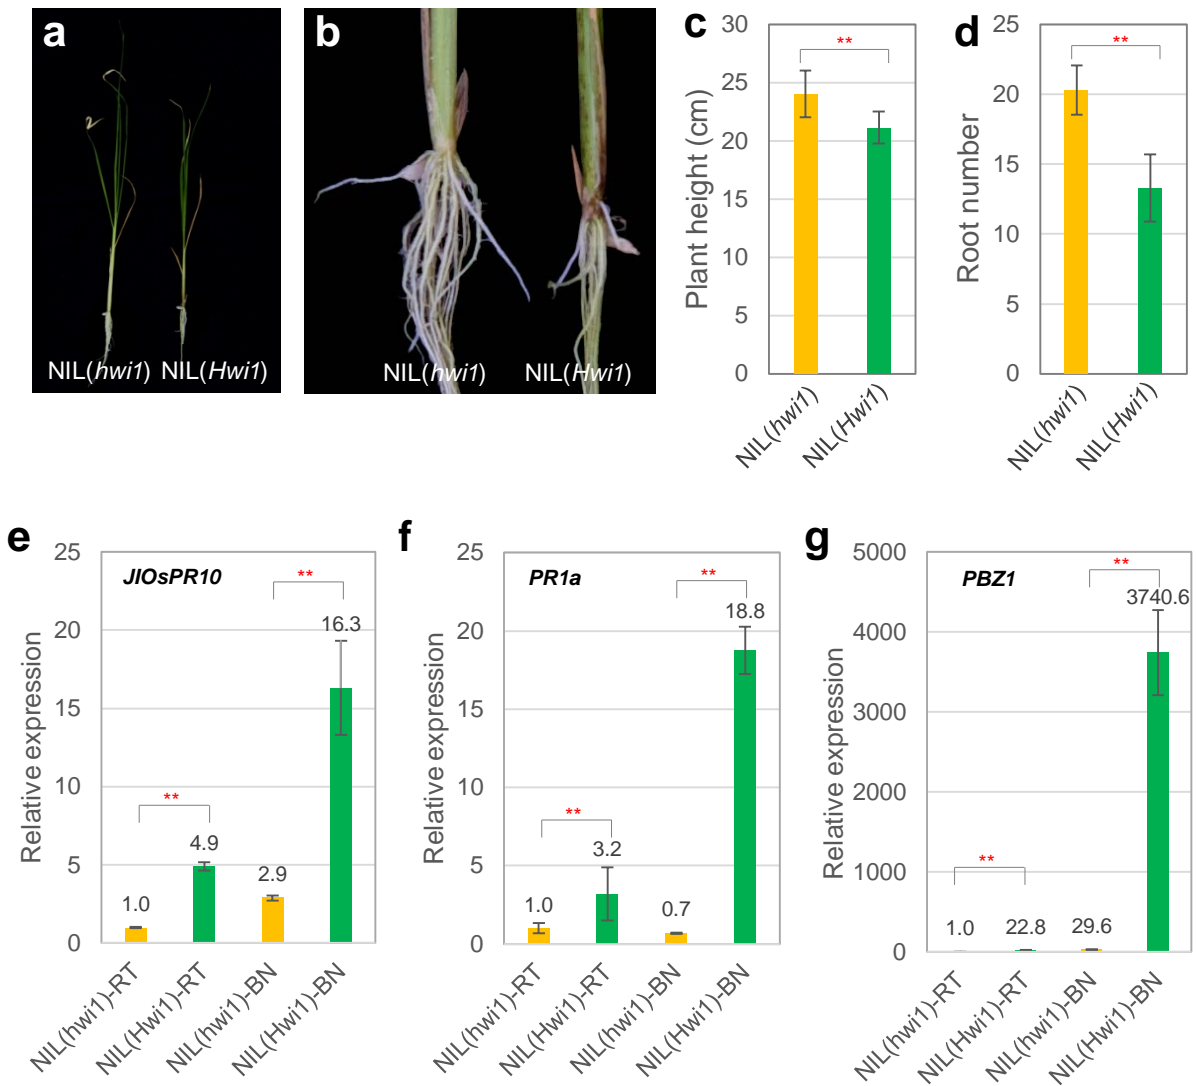

**Supplementary Figure 6. Phenotypic characterization and *PR* genes expression in sterile growth condition.** (a-d) Phenotypes of NIL(*hwi1*) and NIL(*Hwi1*) grown in sterile medium. \*\*, significant difference determined by the *t*-test at  $p < 0.01$ ; error bars indicate standard deviation;  $n = 10$ . (e-g) Relative expression of *PRs* in sterily grown NIL(*hwi1*) and NIL(*Hwi1*). RT, root; BN, basal nodes; \*\*, significant difference determined by the *t*-test at  $p < 0.01$ ; error bars indicate standard deviation;  $n = 3$ .

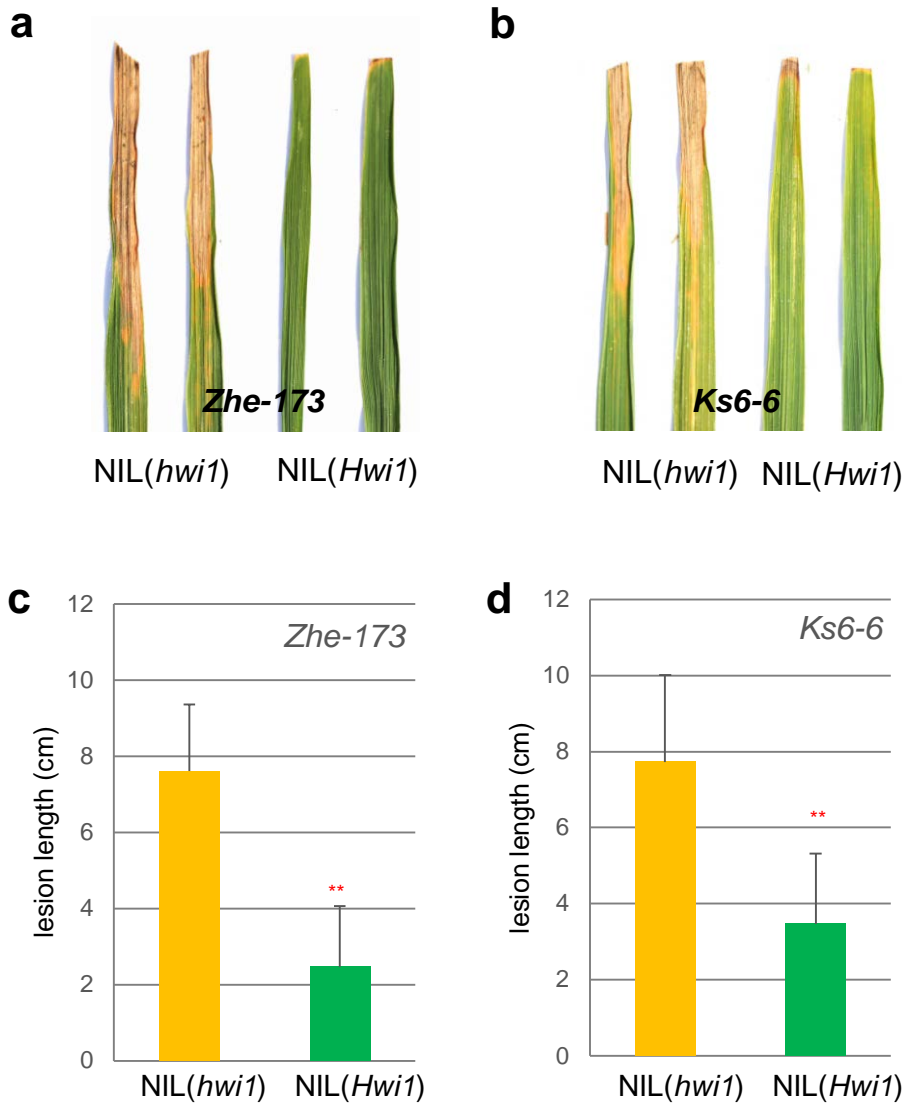

**Supplementary Figure 7. Inoculation assay at tillering stage.** (a,b) Phenotype of infected leaves of NIL(*Hwi1*) and NIL(*hwi1*) after 1-week inoculation of *Xoo* strains Zhe-173 (a) and Ks6-6 (b). (c, d) Lesion length of infected leaves. Error bars indicate standard deviation,  $n = 15$ . \*\*, significant difference determined by the  $t$ -test at  $p < 0.01$ .

25 1 MKVTTASGHLLVLFASIFHPAVSSISGNGTDRLALLEFKNAITHDPOKSLMSWNDSNHLCSWEGVSCSSKNPPRVTSID 80  
 25L1 1 MKVTTTAGHFLVLFASISHSVICSTSGNETGRLLLEFKNAISVDPHQALISWNDSHFCSWEGVSCSSKNPPRVTSID 80  
 25L2 1 MKVTTTAGHFLVLLASISHSVICSTSGNETDRLSLEFKNAISVDPHQALISWNDSHFCSWEGVSCSSKNPPRVTSID 80  
  
 25 81 LSNQNLAGNISPSLGNLTFLKHLSLATNEFTGRIPESLGHRLRRLRSLYLSNNTLQGIIPSFANCSDLRVLWLDHNELTGG 160  
 25L1 81 LSNQDLAGNISPSLGNLTFLRNLSLATNRFTQCIIPASLCHLSSLRSLYLSNNTLQGNIPSFANCSDELRLWLDHNLGGG 160  
 25L2 81 LSNQDLAGVISPISLGNLTFLKHLSLVKNSTFKQIPASLGHRLRRLQSLHLSNNTLQGIIPSFANCSGLRKLWLDHNEELAGE 160  
  
 25 161 LPDGLPLGLEELQVSSNTLVGTIPPISLGNVTILRMLRFANFNGIEGGIPGELAAALREMEILTIGCNRLSGGFPEPILMNSV 240  
 25L1 161 IPRDLPLGLEELDVSLSNLVGTIPPITLGNITIKLKMFSCSINGINGGIPSELACLRGMEITLGVGMNLSGFFPEAILNMSA 240  
 25L2 161 FPGDLPLGLEELNLSLNNLVGTIPISLGNFTALKKLGCAFSGINGTVPSELAAALRVLEMLISIPGNRLSGAFPEAILNMSA 240  
  
 25 241 LIRLSLETNRFSGKMPGSGIGTSLPNLWRLFICGNFFQGNLPSSLANASNLVDLIDISQNFVGVVPAFVIGKLANLFWLNL 320  
 25L1 241 LVVLLGTKNHFSGELPSGIGNSLRNLLQLKISGNFFKGNLPSSLVNASNLVKVDMALNFTGVVPSFVKLANLFWLSLT 320  
 25L2 241 LVMLSLSSNRFSGMLPSGIGSSLPSLEQITICGNFFQGNLPSSLANASNLVWIDITENNFTGVVPTSIKLANLIKLSFQ 320  
  
 25 321 MNQLHARSKQDWFMDSLTINCTQLQALSMAGNQLGELHLPNSVGNFSVQLQRLYLGQNQLSGSFPSGIANLPLNLI 400  
 25L1 321 MNHLHAHASKQDWEFMDSLANCTQLQLFSIAVNRMEGQVPSLGNFSVQLKYLYLGQNQLSGSFPSGIANLPLNLI 400  
 25L2 321 TNQLHARSKQDWEFMDSLANCTQLQFFSISRNMQEGHVPSSLGNFSVQLQYLYLGQNQLSGNFPSGIANLPLNLI 400  
  
 25 401 NRFTGSVPPWLGGLITLQVLSLTINNFTGYIPSSLSNLSHLVLYLQSNQLLGNIPSSFGKQLFLTRIDISDNLNGLSP 480  
 25L1 401 NWFTGSVPPWLGGLKSLQMLDLSYNNFTGFVPSLSSNLSQLTBLNMDSNQFVGNIPLSFGNFQFLTITIAHNNLHGS 480  
 25L2 401 NRFTGFPVWLGGLKQLQMLSLTINNFTGYIPSSLSNLTQLTSLILESNQFIGNIPSSFGNLQFLTTLAISRNNLHGS 480  
  
 25 481 KEIFRIPITIAEVGFSSNNLSGELPTEVGYAKQLRSLHLSNNSLSDIPNTLGNCEQLQEVVLDONNFGSGIPASLGKLI 560  
 25L1 481 KEIFRIPITIEEVWFFSSNNLSGELIPTQVGNAKQLRNLQKKNLSGDIPTLGNCEQLQEVVLDONNFTGDI 560  
 25L2 481 KEIFRIPITLAQLGFAPNNSGELPAETGNAKNLWNLQSSNNSLSDIPNTLGNCEQLQEVVLDONNFGSDIPT 560  
  
 25 561 LKSLNLSHNILNGSIPVSLGDELELEQIDLSFNHLSGQVPTKGFKNSTATHMDGNLGLCGGAPLHLLPECP 640  
 25L1 561 LKFLDLSHNMLSGSIPVSLGELGRLELDLSDLSFNRLTGQVPTKGFKNSTATQIDGNLALCGGAPLHLLPECP 640  
 25L2 561 LRLGLSHNQLSGSIPASLGDQLQLLQIDLSFNHLTGQVPTKGFKNSTAMRIDGNMLCGGAPLHLLPECP 640  
  
 25 641 HKLYVTLKVVIPLASTVTLAIVILVLFIWKGRREKSI 720  
 25L1 641 RKLSVLLKVVIPLASTVTLAIVILVLFIWKGRREKSI 720  
 25L2 641 HKLSVVVKVVIPLAIVPLAIVILVLFIWKGRRTNSI 720  
  
 25 721 LFHDINAVAIVKFSLETRGAQKSFIAECNALRNVHRNRLVPI 800  
 25L1 721 LFQDLNVVAIVKFSLETRGAQKSFIAECNALRNVHRNRLVPI 800  
 25L2 721 LFQDLNVVAIVKFSLETRGAQKSFIAECSTLRNVHRNRLVPI 800  
  
 25 801 RSSGLCYISLAQRSLTAVDLSDALAYLHSHQGTIIHCDL 876  
 25L1 801 RSSDLCCISLAQRSLTAVDLSDALAYLHSHQGTIIHCDL 876  
 25L2 801 DASNLNHTTLAQRINIVVDVSDALEYLHSHQGTIIHCDL 880  
  
 25 877 TINGTIGYVAPECAIGGQVSTAADVSEFGVLELIFIRRRPT 956  
 25L1 877 TVNGTIGYVAPECAMGGQVSTAADVSEFGVLELIFIRRRPT 956  
 25L2 881 AIKGTIGYIAPCESEGGQVSTASDVSEFGVLELIFIRRRPT 960  
  
 25 957 EDPVRVDEIATHCLLSVLNIGLCCTKSSPSERISMQE 1007  
 25L1 957 EDPVQVDEIATHCLLSVLNIGLCCTKSSPSERISMQE 1007  
 25L2 961 ETPMAVKEKGVHCLRSVLNIGLCCTNTPSERISIQE 1013

**Supplementary Figure 8. Amino acid sequence alignment of *LOC\_Os11g07225* (abbreviated to 25), *LOC\_Os11g07225-like 1* (abbreviated to 25L1) and 25L2.**



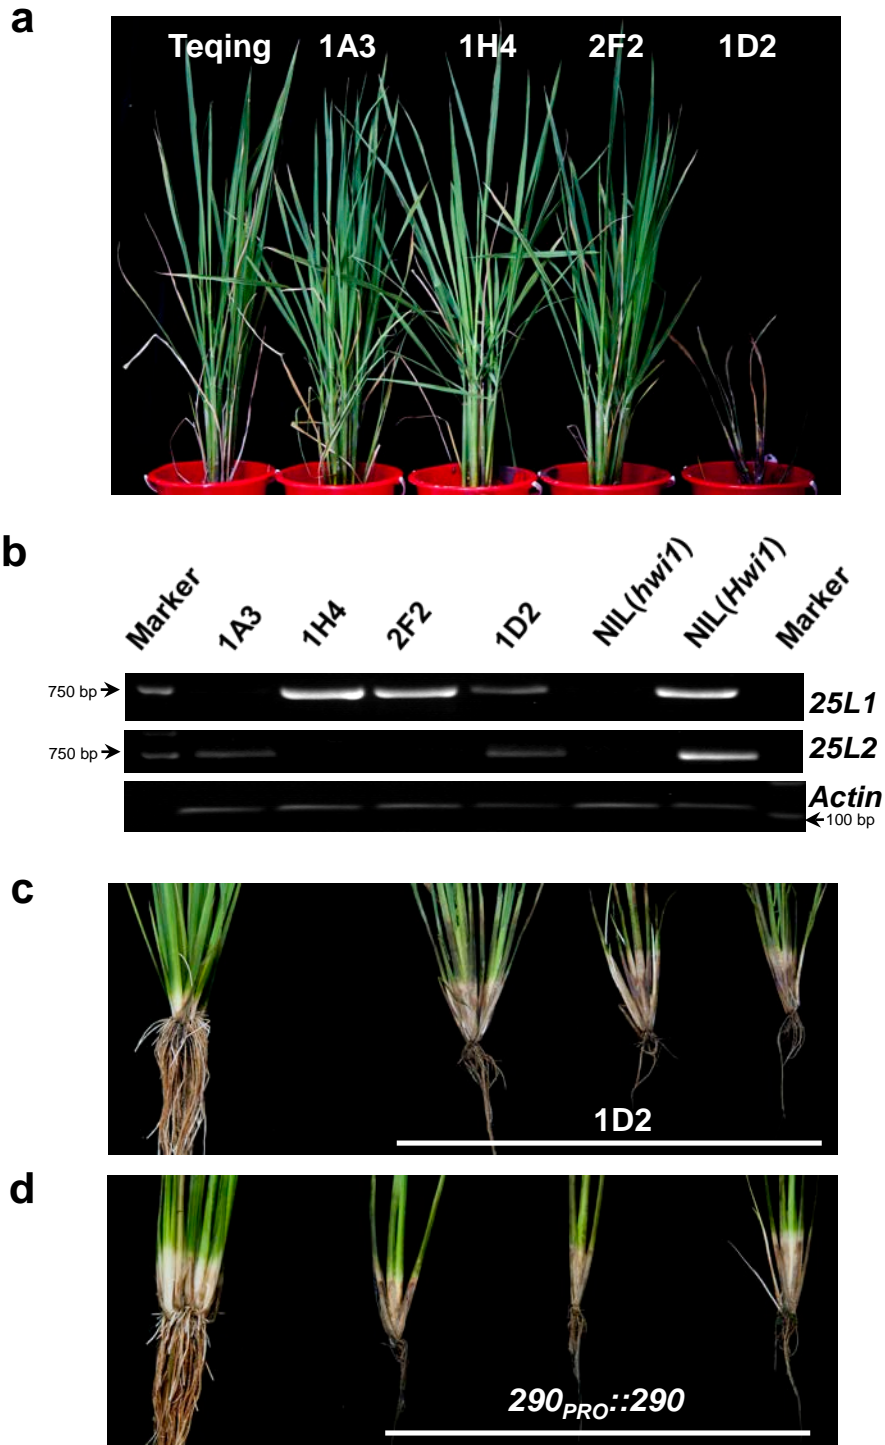

**Supplementary Figure 9.** Complementation tests of *Hwi1* and *Hwi2*. **(a)** Phenotypes of transformants with different genomic segments subcloned from wild rice BAC. **(b)** The expression of *25L1*, *25L2* in different transgenic lines. Marker sizes were labeled on left or right. **(c, d)** Morphologies of basal nodes and roots of *Hwi1* **(c)** and *Hwi2* **(d)** complemented transformants with the 1D2 segment from wild rice and the native promoter-driven 290 genomic sequence, respectively.

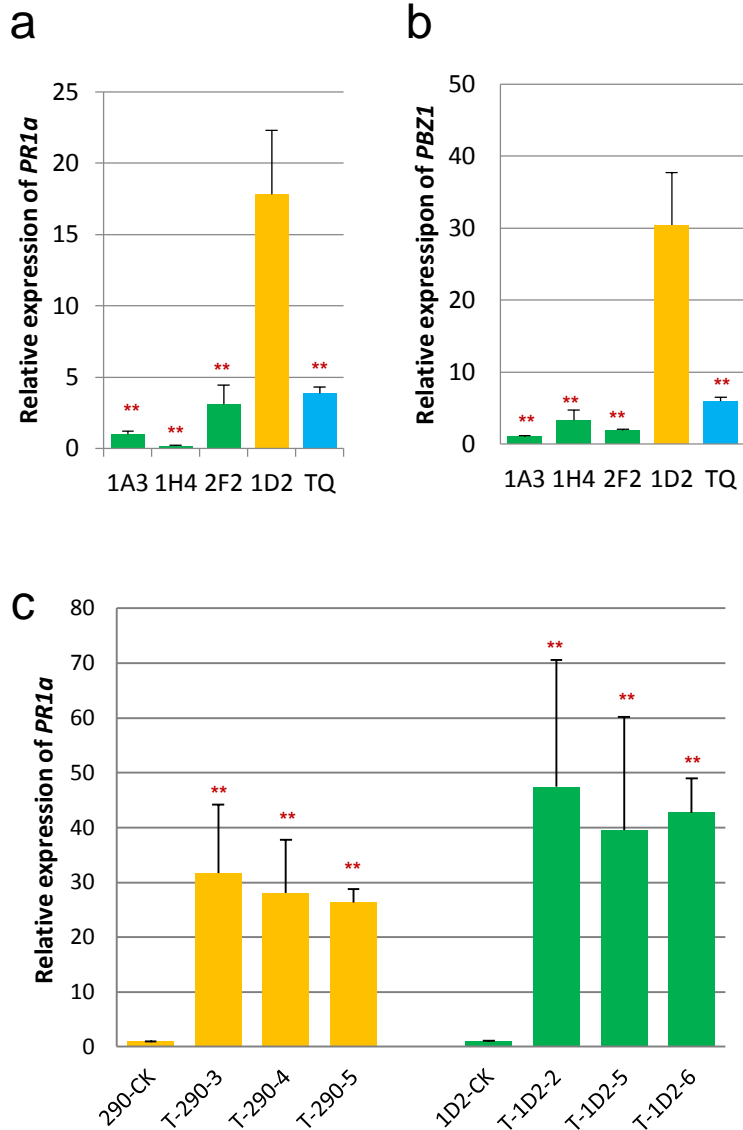

**Supplementary Figure 10. The expression of PRs in transgenic lines.** (a, b) The expression of *PR1a* (a) and *PBZ1* (b) in transformants carrying different wild rice segments at the *Hwil* locus. Error bars indicate standard deviation,  $n = 3$ . \*\* indicates significant difference between the transgenic plants with and without weakness syndrome that determined by the  $t$ -test at  $p < 0.01$ . (c) The expression of *PR1a* in independent 290 and 1D2 complementation lines. Error bars indicate standard deviation,  $n = 3$ . \*\* indicates significant difference between the weakness transgenic plants and the corresponding control that determined by the  $t$ -test at  $p < 0.01$ . Yellow color indicates the 290*PRO*::290 transgenic lines and the control; green colour indicates the 1D2 transgenic lines and the control.

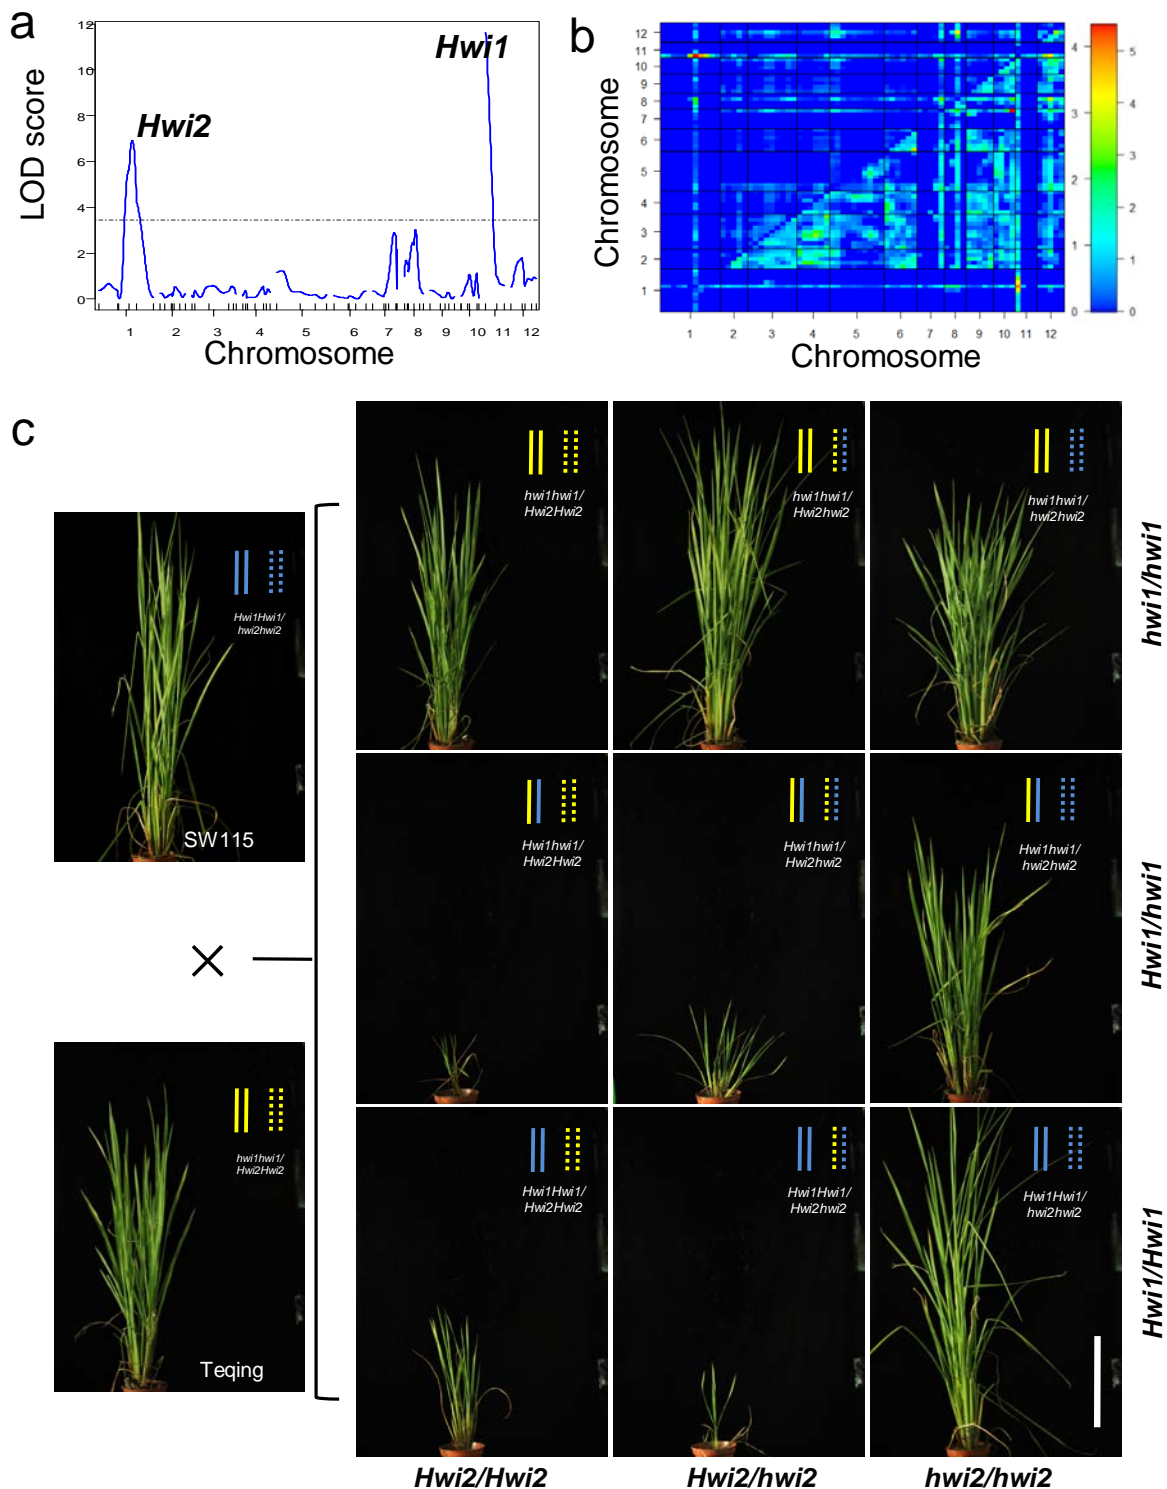

**Supplementary Figure 11. QTL mapping and genetic verification of *Hwi2*.** (a) QTL mapping using 96 individuals in an  $F_2$  population derived from a cross between NIL(*Hwi1*) and Zhonghua 11 (*O. sativa* ssp. *japonica*) revealed two loci regulating the expression of hybrid weakness. Dashed line delineates the significance threshold ( $p = 0.05$ , simulated by 1,000 permutations); tick marks on the X-axis indicate marker positions. (b) Heat map of two-dimensional genome scan with a two-QTL model for maximum joint LOD (upper triangle) and interaction LOD (lower triangle) scores. Colour-coded scale indicates values for epistatic interaction on the left and joint LOD score on the right. (c) Phenotypes of different genotype individuals in Teqing/SW115-derived  $F_2$  population. Plants shown in the same row and column share the same genotype at the *Hwi1* and *Hwi2* locus, respectively.

|                       |     |                                                                                         |     |
|-----------------------|-----|-----------------------------------------------------------------------------------------|-----|
| <i>Maize</i>          | 1   | MA LCSMRA --HLA LLLCFCLLLSGVNGRSR -KTYIVYLGVDVKHEHPNDVI ASHHDMLTAVLRSKEDT LDSI IHNYKHGF | 77  |
| <i>Sorghum</i>        | 1   | MGLHSSTRACVALA LLLCFCTVSLGAHGGRSRLYIVYLGVDVRHGHPDEVI ASHHDLLATVLSKEDSLASMT HNYKHGF      | 80  |
| <i>O. sativa</i>      | 1   | MILHSPFQR-FPAFL LLLCFVWLM-IRGIYGRKLYIAYLGEKKYDDPTLV TASHHDMLT SVLGSKEEALAS IAYSYKHGF    | 78  |
| <i>O. glaberrima</i>  | 1   | MILHSPFQR-FPAFL LLLCFVWLM-IRGIYGRKLYIAYLGEKKYDDPTLV TASHHDMLT SVLGSKEEALAS IAYSYKHGF    | 78  |
| <i>O. brachyantha</i> | 1   | MTLHSSRS-FPAY LLLFWLCLLM-IRGTYGRKLYIVYLGEEKHDDPTLI TASHHDMLSKVLSGKEEALAS IAYSYKHGF      | 78  |
| <i>Barley</i>         | 1   | MDFHSSPRR-FSAY LLLCLCLLVISISRGYGSOKLYIVYLGEEKHDDASLV TASHHDMLSAI LSGKQEALAS IAYSYKHGF   | 79  |
| <i>B. distachyon</i>  | 1   | MDLRTAFSC---A LLLAVTL LPP-PSANASSKLYIVYLGEEKHDDPTVVTASHHDVLT SVLGSKDEALKSIVYSYKHGF      | 74  |
| <i>Maize</i>          | 78  | SGFAALLTEDQAKQLAEFPEVISVEPSRSYTTMTTRS WDFLGLN--YQMPNE--LLHRSNYGEDIIIGVIDTG IWPESSRS     | 153 |
| <i>Sorghum</i>        | 81  | SGFAAMLTEDQAEQLADLPEVISVQPSRTFTAATTRS WDFLGLN--YQMPSE--LLRKSNGQEDIIIGVIDTG IWPESSRS     | 156 |
| <i>O. sativa</i>      | 79  | SGFAAMLTEDQADNLADLPEVISVTPNKQHELLTTRS WDFLGLN--YQPPNK--LLQRSKYGEDVIGMIDTG IWPESSRS      | 154 |
| <i>O. glaberrima</i>  | 79  | SGFAAMLTEDQAEENLADLPEVISVTPNKQHELLTTRS WDFLGLN--YQPPNK--LLQRSKYGEDVIGMIDTG IWPESSRS     | 154 |
| <i>O. brachyantha</i> | 79  | SGFAAMLTEDQAEENLADLPEVISVTPNKQHELLTTRS WDFLGLN--YQPPSK--LLQRSKYGDVIGMIDTG IWPESSRS      | 154 |
| <i>Barley</i>         | 80  | SGFAAMLTDDQAEQLADLPEVISVTPNQNHDLTTRS WDFLGMNLDHOPPNK--LLQRSKYGEDVIGMIDTG IWPESSRS       | 157 |
| <i>B. distachyon</i>  | 75  | SGFAAMLTESQAEIITAKFPEVLSVKPNTYHKAHTTQSWDF LGM-DYVYKPPQQSGLLQKAKYGEDVIGMIDTG IWPESSRS    | 153 |
| <i>Maize</i>          | 154 | FSDEGYGVPVPSRWKGVQCVVGGEGWGSNNCSRKIIGARFY SAGVAEEELKIIDYLSPRDANGHGHTHTASTAAGSVVEAVS FHG | 233 |
| <i>Sorghum</i>        | 157 | FSDEGYGVPVPSRWKGEQVGGQWNSHCNRKIIGARFY SAGLPEEILNTDYLSPRDVNGHGHTHTASTAGSVVEAAS FHG       | 236 |
| <i>O. sativa</i>      | 155 | FSDHGYGPIPSRWKGVQCLGQAWGPTNCSRKIIGARYYAAG IEKADFKNYMSARDMIGHGHTHTASTAAGAVVDGVS VHG      | 234 |
| <i>O. glaberrima</i>  | 155 | FSDHGYGPIPSRWKGVQCLGQAWGPTNCSRKIIGARYYAAG IEKADFKNYMSARDMIGHGHTHTASTAAGAVVDGVS VHG      | 234 |
| <i>O. brachyantha</i> | 155 | FSDHGYGPIPARWKGVQCLGQAWGSTNCSRKIIGARYYAAGV DKAADLKNYMSARDMIGHGHTHTASTAAGSVVEGVS LHG     | 234 |
| <i>Barley</i>         | 158 | FSDDGYGPIPSRWKGVQCLGQAWGSTNCSRKIIGARYYPA GLDKADQANNYMSARDINGHGHTHTASTAAGAVVEGVS LHG     | 237 |
| <i>B. distachyon</i>  | 154 | FDDIYGYPVPARWKGTTCQTGAQFNATSCNRKIIGARWY SGLPAELLLGEYMSPRDLGGHGHTHTASTAGNQVRNAS YNN      | 233 |
| <i>Maize</i>          | 234 | LGAGAARGGAPRARLAVYKAIWGSRGAGAGNTATLLAA I DDAIDHGVDVLSLSLAS-VENSFGALHAVQKGVAVVYAAT       | 312 |
| <i>Sorghum</i>        | 237 | LAAGAARGGAPRARLAVYKSLWVG---TYGTSAGV LAAIDDAIDHGVDVLSLSLAHPQENSFGALHAVQKGITV VYAAG       | 313 |
| <i>O. sativa</i>      | 235 | LATGVARGGAPRARLAVYKVIWNTGN-SLQLASAGV LAAIDDAIDHGVDVLSLSIHA-DEDSFGALHAVQKGITV VYAGG      | 312 |
| <i>O. glaberrima</i>  | 235 | LATGVARGGAPRARLAVYKIWNTGN-SLQLASAGV LAAIDDAIDHGVDVLSLSIHA-DEDSFGALHAVQKGITV VYAGG       | 312 |
| <i>O. brachyantha</i> | 235 | LARGVARGGAPRARLAVYKVVWDTGN-SLQLASAGV LAAIDDAIDHGVDVLSLSLVA-DEDSFGALHAVQKGITV VYAGG      | 312 |
| <i>Barley</i>         | 238 | LAAGVARGGAPRARLAVYKVAFEQPK-KVQLASAALLAAL DDAIDHGVDVLSLSVVY-NDNSFGSLHAVQKGITV VYAGG      | 315 |
| <i>B. distachyon</i>  | 234 | LGSVARGGAPRARLAIYKVLWGG---ARGAVADT LAAVDQAIDHGVDVLSLSLGAAGFEYVYGLT LHAVQRGISVVFAGG      | 310 |
| <i>Maize</i>          | 313 | NFGPASQVVRNTAPWVITVAASQIDRSFPTITVLGN KQQIVGQSMYYGKNSGTSSFRPLVHGGLCTADS LNGTDVVRGQV      | 392 |
| <i>Sorghum</i>        | 314 | NSGPTPQTVA NTAPWVITVAASKIDRSFPTITVLGN KQQIVGQSLYYHGNSSGSTFKPLAYGDLCTVDSLNGTDVVRGQV      | 393 |
| <i>O. sativa</i>      | 313 | NDGPRPQVIFNTAPWVITAAASKIDRSFPTITVLGN KQTLVGGSLYYKLNNEKSGGFQPLVNGGDCSKGALNGTTINGSI       | 392 |
| <i>O. glaberrima</i>  | 313 | NDGPRPQVIFNTAPWVITAAASKIDRSFPTITVLGN KQTLVGGSLYYKLNNEKSGGFQPLVNGGDCSKGALNGTTINGSI       | 392 |
| <i>O. brachyantha</i> | 313 | NSGPRPQVIFNTAPWVITAAASKIDRSFPTITVLGN KQTLVGGSLYYKLDQGYKNGFQPLVNGGDCSREALNGTTIKGSI       | 392 |
| <i>Barley</i>         | 316 | NSGPRPQVMSNTAPWVITVAASKIDRSFPTITVLGN QALVGGSLYYMLKNEKSGGFQPLVNGGDCSVEALNGTIN GKV        | 395 |
| <i>B. distachyon</i>  | 311 | NDGPVPTVFNALPWWTTVAASTIDRSFPTLMTLGN KEKLVGGSLYSVNS---SDFQELVVISALS DTTTN---VTGKI        | 383 |
| <i>Maize</i>          | 393 | VLCAY-----ITAPFP-----VTLKNV L DAGASGLIFAQYNIHIIYATIDCRG-IACVLVDLTTALQIEKYMVDASSPA       | 461 |
| <i>Sorghum</i>        | 394 | VICASSIV-SQLAPLS-----VASKNVNAGG SGLIYAQYT-KDNTDSTAECCG-IACVLVDMTSIYQIDKYMGDASSPV        | 465 |
| <i>O. sativa</i>      | 393 | VLCIEITYGPI LNFVN-----TVFENV FSGASGLIFGLYT-TDMLLRTEDCQG-IPCVLVDIDIGSQVATYIGSQSMPV       | 465 |
| <i>O. glaberrima</i>  | 393 | VLCIEITYGPI LNFVN-----TVFENV FSGASGLIFGLYT-TDMLLRTEDCQG-IPCVLVDIDIGSQVATYIGSQSMPV       | 465 |
| <i>O. brachyantha</i> | 393 | VLCIEITYGPI LNFVD-----GIFGRV LGGASGLIFGLYT-TDMLLSTEDCQG-IACVLVDIDIGSQVATYIGSQSMPV       | 465 |
| <i>Barley</i>         | 396 | VLCIKETFGPPADIP-----DAITNVKTGASGLIFAIYT-FDKLLSTEDCVG-MACVLVDIDIGYQVATYIGSQGSPV          | 468 |
| <i>B. distachyon</i>  | 384 | VLFYAPSDNDVKFMPRLTFSEVLNHTAASRAKGLIFAQYT-ENLDSLAVCDRI LACVLVDFEARRIVSYSTSTRNPM          | 462 |
| <i>Maize</i>          | 462 | AMIEPARTITGKETLAPTIA SFSSRGPSIDYPEVIKPDIAAPGASILA AVKDAYAFSGTSMATPHVSGIVALLKALHPS       | 541 |
| <i>Sorghum</i>        | 466 | AKIEPARSI TGNELFSPTIAEFSSRGPSI EYPEVIKPDIAAPGASILA EKDAYVFKSGTSMATPHVAGIALLKSLHPQ       | 544 |
| <i>O. sativa</i>      | 466 | AKIEPARSI TGKEVLAPKVAIFSSRGPS TRYPTVLKPDIAAPGVNILA AKEGDYAFNSGTSMAPHVAGIALLKALHPD       | 545 |
| <i>O. glaberrima</i>  | 466 | AKIEPARSI TGKEVLAPKVAIFSSRGPS TRYPTVLKPDIAAPGVNILA AKEGDYAFNSGTSMAPHVAGIALLKALHPD       | 545 |
| <i>O. brachyantha</i> | 466 | AKIEPAQSI TGKEVLAPKVAIFSSRGPS IKYPTVLKPDIAAPGVNILA AKEGDYVFNSTSMAPHVAGIALLKALHPP        | 545 |
| <i>Barley</i>         | 469 | AKIEPASTITGVVRVAPRVAFFSSRGPS VKHPTVLKPDIAAPGVNILA ATGDGYVFDSGASMTSPHVAGIALLKAVHPD       | 548 |
| <i>B. distachyon</i>  | 463 | IKVSPAITITVGERVLSRVAFFSSRGPS ATFFA I LKPDVAAPGVSI LAAKGN SYVFMSTSMACPHVSAVTALLKSVHPS    | 542 |
| <i>Maize</i>          | 542 | WSPAALKSAIMTTASVSDERGMPI LAQGLPRKIADPF DYGAGHINPNRAADHGLIYDIDPNDY NMFFGCSFRKPV LRCNA    | 621 |
| <i>Sorghum</i>        | 545 | WSPAALKSAIMTTASVTDEHGMPI LAEGLPRKIADPF DYGGGHNPNKAADPGLIYDINPSDY NKFFGCAINKTYI RCNE     | 624 |
| <i>O. sativa</i>      | 546 | WSHAALKSAIVTSASTKDEYGMPI LAELPRKVIADPF DYGGGHNPNGAADPGLIYNDIPMDY NKFFAACKIKKHEI-CNI     | 624 |
| <i>O. glaberrima</i>  | 546 | WSHAALKSAIVTSASTKDEYGMPI LAELPRKVIADPF DYGGGHNPNGAADPGLMYDIDPMDY NKFFAACKIKKHEI-CNI     | 624 |
| <i>O. brachyantha</i> | 546 | WSHAALKSAIVTSASTKDEYGMPI LAELPRKVIADPF DYGGGHNPNGAADPGLVYDIDPMDY NKFFTCKIKKYEI-CNI      | 624 |
| <i>Barley</i>         | 549 | WSHAALKSAIVTASTKDEHGMPLAEALPRKVIADPF DYGGGHNPNGAADPGLVYDIDPRDY SKFFACTIQKYEI-CNI        | 627 |
| <i>B. distachyon</i>  | 543 | WSPAMIKSAIVTASVIDHFGAPIEADGIPRKVIADPF DFYGGGHNPNDRAMD PGLVYDIDGREYKFLNCTIRQFDD-CGT      | 621 |
| <i>Maize</i>          | 622 | TTLPGYQLNRIFCILA PKLNHRDLRQPTVTSRTVTNVGEADAVYRAAIESPA GVKIDVEPSV L VFN-ATNKAA TFQVNL S  | 700 |
| <i>Sorghum</i>        | 625 | TSVPGYHLN-----LPSISIPNLRRPITVTSRTVTNVGEVD AVYHAAIQSPAGVKMDVEPSV L VFN-STNKVHTFQV KLS    | 697 |
| <i>O. sativa</i>      | 625 | TTLPAYHLN-----LPSISIPELRHPKVRRRAVTNVGEVD AVYQSAIQSPLGVKIDVEPT L VFN-ATKKVNTFKVSMR       | 697 |
| <i>O. glaberrima</i>  | 625 | TTLPAYHLN-----LPSISIPELRYPKVRRRAVTNVGEVD AVYQSAIQSPLGVKIDVEPT L VFN-ATKKVNTFKVSMR       | 697 |
| <i>O. brachyantha</i> | 625 | TTLPAYHLN-----LPSISIPELRHPKVRRRAVTNVGEVD AVYQSAIQSPLGVKIDVEPT L VFN-ATKKVNTFKV SMA      | 697 |
| <i>Barley</i>         | 628 | STSPAYQLN-----LPSISIPELRGPKVQRAVTNVGEVD AVYRADIQSPPGVKIKVDPPT L VFN-ATKKVHAFKVSMT       | 700 |
| <i>B. distachyon</i>  | 622 | YMGELYQLN-----LPSIAVPDLKESITVTRRTVTNVGPVEATYQAVVEAPTGV DVSVEPSVITETTRDTSRSVVFTV RFT     | 695 |
| <i>Maize</i>          | 701 | PLWRLQGDYTFGSLTWYNG-PNDSL-----724                                                       |     |
| <i>Sorghum</i>        | 698 | PMWKLQGDYTFGSLTWYKGG-KQTVRIPIAARTL LHDYFADVA--738                                       |     |

**Supplementary Figure 12. Amino acid sequence alignment of Hwi2 homologues in cereal. The conserved amino acid residues in the catalytic triad are boxed in red. H<sup>531</sup> is labelled with a star.**

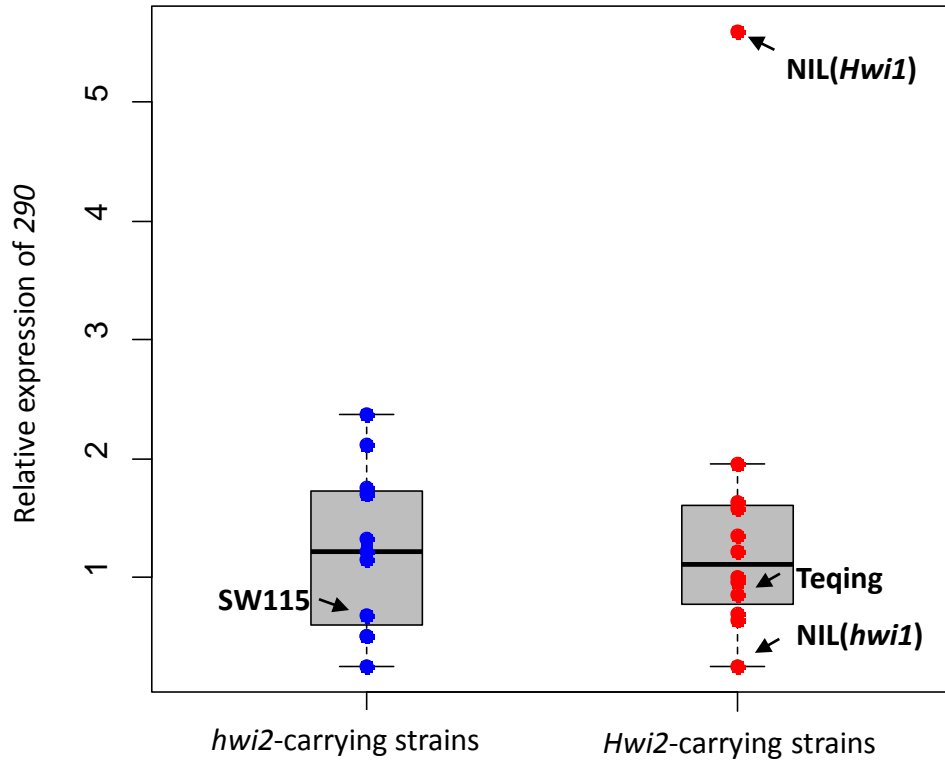

**Supplementary Figure 13. Box-and-whisker plot of the 290 expression in the basal nodes of *hwi2*- and *Hwi2*-carrying strains.** The dots indicate the mean of relative expression level of three biological replicates of different strains. *hwi2*-carrying strains were indicated in blue, from top to bottom were Shuangkezao, Jiangxisimiao, Zhenshan 97, Lemnont, Nipponbare, Jiao 1, Taiguoxiangmi, Zhaiyeqing, SW115, 9311 and Zhonghua 11, respectively. *Hwi2*-carrying strains were indicated in red, from top to bottom were NIL(*Hwi1*), Minghui 63, Chenglongshuijingmi, Huanghuazhan, Tesan'ai, Amol, Fengaizhan, IR29, Teqing, Zhong 4188, Miyang and NIL(*hwi1*), respectively. SW115, Teqing, NIL(*hwi1*) and NIL(*Hwi1*) were marked with arrows. The upper hinge, black central line and lower hinge of the boxes indicate 75<sup>th</sup> (Q3), 50<sup>th</sup> and 25<sup>th</sup> (Q1) percentiles, respectively. The “1.5 rule”, which defined the values less than  $Q1 - 1.5 * (Q3 - Q1)$  or more than  $Q3 + 1.5 * (Q3 - Q1)$  as the outliers, was adopted for outliers filtration. The upper and lower whiskers indicate the maximum and minimum value after outliers filtration.

**Supplementary Table 1.** Gene Ontology (GO) analysis of cluster 0 and cluster 3

| GO term    | Ontology | Description                                          | Number in BG/Ref | Cluster0             |                 |          | Cluster3             |                 |          |
|------------|----------|------------------------------------------------------|------------------|----------------------|-----------------|----------|----------------------|-----------------|----------|
|            |          |                                                      |                  | Number in input list | <i>p</i> -value | FDR      | Number in input list | <i>p</i> -value | FDR      |
| GO:0051704 | P        | multi-organism process                               | 229              | 9                    | 0.00037         | 0.0078   |                      |                 |          |
| GO:0009607 | P        | response to biotic stimulus                          | 174              | 10                   | 7.40E-06        | 0.00031  |                      |                 |          |
| GO:0051707 | P        | response to other organism                           | 159              | 8                    | 0.00015         | 0.0033   |                      |                 |          |
| GO:0019538 | P        | protein metabolic process                            | 2770             | 43                   | 0.0017          | 0.034    |                      |                 |          |
| GO:0044267 | P        | cellular protein metabolic process                   | 2166             | 40                   | 0.0001          | 0.0024   |                      |                 |          |
| GO:0006519 | P        | cellular amino acid and derivative metabolic process | 1105             | 21                   | 0.0025          | 0.044    |                      |                 |          |
| GO:0009069 | P        | serine family amino acid metabolic process           | 538              | 13                   | 0.0022          | 0.04     |                      |                 |          |
| GO:0034641 | P        | cellular nitrogen compound metabolic process         | 459              | 16                   | 1.20E-05        | 0.00044  | 19                   | 5.40E-06        | 0.00042  |
| GO:0043412 | P        | macromolecule modification                           | 1406             | 39                   | 1.00E-08        | 5.00E-07 | 35                   | 9.30E-05        | 0.004    |
| GO:0006793 | P        | phosphorus metabolic process                         | 1206             | 36                   | 5.80E-09        | 3.20E-07 | 31                   | 0.00013         | 0.004    |
| GO:0006464 | P        | protein modification process                         | 1359             | 39                   | 4.30E-09        | 3.20E-07 | 34                   | 0.0001          | 0.004    |
| GO:0006796 | P        | phosphate metabolic process                          | 1206             | 36                   | 5.80E-09        | 3.20E-07 | 31                   | 0.00013         | 0.004    |
| GO:0043687 | P        | post-translational protein modification              | 1236             | 38                   | 1.10E-09        | 1.20E-07 | 34                   | 1.70E-05        | 0.0011   |
| GO:0016310 | P        | phosphorylation                                      | 1080             | 36                   | 3.50E-10        | 5.70E-08 | 29                   | 9.80E-05        | 0.004    |
| GO:0006468 | P        | protein amino acid phosphorylation                   | 887              | 33                   | 1.10E-10        | 3.80E-08 | 26                   | 5.40E-05        | 0.003    |
| GO:0016265 | P        | death                                                | 429              | 15                   | 2.10E-05        | 0.00058  | 22                   | 2.90E-08        | 2.80E-06 |
| GO:0008219 | P        | cell death                                           | 429              | 15                   | 2.10E-05        | 0.00058  | 22                   | 2.90E-08        | 2.80E-06 |
| GO:0012501 | P        | programmed cell death                                | 419              | 15                   | 1.60E-05        | 0.00053  | 22                   | 1.90E-08        | 2.80E-06 |
| GO:0006915 | P        | apoptosis                                            | 391              | 14                   | 3.00E-05        | 0.00076  | 21                   | 2.70E-08        | 2.80E-06 |

**Supplementary Table 2.** *Chi* test of segregation ratios of F<sub>2</sub> populations derived from crosses between SW115 and different germplasms

| No.    | Cross                   | Ecotype         | Observed |        | Expected |        | <i>P</i> (9:7) * |
|--------|-------------------------|-----------------|----------|--------|----------|--------|------------------|
|        |                         |                 | Weakness | Normal | Weakness | Normal |                  |
| F2-60  | Fengaizha/SW115         | <i>indica</i>   | 38       | 35     | 41       | 32     | 0.4700           |
| F2-61  | Huanghuazhan/SW115      | <i>indica</i>   | 40       | 46     | 48       | 38     | 0.0687           |
| F2-64  | IR29/SW115              | <i>indica</i>   | 82       | 68     | 84       | 66     | 0.6959           |
| F2-65  | SW115/Chenglongshuijing | <i>indica</i>   | 116      | 78     | 109      | 85     | 0.3197           |
| F2-63  | Teqing/SW115            | <i>indica</i>   | 63       | 57     | 68       | 53     | 0.4076           |
| F2-67  | SW115/Teqing            | <i>indica</i>   | 58       | 62     | 68       | 53     | 0.0804           |
| F2-115 | Amol/SW115              | <i>indica</i>   | 67       | 47     | 64       | 50     | 0.5873           |
| F2-116 | Zhong4188/SW115         | <i>indica</i>   | 70       | 50     | 68       | 53     | 0.6455           |
| F2-118 | Miyang/SW115            | <i>indica</i>   | 38       | 22     | 34       | 26     | 0.2687           |
| F2-119 | Minghui/SW115           | <i>indica</i>   | 47       | 35     | 46       | 36     | 0.8456           |
| F2-66  | SW115/Shuangkezao       | <i>indica</i>   | 0        |        |          |        |                  |
| F2-62  | Niponbare/SW115         | <i>japonica</i> | 0        |        |          |        |                  |
| F2-68  | SW115/Jia1hao           | <i>japonica</i> | 0        |        |          |        |                  |
| F2-69  | Zhonghua11/SW115        | <i>japonica</i> | 0        |        |          |        |                  |
| F2-112 | 93-11/SW115             | <i>indica</i>   | 0        |        |          |        |                  |
| F2-113 | Zhenshan97/SW115        | <i>indica</i>   | 0        |        |          |        |                  |
| F2-114 | Zhaiyeqing/SW115        | <i>indica</i>   | 0        |        |          |        |                  |
| F2-117 | Jiangxisimiao/SW115     | <i>indica</i>   | 0        |        |          |        |                  |

\*, *p*- values of the *chi* -test if observe:expected fits 9:7

**Supplementary Table 3.** Distribution of *Hwil* alleles in wild rice.

| No.   | Species             | Original producing area | Latitude | Longitude | Ecotype       | <i>Hwil</i> locus |
|-------|---------------------|-------------------------|----------|-----------|---------------|-------------------|
| W0106 | <i>O. rufipogon</i> | India                   | 20.46    | 85.88     | <i>Or-I</i>   | 9311-like         |
| W0121 | <i>O. rufipogon</i> | India                   | 20.46    | 85.88     | <i>Or-I</i>   | 9311-like         |
| W0152 | <i>O. rufipogon</i> | India                   | 22.90    | 88.25     | <i>Or-I</i>   | 9311-like         |
| W0163 | <i>O. rufipogon</i> | Thailand                | 18.81    | 98.66     | <i>Or-II</i>  | 9311-like         |
| W0164 | <i>O. rufipogon</i> | Thailand                | 18.81    | 98.66     | <i>Or-II</i>  | 9311-like         |
| W0173 | <i>O. rufipogon</i> | Thailand                | 15.87    | 100.99    | <i>Or-I</i>   | 9311-like         |
| W0176 | <i>O. rufipogon</i> | Thailand                | 18.08    | 103.27    | <i>Or-I</i>   | 9311-like         |
| W0234 | <i>O. rufipogon</i> | Thailand                | 18.08    | 103.27    | <i>Or-II</i>  | 9311-like         |
| W0590 | <i>O. rufipogon</i> | Malaya                  | 5.70     | 102.53    | <i>Or-I</i>   | 9311-like         |
| W0594 | <i>O. rufipogon</i> | Malaya                  | 3.14     | 101.69    | <i>Or-II</i>  | 9311-like         |
| W0596 | <i>O. rufipogon</i> | Malaya                  | 3.14     | 101.69    | <i>Or-II</i>  | 9311-like         |
| W0606 | <i>O. rufipogon</i> | Malaya                  | 6.00     | 102.25    | <i>Or-II</i>  | 9311-like         |
| W0626 | <i>O. rufipogon</i> | Burma                   | 19.77    | 96.11     | <i>Or-I</i>   | 9311-like         |
| W0627 | <i>O. rufipogon</i> | Burma                   | 19.77    | 96.11     | <i>Or-I</i>   | 9311-like         |
| W0635 | <i>O. rufipogon</i> | Burma                   | 19.77    | 96.11     | <i>Or-II</i>  | 9311-like         |
| W0638 | <i>O. rufipogon</i> | Burma                   | 14.08    | 98.20     | <i>Or-I</i>   | 9311-like         |
| W0639 | <i>O. rufipogon</i> | Burma                   | 19.77    | 96.11     | <i>Or-I</i>   | 9311-like         |
| W1080 | <i>O. rufipogon</i> | India                   | 27.00    | 88.40     | <i>Or-I</i>   | 9311-like         |
| W1086 | <i>O. rufipogon</i> | India                   | 27.00    | 88.40     | <i>Or-I</i>   | 9311-like         |
| W1090 | <i>O. rufipogon</i> | India                   | 26.15    | 91.74     | <i>Or-I</i>   | 9311-like         |
| W1092 | <i>O. rufipogon</i> | India                   | 26.15    | 91.74     | <i>Or-I</i>   | 9311-like         |
| W1117 | <i>O. rufipogon</i> | India                   | 26.82    | 94.17     | <i>Or-I</i>   | 9311-like         |
| W1556 | <i>O. rufipogon</i> | Thailand                | 14.54    | 99.99     | <i>Or-II</i>  | 9311-like         |
| W1619 | <i>O. rufipogon</i> | Thailand                | 14.50    | 100.89    | <i>Or-I</i>   | 9311-like         |
| W1675 | <i>O. rufipogon</i> | India                   | 20.29    | 86.01     | <i>Or-I</i>   | 9311-like         |
| W1677 | <i>O. rufipogon</i> | India                   | 20.29    | 86.01     | <i>Or-I</i>   | 9311-like         |
| W1685 | <i>O. rufipogon</i> | India                   | 20.14    | 85.47     | <i>Or-I</i>   | 9311-like         |
| W1696 | <i>O. rufipogon</i> | Thailand                | 19.45    | 99.44     | <i>Or-I</i>   | 9311-like         |
| W1698 | <i>O. rufipogon</i> | Thailand                | 14.34    | 100.59    | <i>Or-I</i>   | 9311-like         |
| W1718 | <i>O. rufipogon</i> | China                   | NA       | NA        | <i>Or-II</i>  | 9311-like         |
| W1719 | <i>O. rufipogon</i> | China                   | NA       | NA        | <i>Or-I</i>   | 9311-like         |
| W1721 | <i>O. rufipogon</i> | China                   | NA       | NA        | <i>Or-I</i>   | 9311-like         |
| W1723 | <i>O. rufipogon</i> | China                   | NA       | NA        | <i>Or-I</i>   | 9311-like         |
| W1724 | <i>O. rufipogon</i> | China                   | NA       | NA        | <i>Or-III</i> | 9311-like         |
| W1736 | <i>O. rufipogon</i> | India                   | 26.92    | 75.82     | <i>Or-II</i>  | 9311-like         |
| W1737 | <i>O. rufipogon</i> | India                   | 26.92    | 75.82     | <i>Or-I</i>   | 9311-like         |
| W1739 | <i>O. rufipogon</i> | India                   | 26.92    | 75.82     | <i>Or-III</i> | 9311-like         |
| W1794 | <i>O. rufipogon</i> | Thailand                | 15.00    | 100.00    | <i>Or-I</i>   | 9311-like         |
| W1820 | <i>O. rufipogon</i> | Bangladesh              | 23.71    | 90.41     | <i>Or-I</i>   | 9311-like         |
| W1839 | <i>O. rufipogon</i> | China                   | NA       | NA        | <i>Or-I</i>   | 9311-like         |
| W1844 | <i>O. rufipogon</i> | China                   | NA       | NA        | <i>Or-III</i> | 9311-like         |
| W1850 | <i>O. rufipogon</i> | Thailand                | 19.56    | 99.70     | <i>Or-II</i>  | 9311-like         |
| W1852 | <i>O. rufipogon</i> | Thailand                | 20.28    | 100.09    | <i>Or-I</i>   | 9311-like         |
| W1880 | <i>O. rufipogon</i> | Thailand                | 17.03    | 102.91    | <i>Or-II</i>  | 9311-like         |
| W1881 | <i>O. rufipogon</i> | Thailand                | 17.03    | 102.91    | <i>Or-I</i>   | 9311-like         |
| W1884 | <i>O. rufipogon</i> | Thailand                | 17.03    | 102.91    | <i>Or-II</i>  | 9311-like         |
| W1914 | <i>O. rufipogon</i> | Thailand                | 14.95    | 103.75    | <i>Or-I</i>   | 9311-like         |
| W1921 | <i>O. rufipogon</i> | Thailand                | 14.44    | 100.90    | <i>Or-I</i>   | 9311-like         |
| W1928 | <i>O. rufipogon</i> | Thailand                | 15.29    | 100.18    | <i>Or-I</i>   | 9311-like         |
| W1935 | <i>O. rufipogon</i> | Thailand                | 6.89     | 100.53    | <i>Or-I</i>   | 9311-like         |
| W1958 | <i>O. rufipogon</i> | China                   | NA       | NA        | <i>Or-III</i> | 9311-like         |



|       |                     |            |       |        |               |           |
|-------|---------------------|------------|-------|--------|---------------|-----------|
| W1975 | <i>O. rufipogon</i> | Indonesia  | -2.99 | 104.76 | <i>Or-II</i>  | 9311-like |
| W2053 | <i>O. rufipogon</i> | Bangladesh | 23.71 | 90.41  | <i>Or-I</i>   | 9311-like |
| W2063 | <i>O. rufipogon</i> | Bangladesh | 22.82 | 89.55  | <i>Or-I</i>   | 9311-like |
| W2308 | <i>O. rufipogon</i> | Laos       | 17.57 | 102.38 | <i>Or-II</i>  | 9311-like |
| W2310 | <i>O. rufipogon</i> | Laos       | 17.51 | 102.36 | <i>Or-II</i>  | 9311-like |
| W2316 | <i>O. rufipogon</i> | Vietnam    | 10.39 | 107.02 | <i>Or-I</i>   | 9311-like |
| W2318 | <i>O. rufipogon</i> | Vietnam    | 10.24 | 106.06 | <i>Or-II</i>  | 9311-like |
| W2319 | <i>O. rufipogon</i> | Vietnam    | 10.33 | 106.25 | <i>Or-I</i>   | 9311-like |
| W2320 | <i>O. rufipogon</i> | Vietnam    | 10.42 | 105.36 | <i>Or-II</i>  | 9311-like |
| W2331 | <i>O. rufipogon</i> | Vietnam    | 21.03 | 105.85 | <i>Or-I</i>   | 9311-like |
| W3003 | <i>O. rufipogon</i> | China      | 22.19 | 112.31 | <i>Or-II</i>  | 9311-like |
| W3009 | <i>O. rufipogon</i> | China      | 22.89 | 112.85 | <i>Or-III</i> | 9311-like |
| W3021 | <i>O. rufipogon</i> | China      | 23.87 | 113.53 | <i>Or-III</i> | 9311-like |
| W3024 | <i>O. rufipogon</i> | China      | 23.87 | 113.53 | <i>Or-III</i> | 9311-like |
| W3026 | <i>O. rufipogon</i> | China      | 23.64 | 115.17 | <i>Or-III</i> | 9311-like |
| W3060 | <i>O. rufipogon</i> | China      | 18.75 | 109.17 | <i>Or-III</i> | 9311-like |
| W3068 | <i>O. rufipogon</i> | China      | 18.65 | 109.80 | <i>Or-II</i>  | 9311-like |
| W3072 | <i>O. rufipogon</i> | China      | 19.62 | 110.70 | <i>Or-II</i>  | 9311-like |
| W3074 | <i>O. rufipogon</i> | China      | 19.62 | 110.70 | <i>Or-III</i> | 9311-like |
| W3083 | <i>O. rufipogon</i> | China      | 22.10 | 100.79 | <i>Or-III</i> | 9311-like |
| W3089 | <i>O. rufipogon</i> | China      | 22.10 | 100.79 | <i>Or-II</i>  | 9311-like |
| W3091 | <i>O. rufipogon</i> | China      | 26.80 | 113.55 | <i>Or-II</i>  | 9311-like |
| W3093 | <i>O. rufipogon</i> | China      | 25.28 | 111.34 | <i>Or-III</i> | 9311-like |
| W0103 | <i>O. rufipogon</i> | India      | 20.48 | 85.85  | <i>Or-I</i>   | NB-like   |
| W1795 | <i>O. rufipogon</i> | Thailand   | 15.00 | 100.00 | <i>Or-I</i>   | NB-like   |
| W1788 | <i>O. rufipogon</i> | Thailand   | 15.00 | 100.00 | <i>Or-I</i>   | NB-like   |
| W0107 | <i>O. rufipogon</i> | India      | 20.95 | 85.10  | <i>Or-I</i>   | NB-like   |
| W0123 | <i>O. rufipogon</i> | India      | 20.46 | 85.93  | <i>Or-I</i>   | NB-like   |
| W0124 | <i>O. rufipogon</i> | India      | 21.00 | 85.10  | <i>Or-I</i>   | NB-like   |
| W0125 | <i>O. rufipogon</i> | India      | 21.00 | 85.10  | <i>Or-III</i> | NB-like   |
| W0126 | <i>O. rufipogon</i> | India      | 21.00 | 85.10  | <i>Or-III</i> | NB-like   |
| W0130 | <i>O. rufipogon</i> | India      | 21.00 | 85.10  | <i>Or-I</i>   | NB-like   |
| W0133 | <i>O. rufipogon</i> | India      | 17.05 | 82.18  | <i>Or-III</i> | NB-like   |
| W0134 | <i>O. rufipogon</i> | India      | 16.93 | 81.88  | <i>Or-III</i> | NB-like   |
| W0136 | <i>O. rufipogon</i> | India      | 16.91 | 81.82  | <i>Or-III</i> | NB-like   |
| W0137 | <i>O. rufipogon</i> | India      | 16.91 | 81.82  | <i>Or-III</i> | NB-like   |
| W0138 | <i>O. rufipogon</i> | India      | 10.51 | 76.65  | <i>Or-III</i> | NB-like   |
| W0141 | <i>O. rufipogon</i> | India      | 10.37 | 76.37  | <i>Or-III</i> | NB-like   |
| W0144 | <i>O. rufipogon</i> | Sri Lanka  | 7.07  | 80.30  | <i>Or-I</i>   | NB-like   |
| W0147 | <i>O. rufipogon</i> | India      | 20.48 | 85.85  | <i>Or-I</i>   | NB-like   |
| W0148 | <i>O. rufipogon</i> | India      | 20.48 | 85.85  | <i>Or-I</i>   | NB-like   |
| W0153 | <i>O. rufipogon</i> | India      | 22.40 | 88.66  | <i>Or-III</i> | NB-like   |
| W0172 | <i>O. rufipogon</i> | Thailand   | 15.87 | 100.99 | <i>Or-III</i> | NB-like   |
| W0549 | <i>O. rufipogon</i> | India      | 13.00 | 77.60  | <i>Or-III</i> | NB-like   |
| W0573 | <i>O. rufipogon</i> | Malaya     | 3.10  | 101.50 | <i>Or-III</i> | NB-like   |
| W0574 | <i>O. rufipogon</i> | Malaya     | 3.10  | 101.50 | <i>Or-I</i>   | NB-like   |
| W0589 | <i>O. rufipogon</i> | Malaya     | 5.70  | 102.53 | <i>Or-I</i>   | NB-like   |
| W0593 | <i>O. rufipogon</i> | Malaya     | 3.14  | 101.69 | <i>Or-III</i> | NB-like   |
| W0605 | <i>O. rufipogon</i> | Malaya     | 5.80  | 102.39 | <i>Or-I</i>   | NB-like   |
| W0630 | <i>O. rufipogon</i> | Burma      | 20.46 | 94.56  | <i>Or-I</i>   | NB-like   |
| W0631 | <i>O. rufipogon</i> | Burma      | 18.82 | 95.22  | <i>Or-I</i>   | NB-like   |
| W0632 | <i>O. rufipogon</i> | Burma      | 18.82 | 95.22  | <i>Or-I</i>   | NB-like   |
| W0633 | <i>O. rufipogon</i> | Burma      | 18.82 | 95.22  | <i>Or-I</i>   | NB-like   |

|       |                     |                  |       |        |               |         |
|-------|---------------------|------------------|-------|--------|---------------|---------|
| W1082 | <i>O. rufipogon</i> | India            | 27.00 | 88.40  | <i>Or-I</i>   | NB-like |
| W1083 | <i>O. rufipogon</i> | India            | 27.00 | 88.40  | <i>Or-I</i>   | NB-like |
| W1084 | <i>O. rufipogon</i> | India            | 27.00 | 88.40  | <i>Or-I</i>   | NB-like |
| W1105 | <i>O. rufipogon</i> | India            | 26.82 | 94.17  | <i>Or-I</i>   | NB-like |
| W1107 | <i>O. rufipogon</i> | India            | 26.82 | 94.17  | <i>Or-I</i>   | NB-like |
| W1111 | <i>O. rufipogon</i> | India            | 26.82 | 94.17  | <i>Or-I</i>   | NB-like |
| W1112 | <i>O. rufipogon</i> | India            | 26.82 | 94.17  | <i>Or-I</i>   | NB-like |
| W1119 | <i>O. rufipogon</i> | India            | 26.82 | 94.17  | <i>Or-III</i> | NB-like |
| W1121 | <i>O. rufipogon</i> | India            | 26.82 | 94.17  | <i>Or-I</i>   | NB-like |
| W1142 | <i>O. rufipogon</i> | India            | 20.46 | 85.93  | <i>Or-I</i>   | NB-like |
| W1143 | <i>O. rufipogon</i> | India            | 20.46 | 85.93  | <i>Or-I</i>   | NB-like |
| W1161 | <i>O. rufipogon</i> | Sri Lanka        | 6.55  | 80.10  | <i>Or-III</i> | NB-like |
| W1238 | <i>O. rufipogon</i> | Neth. New Guinea | -4.63 | 138.93 | <i>Or-III</i> | NB-like |
| W1294 | <i>O. rufipogon</i> | Philippines      | 7.86  | 124.86 | <i>Or-III</i> | NB-like |
| W1295 | <i>O. rufipogon</i> | Cambodia         | 12.82 | 102.67 | <i>Or-I</i>   | NB-like |
| W1532 | <i>O. rufipogon</i> | India            | 20.46 | 85.88  | <i>Or-I</i>   | NB-like |
| W1533 | <i>O. rufipogon</i> | India            | 20.46 | 85.88  | <i>Or-I</i>   | NB-like |
| W1542 | <i>O. rufipogon</i> | Malaya           | 3.14  | 101.69 | <i>Or-III</i> | NB-like |
| W1676 | <i>O. rufipogon</i> | India            | 20.29 | 86.01  | <i>Or-I</i>   | NB-like |
| W1679 | <i>O. rufipogon</i> | India            | 20.29 | 86.01  | <i>Or-I</i>   | NB-like |
| W1732 | <i>O. rufipogon</i> | India            | 19.50 | 84.81  | <i>Or-III</i> | NB-like |
| W1735 | <i>O. rufipogon</i> | India            | 26.92 | 75.82  | <i>Or-I</i>   | NB-like |
| W1738 | <i>O. rufipogon</i> | India            | 26.92 | 75.82  | <i>Or-I</i>   | NB-like |
| W1740 | <i>O. rufipogon</i> | India            | 26.92 | 75.82  | <i>Or-I</i>   | NB-like |
| W1741 | <i>O. rufipogon</i> | India            | 26.92 | 75.82  | <i>Or-I</i>   | NB-like |
| W1743 | <i>O. rufipogon</i> | India            | 26.92 | 75.82  | <i>Or-I</i>   | NB-like |
| W1747 | <i>O. rufipogon</i> | India            | 26.92 | 75.82  | <i>Or-I</i>   | NB-like |
| W1750 | <i>O. rufipogon</i> | India            | 18.40 | 81.68  | <i>Or-I</i>   | NB-like |
| W1751 | <i>O. rufipogon</i> | India            | 18.40 | 81.68  | <i>Or-I</i>   | NB-like |
| W1753 | <i>O. rufipogon</i> | India            | 18.40 | 81.68  | <i>Or-I</i>   | NB-like |
| W1756 | <i>O. rufipogon</i> | India            | 20.27 | 81.50  | <i>Or-I</i>   | NB-like |
| W1757 | <i>O. rufipogon</i> | India            | 20.27 | 81.50  | <i>Or-I</i>   | NB-like |
| W1762 | <i>O. rufipogon</i> | India            | 21.25 | 81.63  | <i>Or-I</i>   | NB-like |
| W1770 | <i>O. rufipogon</i> | India            | 21.18 | 81.36  | <i>Or-I</i>   | NB-like |
| W1777 | <i>O. rufipogon</i> | India            | 19.95 | 79.30  | <i>Or-III</i> | NB-like |
| W1782 | <i>O. rufipogon</i> | India            | 12.31 | 76.64  | <i>Or-III</i> | NB-like |
| W1802 | <i>O. rufipogon</i> | Bangladesh       | 23.71 | 90.41  | <i>Or-I</i>   | NB-like |
| W1803 | <i>O. rufipogon</i> | Sri Lanka        | 6.93  | 79.95  | <i>Or-III</i> | NB-like |
| W1819 | <i>O. rufipogon</i> | Bangladesh       | 23.71 | 90.41  | <i>Or-I</i>   | NB-like |
| W1821 | <i>O. rufipogon</i> | Bangladesh       | 23.71 | 90.41  | <i>Or-I</i>   | NB-like |
| W1822 | <i>O. rufipogon</i> | Bangladesh       | 23.71 | 90.41  | <i>Or-I</i>   | NB-like |
| W1823 | <i>O. rufipogon</i> | Bangladesh       | 23.71 | 90.41  | <i>Or-I</i>   | NB-like |
| W1832 | <i>O. rufipogon</i> | Thailand         | 13.92 | 100.59 | <i>Or-I</i>   | NB-like |
| W1853 | <i>O. rufipogon</i> | Thailand         | 19.75 | 99.73  | <i>Or-I</i>   | NB-like |
| W1857 | <i>O. rufipogon</i> | Thailand         | 18.35 | 99.53  | <i>Or-II</i>  | NB-like |
| W1870 | <i>O. rufipogon</i> | Thailand         | 15.23 | 102.50 | <i>Or-II</i>  | NB-like |
| W1890 | <i>O. rufipogon</i> | Thailand         | 17.85 | 102.75 | <i>Or-II</i>  | NB-like |
| W1939 | <i>O. rufipogon</i> | Thailand         | 8.54  | 99.73  | <i>Or-II</i>  | NB-like |
| W1940 | <i>O. rufipogon</i> | Thailand         | 14.92 | 103.51 | <i>Or-II</i>  | NB-like |
| W1943 | <i>O. rufipogon</i> | China            | NA    | NA     | <i>Or-III</i> | NB-like |
| W1945 | <i>O. rufipogon</i> | China            | NA    | NA     | <i>Or-III</i> | NB-like |
| W1952 | <i>O. rufipogon</i> | China            | NA    | NA     | <i>Or-III</i> | NB-like |
| W1957 | <i>O. rufipogon</i> | China            | NA    | NA     | <i>Or-III</i> | NB-like |

|       |                     |            |       |        |               |         |
|-------|---------------------|------------|-------|--------|---------------|---------|
| W1963 | <i>O. rufipogon</i> | China      | NA    | NA     | <i>Or-III</i> | NB-like |
| W1976 | <i>O. rufipogon</i> | Indonesia  | -6.40 | 106.82 | <i>Or-II</i>  | NB-like |
| W1978 | <i>O. rufipogon</i> | Indonesia  | -6.40 | 106.82 | <i>Or-II</i>  | NB-like |
| W1983 | <i>O. rufipogon</i> | India      | 18.50 | 73.15  | <i>Or-I</i>   | NB-like |
| W1989 | <i>O. rufipogon</i> | India      | 20.30 | 73.00  | <i>Or-III</i> | NB-like |
| W1990 | <i>O. rufipogon</i> | India      | 23.10 | 72.45  | <i>Or-III</i> | NB-like |
| W1991 | <i>O. rufipogon</i> | India      | 22.30 | 71.05  | <i>Or-III</i> | NB-like |
| W1993 | <i>O. rufipogon</i> | India      | 24.60 | 72.80  | <i>Or-III</i> | NB-like |
| W1995 | <i>O. rufipogon</i> | India      | 22.42 | 73.00  | <i>Or-III</i> | NB-like |
| W1998 | <i>O. rufipogon</i> | India      | 22.20 | 73.20  | <i>Or-III</i> | NB-like |
| W2003 | <i>O. rufipogon</i> | India      | 15.30 | 73.50  | <i>Or-III</i> | NB-like |
| W2007 | <i>O. rufipogon</i> | India      | 16.00 | 74.30  | <i>Or-III</i> | NB-like |
| W2008 | <i>O. rufipogon</i> | India      | 16.20 | 74.20  | <i>Or-III</i> | NB-like |
| W2010 | <i>O. rufipogon</i> | India      | 19.00 | 73.06  | <i>Or-III</i> | NB-like |
| W2014 | <i>O. rufipogon</i> | India      | 20.18 | 72.55  | <i>Or-III</i> | NB-like |
| W2050 | <i>O. rufipogon</i> | Bangladesh | 23.71 | 90.41  | <i>Or-II</i>  | NB-like |
| W2051 | <i>O. rufipogon</i> | Bangladesh | 23.71 | 90.41  | <i>Or-II</i>  | NB-like |
| W2052 | <i>O. rufipogon</i> | Bangladesh | 23.71 | 90.41  | <i>Or-II</i>  | NB-like |
| W2064 | <i>O. rufipogon</i> | Bangladesh | 22.82 | 89.55  | <i>Or-I</i>   | NB-like |
| W2193 | <i>O. rufipogon</i> | India      | 24.83 | 93.93  | <i>Or-I</i>   | NB-like |
| W2198 | <i>O. rufipogon</i> | China      | NA    | NA     | <i>Or-III</i> | NB-like |
| W2267 | <i>O. rufipogon</i> | Laos       | 18.14 | 102.42 | <i>Or-III</i> | NB-like |
| W2272 | <i>O. rufipogon</i> | Thailand   | 16.21 | 102.48 | <i>Or-II</i>  | NB-like |
| W2322 | <i>O. rufipogon</i> | Vietnam    | 10.45 | 105.32 | <i>Or-II</i>  | NB-like |
| W3000 | <i>O. rufipogon</i> | China      | 21.38 | 110.25 | <i>Or-III</i> | NB-like |
| W3004 | <i>O. rufipogon</i> | China      | 22.25 | 112.79 | <i>Or-III</i> | NB-like |
| W3005 | <i>O. rufipogon</i> | China      | 22.25 | 112.79 | <i>Or-III</i> | NB-like |
| W3006 | <i>O. rufipogon</i> | China      | 22.38 | 112.69 | <i>Or-III</i> | NB-like |
| W3008 | <i>O. rufipogon</i> | China      | 22.53 | 113.04 | <i>Or-III</i> | NB-like |
| W3010 | <i>O. rufipogon</i> | China      | 23.17 | 112.89 | <i>Or-III</i> | NB-like |
| W3011 | <i>O. rufipogon</i> | China      | 23.17 | 112.89 | <i>Or-III</i> | NB-like |
| W3013 | <i>O. rufipogon</i> | China      | 23.12 | 113.26 | <i>Or-III</i> | NB-like |
| W3014 | <i>O. rufipogon</i> | China      | 23.29 | 113.83 | <i>Or-III</i> | NB-like |
| W3015 | <i>O. rufipogon</i> | China      | 23.29 | 113.83 | <i>Or-III</i> | NB-like |
| W3016 | <i>O. rufipogon</i> | China      | 23.05 | 113.75 | <i>Or-III</i> | NB-like |
| W3018 | <i>O. rufipogon</i> | China      | 22.80 | 114.46 | <i>Or-III</i> | NB-like |
| W3022 | <i>O. rufipogon</i> | China      | 23.72 | 113.02 | <i>Or-III</i> | NB-like |
| W3023 | <i>O. rufipogon</i> | China      | 23.72 | 113.02 | <i>Or-III</i> | NB-like |
| W3027 | <i>O. rufipogon</i> | China      | 21.95 | 108.61 | <i>Or-III</i> | NB-like |
| W3028 | <i>O. rufipogon</i> | China      | 21.95 | 108.61 | <i>Or-III</i> | NB-like |
| W3029 | <i>O. rufipogon</i> | China      | 21.80 | 109.19 | <i>Or-III</i> | NB-like |
| W3030 | <i>O. rufipogon</i> | China      | 21.80 | 109.19 | <i>Or-III</i> | NB-like |
| W3031 | <i>O. rufipogon</i> | China      | 21.77 | 108.36 | <i>Or-III</i> | NB-like |
| W3032 | <i>O. rufipogon</i> | China      | 21.77 | 108.36 | <i>Or-III</i> | NB-like |
| W3034 | <i>O. rufipogon</i> | China      | 22.28 | 109.97 | <i>Or-III</i> | NB-like |
| W3036 | <i>O. rufipogon</i> | China      | 22.63 | 110.14 | <i>Or-III</i> | NB-like |
| W3038 | <i>O. rufipogon</i> | China      | 23.07 | 109.36 | <i>Or-III</i> | NB-like |
| W3039 | <i>O. rufipogon</i> | China      | 23.39 | 110.07 | <i>Or-III</i> | NB-like |
| W3041 | <i>O. rufipogon</i> | China      | 22.75 | 108.49 | <i>Or-III</i> | NB-like |
| W3043 | <i>O. rufipogon</i> | China      | 23.17 | 108.28 | <i>Or-III</i> | NB-like |
| W3044 | <i>O. rufipogon</i> | China      | 23.17 | 108.28 | <i>Or-III</i> | NB-like |
| W3048 | <i>O. rufipogon</i> | China      | 23.90 | 106.61 | <i>Or-III</i> | NB-like |
| W3050 | <i>O. rufipogon</i> | China      | 23.90 | 106.61 | <i>Or-III</i> | NB-like |

|       |                     |                       |       |        |               |         |
|-------|---------------------|-----------------------|-------|--------|---------------|---------|
| W3053 | <i>O. rufipogon</i> | China                 | 19.10 | 110.35 | <i>Or-III</i> | NB-like |
| W3054 | <i>O. rufipogon</i> | China                 | 19.10 | 110.35 | <i>Or-III</i> | NB-like |
| W3055 | <i>O. rufipogon</i> | China                 | 19.10 | 110.35 | <i>Or-III</i> | NB-like |
| W3056 | <i>O. rufipogon</i> | China                 | 19.50 | 109.50 | <i>Or-III</i> | NB-like |
| W3064 | <i>O. rufipogon</i> | China                 | 19.25 | 110.46 | <i>Or-III</i> | NB-like |
| W3065 | <i>O. rufipogon</i> | China                 | 19.25 | 110.46 | <i>Or-III</i> | NB-like |
| W3066 | <i>O. rufipogon</i> | China                 | 18.75 | 109.17 | <i>Or-III</i> | NB-like |
| W3073 | <i>O. rufipogon</i> | China                 | 19.62 | 110.70 | <i>Or-III</i> | NB-like |
| W3076 | <i>O. rufipogon</i> | China                 | 28.23 | 116.61 | <i>Or-III</i> | NB-like |
| W3077 | <i>O. rufipogon</i> | China                 | 28.23 | 116.61 | <i>Or-III</i> | NB-like |
| W3078 | <i>O. rufipogon</i> | China                 | 28.23 | 116.61 | <i>Or-III</i> | NB-like |
| W3079 | <i>O. rufipogon</i> | China                 | 28.23 | 116.61 | <i>Or-III</i> | NB-like |
| W3080 | <i>O. rufipogon</i> | China                 | 28.23 | 116.61 | <i>Or-III</i> | NB-like |
| W3081 | <i>O. rufipogon</i> | China                 | 28.23 | 116.61 | <i>Or-III</i> | NB-like |
| W3082 | <i>O. rufipogon</i> | China                 | 28.23 | 116.61 | <i>Or-III</i> | NB-like |
| W3092 | <i>O. rufipogon</i> | China                 | 26.80 | 113.55 | <i>Or-III</i> | NB-like |
| W3094 | <i>O. rufipogon</i> | China                 | 25.28 | 111.34 | <i>Or-III</i> | NB-like |
| W3095 | <i>O. rufipogon</i> | China                 | 25.28 | 111.34 | <i>Or-III</i> | NB-like |
| W3096 | <i>O. rufipogon</i> | China                 | 25.28 | 111.34 | <i>Or-III</i> | NB-like |
| W3097 | <i>O. rufipogon</i> | China                 | 25.28 | 111.34 | <i>Or-II</i>  | NB-like |
| W3098 | <i>O. rufipogon</i> | China                 | 25.28 | 111.34 | <i>Or-II</i>  | NB-like |
| W3105 | <i>O. rufipogon</i> | India                 | NA    | NA     | <i>Or-I</i>   | NB-like |
| W1854 | <i>O. rufipogon</i> | Thailand              | 19.64 | 99.52  | <i>Or-II</i>  | NB-like |
| W0101 | <i>O. rufipogon</i> | India                 | 20.48 | 85.85  | <i>Or-I</i>   | HN-like |
| W0102 | <i>O. rufipogon</i> | India                 | 20.48 | 85.85  | <i>Or-I</i>   | HN-like |
| W0120 | <i>O. rufipogon</i> | India                 | 20.46 | 85.88  | <i>Or-II</i>  | HN-like |
| W0128 | <i>O. rufipogon</i> | India                 | 21.00 | 85.10  | <i>Or-I</i>   | HN-like |
| W0132 | <i>O. rufipogon</i> | India                 | 17.05 | 82.18  | <i>Or-II</i>  | HN-like |
| W0145 | <i>O. rufipogon</i> | Thailand              | 13.72 | 100.48 | <i>Or-II</i>  | HN-like |
| W0149 | <i>O. rufipogon</i> | India                 | 23.48 | 81.10  | <i>Or-III</i> | HN-like |
| W0151 | <i>O. rufipogon</i> | India                 | 23.48 | 81.10  | <i>Or-I</i>   | HN-like |
| W0157 | <i>O. rufipogon</i> | India                 | 26.59 | 94.19  | <i>Or-II</i>  | HN-like |
| W0168 | <i>O. rufipogon</i> | Thailand              | 15.22 | 102.50 | <i>Or-I</i>   | HN-like |
| W0170 | <i>O. rufipogon</i> | Thailand              | 15.87 | 100.99 | <i>Or-I</i>   | HN-like |
| W0178 | <i>O. rufipogon</i> | Thailand              | 14.33 | 100.53 | <i>Or-I</i>   | HN-like |
| W0179 | <i>O. rufipogon</i> | Thailand              | 17.42 | 102.78 | <i>Or-I</i>   | HN-like |
| W0576 | <i>O. rufipogon</i> | Malaya                | 5.80  | 102.38 | <i>Or-II</i>  | HN-like |
| W0587 | <i>O. rufipogon</i> | Malaya                | 5.70  | 102.53 | <i>Or-II</i>  | HN-like |
| W0600 | <i>O. rufipogon</i> | Malaya                | 5.14  | 102.81 | <i>Or-II</i>  | HN-like |
| W0621 | <i>O. rufipogon</i> | Burma                 | 17.33 | 96.50  | <i>Or-III</i> | HN-like |
| W0623 | <i>O. rufipogon</i> | Burma                 | 17.55 | 96.62  | <i>Or-III</i> | HN-like |
| W0629 | <i>O. rufipogon</i> | Burma                 | 20.40 | 92.85  | <i>Or-III</i> | HN-like |
| W0634 | <i>O. rufipogon</i> | Burma                 | 25.38 | 97.39  | <i>Or-II</i>  | HN-like |
| W1093 | <i>O. rufipogon</i> | India                 | 26.15 | 91.74  | <i>Or-II</i>  | HN-like |
| W1102 | <i>O. rufipogon</i> | India                 | 26.20 | 92.94  | <i>Or-III</i> | HN-like |
| W1114 | <i>O. rufipogon</i> | India                 | 26.82 | 94.17  | <i>Or-III</i> | HN-like |
| W1122 | <i>O. rufipogon</i> | India                 | 26.82 | 94.17  | <i>Or-II</i>  | HN-like |
| W1124 | <i>O. rufipogon</i> | India                 | 26.59 | 94.20  | <i>Or-II</i>  | HN-like |
| W1126 | <i>O. rufipogon</i> | India                 | 24.86 | 92.36  | <i>Or-II</i>  | HN-like |
| W1214 | <i>O. rufipogon</i> | Philippines           | 7.86  | 124.86 | <i>Or-III</i> | HN-like |
| W1230 | <i>O. rufipogon</i> | Dutch New Guinea      | -4.63 | 138.93 | <i>Or-I</i>   | HN-like |
| W1236 | <i>O. rufipogon</i> | Australian New Guinea | -5.31 | 141.61 | <i>Or-II</i>  | HN-like |
| W1546 | <i>O. rufipogon</i> | Thailand              | 14.50 | 100.89 | <i>Or-I</i>   | HN-like |

|       |                     |            |       |        |               |         |
|-------|---------------------|------------|-------|--------|---------------|---------|
| W1547 | <i>O. rufipogon</i> | Thailand   | 14.50 | 100.89 | <i>Or-I</i>   | HN-like |
| W1550 | <i>O. rufipogon</i> | Thailand   | 18.80 | 98.66  | <i>Or-II</i>  | HN-like |
| W1551 | <i>O. rufipogon</i> | Thailand   | 14.50 | 100.89 | <i>Or-I</i>   | HN-like |
| W1552 | <i>O. rufipogon</i> | Thailand   | 14.33 | 100.52 | <i>Or-II</i>  | HN-like |
| W1555 | <i>O. rufipogon</i> | Thailand   | 15.00 | 100.00 | <i>Or-II</i>  | HN-like |
| W1559 | <i>O. rufipogon</i> | Thailand   | 15.00 | 100.00 | <i>Or-I</i>   | HN-like |
| W1668 | <i>O. rufipogon</i> | India      | 18.52 | 82.46  | <i>Or-III</i> | HN-like |
| W1683 | <i>O. rufipogon</i> | India      | 20.10 | 84.48  | <i>Or-II</i>  | HN-like |
| W1687 | <i>O. rufipogon</i> | India      | 23.04 | 88.17  | <i>Or-II</i>  | HN-like |
| W1690 | <i>O. rufipogon</i> | Thailand   | 19.41 | 99.34  | <i>Or-I</i>   | HN-like |
| W1695 | <i>O. rufipogon</i> | Thailand   | 19.45 | 99.44  | <i>Or-I</i>   | HN-like |
| W1700 | <i>O. rufipogon</i> | Thailand   | 14.30 | 100.55 | <i>Or-I</i>   | HN-like |
| W1726 | <i>O. rufipogon</i> | Thailand   | 15.00 | 100.00 | <i>Or-I</i>   | HN-like |
| W1727 | <i>O. rufipogon</i> | Thailand   | 15.00 | 100.00 | <i>Or-I</i>   | HN-like |
| W1731 | <i>O. rufipogon</i> | India      | 20.46 | 85.88  | <i>Or-I</i>   | HN-like |
| W1742 | <i>O. rufipogon</i> | India      | 26.92 | 75.82  | <i>Or-II</i>  | HN-like |
| W1746 | <i>O. rufipogon</i> | India      | 26.92 | 75.82  | <i>Or-III</i> | HN-like |
| W1748 | <i>O. rufipogon</i> | India      | 26.92 | 75.82  | <i>Or-III</i> | HN-like |
| W1749 | <i>O. rufipogon</i> | India      | 18.40 | 81.68  | <i>Or-I</i>   | HN-like |
| W1754 | <i>O. rufipogon</i> | India      | 20.27 | 81.50  | <i>Or-I</i>   | HN-like |
| W1784 | <i>O. rufipogon</i> | India      | 12.31 | 76.66  | <i>Or-III</i> | HN-like |
| W1787 | <i>O. rufipogon</i> | Thailand   | 15.00 | 100.00 | <i>Or-I</i>   | HN-like |
| W1790 | <i>O. rufipogon</i> | Thailand   | 15.00 | 100.00 | <i>Or-II</i>  | HN-like |
| W1792 | <i>O. rufipogon</i> | Thailand   | 15.00 | 100.00 | <i>Or-I</i>   | HN-like |
| W1798 | <i>O. rufipogon</i> | Thailand   | 15.00 | 100.00 | <i>Or-II</i>  | HN-like |
| W1810 | <i>O. rufipogon</i> | Sri Lanka  | 6.93  | 79.95  | <i>Or-II</i>  | HN-like |
| W1811 | <i>O. rufipogon</i> | Sri Lanka  | 6.93  | 79.95  | <i>Or-III</i> | HN-like |
| W1825 | <i>O. rufipogon</i> | Bangladesh | 23.71 | 90.41  | <i>Or-I</i>   | HN-like |
| W1858 | <i>O. rufipogon</i> | Thailand   | 17.53 | 100.12 | <i>Or-II</i>  | HN-like |
| W1859 | <i>O. rufipogon</i> | Thailand   | 17.52 | 100.12 | <i>Or-II</i>  | HN-like |
| W1862 | <i>O. rufipogon</i> | Thailand   | 16.82 | 100.34 | <i>Or-II</i>  | HN-like |
| W1866 | <i>O. rufipogon</i> | Thailand   | 14.57 | 100.99 | <i>Or-I</i>   | HN-like |
| W1873 | <i>O. rufipogon</i> | Thailand   | 16.35 | 102.86 | <i>Or-II</i>  | HN-like |
| W1882 | <i>O. rufipogon</i> | Thailand   | 17.03 | 102.91 | <i>Or-II</i>  | HN-like |
| W1891 | <i>O. rufipogon</i> | Thailand   | 17.85 | 102.75 | <i>Or-II</i>  | HN-like |
| W1893 | <i>O. rufipogon</i> | Thailand   | 17.35 | 102.89 | <i>Or-I</i>   | HN-like |
| W1895 | <i>O. rufipogon</i> | Thailand   | 17.25 | 104.18 | <i>Or-II</i>  | HN-like |
| W1896 | <i>O. rufipogon</i> | Thailand   | 17.25 | 104.18 | <i>Or-II</i>  | HN-like |
| W1912 | <i>O. rufipogon</i> | Thailand   | 15.05 | 104.10 | <i>Or-I</i>   | HN-like |
| W1916 | <i>O. rufipogon</i> | Thailand   | 14.92 | 103.51 | <i>Or-II</i>  | HN-like |
| W1919 | <i>O. rufipogon</i> | Thailand   | 14.73 | 102.19 | <i>Or-II</i>  | HN-like |
| W1927 | <i>O. rufipogon</i> | Thailand   | 15.46 | 100.13 | <i>Or-II</i>  | HN-like |
| W1971 | <i>O. rufipogon</i> | Indonesia  | -6.40 | 106.82 | <i>Or-II</i>  | HN-like |
| W1972 | <i>O. rufipogon</i> | Indonesia  | -6.40 | 106.82 | <i>Or-II</i>  | HN-like |
| W1973 | <i>O. rufipogon</i> | Indonesia  | -6.40 | 106.82 | <i>Or-III</i> | HN-like |
| W1977 | <i>O. rufipogon</i> | Indonesia  | -6.40 | 106.82 | <i>Or-II</i>  | HN-like |
| W2005 | <i>O. rufipogon</i> | India      | 15.35 | 74.20  | <i>Or-III</i> | HN-like |
| W2017 | <i>O. rufipogon</i> | Indonesia  | -7.60 | 110.70 | <i>Or-II</i>  | HN-like |
| W2022 | <i>O. rufipogon</i> | Indonesia  | 3.29  | 117.00 | <i>Or-II</i>  | HN-like |
| W2025 | <i>O. rufipogon</i> | Indonesia  | 3.29  | 117.00 | <i>Or-II</i>  | HN-like |
| W2030 | <i>O. rufipogon</i> | Indonesia  | -3.00 | 105.00 | <i>Or-II</i>  | HN-like |
| W2036 | <i>O. rufipogon</i> | Burma      | 17.33 | 96.50  | <i>Or-III</i> | HN-like |
| W2055 | <i>O. rufipogon</i> | Bangladesh | 24.48 | 91.78  | <i>Or-II</i>  | HN-like |

|       |                     |            |        |        |               |         |
|-------|---------------------|------------|--------|--------|---------------|---------|
| W2056 | <i>O. rufipogon</i> | Bangladesh | 24.48  | 91.78  | <i>Or-II</i>  | HN-like |
| W2078 | <i>O. rufipogon</i> | Australia  | -14.30 | 132.40 | <i>Or-III</i> | HN-like |
| W2099 | <i>O. rufipogon</i> | Australia  | -13.07 | 142.07 | <i>Or-III</i> | HN-like |
| W2108 | <i>O. rufipogon</i> | Australia  | -13.07 | 142.07 | <i>Or-III</i> | HN-like |
| W2197 | <i>O. rufipogon</i> | Indonesia  | 3.29   | 117.00 | <i>Or-II</i>  | HN-like |
| W2263 | <i>O. rufipogon</i> | Cambodia   | 11.33  | 104.50 | <i>Or-I</i>   | HN-like |
| W2264 | <i>O. rufipogon</i> | Vietnam    | 10.20  | 105.47 | <i>Or-II</i>  | HN-like |
| W2266 | <i>O. rufipogon</i> | Laos       | 18.01  | 102.39 | <i>Or-II</i>  | HN-like |
| W2268 | <i>O. rufipogon</i> | Thailand   | 14.35  | 101.00 | <i>Or-I</i>   | HN-like |
| W2275 | <i>O. rufipogon</i> | Thailand   | 16.09  | 100.37 | <i>Or-I</i>   | HN-like |
| W2277 | <i>O. rufipogon</i> | Thailand   | 15.13  | 100.12 | <i>Or-I</i>   | HN-like |
| W2278 | <i>O. rufipogon</i> | Thailand   | 14.30  | 100.31 | <i>Or-I</i>   | HN-like |
| W2282 | <i>O. rufipogon</i> | Thailand   | 16.49  | 99.47  | <i>Or-II</i>  | HN-like |
| W2284 | <i>O. rufipogon</i> | Thailand   | 16.49  | 99.47  | <i>Or-II</i>  | HN-like |
| W2296 | <i>O. rufipogon</i> | Cambodia   | 11.32  | 104.50 | <i>Or-I</i>   | HN-like |
| W2298 | <i>O. rufipogon</i> | Laos       | 15.09  | 105.46 | <i>Or-I</i>   | HN-like |
| W2299 | <i>O. rufipogon</i> | Laos       | 15.09  | 105.46 | <i>Or-I</i>   | HN-like |
| W2301 | <i>O. rufipogon</i> | Laos       | 15.12  | 105.43 | <i>Or-I</i>   | HN-like |
| W2302 | <i>O. rufipogon</i> | Laos       | 15.12  | 105.43 | <i>Or-I</i>   | HN-like |
| W2303 | <i>O. rufipogon</i> | Laos       | 15.06  | 105.49 | <i>Or-I</i>   | HN-like |
| W2304 | <i>O. rufipogon</i> | Laos       | 15.03  | 105.54 | <i>Or-I</i>   | HN-like |
| W2305 | <i>O. rufipogon</i> | Laos       | 14.50  | 105.50 | <i>Or-I</i>   | HN-like |
| W2306 | <i>O. rufipogon</i> | Laos       | 14.50  | 105.50 | <i>Or-I</i>   | HN-like |
| W2311 | <i>O. rufipogon</i> | Laos       | 17.52  | 102.36 | <i>Or-II</i>  | HN-like |
| W2321 | <i>O. rufipogon</i> | Vietnam    | 10.44  | 105.37 | <i>Or-II</i>  | HN-like |
| W2327 | <i>O. rufipogon</i> | Vietnam    | 10.00  | 105.45 | <i>Or-II</i>  | HN-like |
| W2332 | <i>O. rufipogon</i> | Vietnam    | 21.03  | 105.85 | <i>Or-I</i>   | HN-like |
| W3001 | <i>O. rufipogon</i> | China      | 21.38  | 110.25 | <i>Or-III</i> | HN-like |
| W3002 | <i>O. rufipogon</i> | China      | 22.19  | 112.31 | <i>Or-III</i> | HN-like |
| W3012 | <i>O. rufipogon</i> | China      | 23.12  | 113.26 | <i>Or-III</i> | HN-like |
| W3017 | <i>O. rufipogon</i> | China      | 23.05  | 113.75 | <i>Or-III</i> | HN-like |
| W3020 | <i>O. rufipogon</i> | China      | 23.17  | 112.89 | <i>Or-III</i> | HN-like |
| W3033 | <i>O. rufipogon</i> | China      | 22.28  | 109.97 | <i>Or-III</i> | HN-like |
| W3037 | <i>O. rufipogon</i> | China      | 23.07  | 109.36 | <i>Or-III</i> | HN-like |
| W3042 | <i>O. rufipogon</i> | China      | 22.75  | 108.49 | <i>Or-III</i> | HN-like |
| W3045 | <i>O. rufipogon</i> | China      | 22.69  | 109.27 | <i>Or-III</i> | HN-like |
| W3046 | <i>O. rufipogon</i> | China      | 22.69  | 109.27 | <i>Or-III</i> | HN-like |
| W3047 | <i>O. rufipogon</i> | China      | 23.73  | 106.91 | <i>Or-III</i> | HN-like |
| W3049 | <i>O. rufipogon</i> | China      | 23.90  | 106.61 | <i>Or-III</i> | HN-like |
| W3051 | <i>O. rufipogon</i> | China      | 23.90  | 106.61 | <i>Or-III</i> | HN-like |
| W3052 | <i>O. rufipogon</i> | China      | 23.73  | 106.91 | <i>Or-III</i> | HN-like |
| W3057 | <i>O. rufipogon</i> | China      | 19.50  | 109.50 | <i>Or-III</i> | HN-like |
| W3058 | <i>O. rufipogon</i> | China      | 19.10  | 109.00 | <i>Or-III</i> | HN-like |
| W3061 | <i>O. rufipogon</i> | China      | 18.75  | 109.17 | <i>Or-III</i> | HN-like |
| W3067 | <i>O. rufipogon</i> | China      | 18.65  | 109.80 | <i>Or-II</i>  | HN-like |
| W3069 | <i>O. rufipogon</i> | China      | 18.65  | 109.80 | <i>Or-III</i> | HN-like |
| W3070 | <i>O. rufipogon</i> | China      | 18.65  | 109.80 | <i>Or-III</i> | HN-like |
| W3071 | <i>O. rufipogon</i> | China      | 19.62  | 110.70 | <i>Or-III</i> | HN-like |
| W3075 | <i>O. rufipogon</i> | China      | 28.23  | 116.61 | <i>Or-III</i> | HN-like |
| W1766 | <i>O. rufipogon</i> | India      | 21.25  | 81.63  | <i>Or-III</i> | HN-like |
| W2066 | <i>O. rufipogon</i> | Nepal      | 28.60  | 81.60  | <i>Or-III</i> | HN-like |
| W3035 | <i>O. rufipogon</i> | China      | 22.63  | 110.14 | <i>Or-III</i> | HN-like |
| W3040 | <i>O. rufipogon</i> | China      | 23.39  | 110.07 | <i>Or-III</i> | HN-like |

|       |                     |            |       |        |               |       |
|-------|---------------------|------------|-------|--------|---------------|-------|
| W0135 | <i>O. rufipogon</i> | India      | 16.93 | 81.88  | <i>Or-III</i> | other |
| W0166 | <i>O. rufipogon</i> | Thailand   | 18.81 | 98.66  | <i>Or-II</i>  | other |
| W0169 | <i>O. rufipogon</i> | Thailand   | 15.87 | 100.99 | <i>Or-II</i>  | other |
| W0610 | <i>O. rufipogon</i> | Burma      | 16.80 | 96.15  | <i>Or-I</i>   | other |
| W1244 | <i>O. rufipogon</i> | Nepal      | 27.70 | 85.32  | <i>Or-III</i> | other |
| W1534 | <i>O. rufipogon</i> | India      | 28.64 | 77.23  | <i>Or-III</i> | other |
| W1536 | <i>O. rufipogon</i> | Sri Lanka  | 8.03  | 79.84  | <i>Or-III</i> | other |
| W1557 | <i>O. rufipogon</i> | Thailand   | 14.54 | 99.99  | <i>Or-II</i>  | other |
| W1558 | <i>O. rufipogon</i> | Thailand   | 15.20 | 104.90 | <i>Or-II</i>  | other |
| W1560 | <i>O. rufipogon</i> | Thailand   | 14.03 | 100.37 | <i>Or-III</i> | other |
| W1681 | <i>O. rufipogon</i> | India      | 20.09 | 84.45  | <i>Or-I</i>   | other |
| W1725 | <i>O. rufipogon</i> | Thailand   | 15.00 | 100.00 | <i>Or-III</i> | other |
| W1759 | <i>O. rufipogon</i> | India      | 20.27 | 81.50  | <i>Or-III</i> | other |
| W1780 | <i>O. rufipogon</i> | India      | 17.00 | 81.80  | <i>Or-II</i>  | other |
| W1783 | <i>O. rufipogon</i> | India      | 12.36 | 76.63  | <i>Or-III</i> | other |
| W1804 | <i>O. rufipogon</i> | Sri Lanka  | 6.93  | 79.95  | <i>Or-II</i>  | other |
| W1818 | <i>O. rufipogon</i> | Bangladesh | 23.71 | 90.41  | <i>Or-I</i>   | other |
| W1879 | <i>O. rufipogon</i> | Thailand   | 17.03 | 102.91 | <i>Or-I</i>   | other |
| W1981 | <i>O. rufipogon</i> | Indonesia  | -2.99 | 104.76 | <i>Or-II</i>  | other |
| W2021 | <i>O. rufipogon</i> | Indonesia  | 3.29  | 117.00 | <i>Or-II</i>  | other |
| W2024 | <i>O. rufipogon</i> | Indonesia  | 3.29  | 117.00 | <i>Or-II</i>  | other |
| W2288 | <i>O. rufipogon</i> | Cambodia   | 11.04 | 106.09 | <i>Or-II</i>  | other |
| W2307 | <i>O. rufipogon</i> | Laos       | 14.52 | 105.52 | <i>Or-I</i>   | other |
| W3007 | <i>O. rufipogon</i> | China      | 22.38 | 112.69 | <i>Or-III</i> | other |
| W3019 | <i>O. rufipogon</i> | China      | 22.80 | 114.46 | <i>Or-III</i> | other |
| W3025 | <i>O. rufipogon</i> | China      | 23.72 | 113.02 | <i>Or-III</i> | other |
| W3059 | <i>O. rufipogon</i> | China      | 19.10 | 109.00 | <i>Or-III</i> | other |
| W3062 | <i>O. rufipogon</i> | China      | 19.10 | 109.00 | <i>Or-III</i> | other |
| W3063 | <i>O. rufipogon</i> | China      | 19.10 | 109.00 | <i>Or-III</i> | other |
| W3085 | <i>O. rufipogon</i> | China      | 23.60 | 102.01 | <i>Or-III</i> | other |
| W3086 | <i>O. rufipogon</i> | China      | 23.60 | 102.01 | <i>Or-III</i> | other |
| W3087 | <i>O. rufipogon</i> | China      | 23.60 | 102.01 | <i>Or-III</i> | other |
| W3088 | <i>O. rufipogon</i> | China      | 23.60 | 102.01 | <i>Or-III</i> | other |
| W0165 | <i>O. rufipogon</i> | Thailand   | 18.81 | 98.66  | <i>Or-II</i>  | other |
| W1554 | <i>O. rufipogon</i> | Thailand   | 15.09 | 99.99  | <i>Or-II</i>  | other |
| W1715 | <i>O. rufipogon</i> | China      | NA    | NA     | <i>Or-II</i>  | other |
| W2276 | <i>O. rufipogon</i> | Thailand   | 16.49 | 100.21 | <i>Or-II</i>  | other |
| W0624 | <i>O. rufipogon</i> | Burma      | 19.77 | 96.11  | <i>Or-II</i>  | other |
| W1716 | <i>O. rufipogon</i> | China      | NA    | NA     | <i>Or-III</i> | other |
| W1849 | <i>O. rufipogon</i> | Thailand   | 19.56 | 99.70  | <i>Or-II</i>  | other |
| W1865 | <i>O. rufipogon</i> | Thailand   | 14.56 | 100.98 | <i>Or-I</i>   | other |
| W1925 | <i>O. rufipogon</i> | Thailand   | 15.55 | 100.12 | <i>Or-I</i>   | other |
| W2012 | <i>O. rufipogon</i> | India      | 19.80 | 72.55  | <i>Or-III</i> | other |
| W3084 | <i>O. rufipogon</i> | China      | 22.10 | 100.79 | <i>Or-II</i>  | other |
| W3090 | <i>O. rufipogon</i> | China      | 22.10 | 100.79 | <i>Or-II</i>  | other |

**Supplementary Table 4.** Distribution of the potential functional SNP T1592A of *Hwi2* in 1,529 rice accessions.

| Accession ID | Genotype | Ecotype    | Original producing area |
|--------------|----------|------------|-------------------------|
| W1839        | T        | Or-I       | China                   |
| W3019        | T        | Or-III     | China                   |
| HP119        | T        | indica     | China                   |
| HP120        | T        | indica     | China                   |
| HP176        | T        | indica     | China                   |
| HP180        | T        | indica     | China                   |
| HP227        | T        | indica     | China                   |
| HP232        | T        | indica     | China                   |
| HP249        | T        | indica     | China                   |
| HP253        | T        | indica     | China                   |
| HP456        | T        | indica     | China                   |
| HP483        | T        | indica     | China                   |
| HP526        | T        | indica     | China                   |
| HP544        | T        | indica     | China                   |
| HP565        | T        | indica     | China                   |
| HP613        | T        | indica     | China                   |
| HP993        | T        | indica     | China                   |
| HP999        | T        | indica     | China                   |
| GP11         | T        | indica     | Philippine              |
| GP18         | T        | indica     | IRRI                    |
| GP24         | T        | indica     | IRRI                    |
| GP27         | T        | indica     | IRRI                    |
| GP68         | T        | indica     | IRRI                    |
| GP84         | T        | indica     | IRRI                    |
| GP143        | T        | indica     | Philippine              |
| GP587        | T        | indica     | Japan                   |
| GP635        | T        | intermedia | North Korea             |
| GP639        | T        | indica     | North Korea             |
| GP652        | T        | indica     | North Korea             |
| GP658        | T        | intermedia | Brazil                  |
| GP716        | T        | indica     | North Korea             |
| GP767        | T        | indica     | North Korea             |
| GP772        | T        | indica     | North Korea             |
| W0101        | A        | Or-I       | India                   |
| W0102        | A        | Or-I       | India                   |
| W0103        | A        | Or-I       | India                   |
| W0106        | A        | Or-I       | India                   |
| W0107        | A        | Or-I       | India                   |
| W0125        | A        | Or-III     | India                   |
| W0126        | A        | Or-III     | India                   |
| W0132        | A        | Or-II      | India                   |
| W0133        | A        | Or-III     | India                   |
| W0134        | A        | Or-III     | India                   |
| W0136        | A        | Or-III     | India                   |
| W0137        | A        | Or-III     | India                   |
| W0143        | A        | Or-II      | Sri Lanka               |
| W0144        | A        | Or-I       | Sri Lanka               |
| W0145        | A        | Or-II      | Thailand                |
| W0148        | A        | Or-I       | India                   |
| W0149        | A        | Or-III     | India                   |
| W0151        | A        | Or-I       | India                   |
| W0152        | A        | Or-I       | India                   |
| W0163        | A        | Or-II      | Thailand                |
| W0164        | A        | Or-II      | Thailand                |



|       |   |        |                       |
|-------|---|--------|-----------------------|
| W0166 | A | Or-II  | Thailand              |
| W0169 | A | Or-II  | Thailand              |
| W0170 | A | Or-I   | Thailand              |
| W0172 | A | Or-III | Thailand              |
| W0176 | A | Or-I   | Thailand              |
| W0179 | A | Or-I   | Thailand              |
| W0234 | A | Or-II  | Thailand              |
| W0549 | A | Or-III | India                 |
| W0587 | A | Or-II  | Malaya                |
| W0589 | A | Or-I   | Malaya                |
| W0590 | A | Or-I   | Malaya                |
| W0593 | A | Or-III | Malaya                |
| W0606 | A | Or-II  | Malaya                |
| W0610 | A | Or-I   | Burma                 |
| W0621 | A | Or-III | Burma                 |
| W0624 | A | Or-II  | Burma                 |
| W0626 | A | Or-I   | Burma                 |
| W0638 | A | Or-I   | Burma                 |
| W1080 | A | Or-I   | India                 |
| W1083 | A | Or-I   | India                 |
| W1086 | A | Or-I   | India                 |
| W1111 | A | Or-I   | India                 |
| W1112 | A | Or-I   | India                 |
| W1117 | A | Or-I   | India                 |
| W1119 | A | Or-III | India                 |
| W1122 | A | Or-II  | India                 |
| W1124 | A | Or-II  | India                 |
| W1142 | A | Or-I   | India                 |
| W1143 | A | Or-I   | India                 |
| W1214 | A | Or-III | Philippines           |
| W1236 | A | Or-II  | Australian New Guinea |
| W1238 | A | Or-III | Neth. New Guinea      |
| W1244 | A | Or-III | Nepal                 |
| W1292 | A | Or-II  | Indonesia             |
| W1546 | A | Or-I   | Thailand              |
| W1547 | A | Or-I   | Thailand              |
| W1550 | A | Or-II  | Thailand              |
| W1551 | A | Or-I   | Thailand              |
| W1553 | A | Or-II  | Thailand              |
| W1556 | A | Or-II  | Thailand              |
| W1557 | A | Or-II  | Thailand              |
| W1558 | A | Or-II  | Thailand              |
| W1560 | A | Or-III | Thailand              |
| W1675 | A | Or-I   | India                 |
| W1677 | A | Or-I   | India                 |
| W1679 | A | Or-I   | India                 |
| W1681 | A | Or-I   | India                 |
| W1695 | A | Or-I   | Thailand              |
| W1698 | A | Or-I   | Thailand              |
| W1700 | A | Or-I   | Thailand              |
| W1718 | A | Or-II  | China                 |
| W1724 | A | Or-III | China                 |
| W1726 | A | Or-I   | Thailand              |
| W1727 | A | Or-I   | Thailand              |
| W1731 | A | Or-I   | India                 |
| W1732 | A | Or-III | India                 |

|       |   |        |            |
|-------|---|--------|------------|
| W1735 | A | Or-I   | India      |
| W1738 | A | Or-I   | India      |
| W1739 | A | Or-III | India      |
| W1740 | A | Or-I   | India      |
| W1742 | A | Or-II  | India      |
| W1743 | A | Or-I   | India      |
| W1746 | A | Or-III | India      |
| W1747 | A | Or-I   | India      |
| W1748 | A | Or-III | India      |
| W1749 | A | Or-I   | India      |
| W1750 | A | Or-I   | India      |
| W1753 | A | Or-I   | India      |
| W1754 | A | Or-I   | India      |
| W1757 | A | Or-I   | India      |
| W1759 | A | Or-III | India      |
| W1761 | A | Or-I   | India      |
| W1766 | A | Or-III | India      |
| W1770 | A | Or-I   | India      |
| W1777 | A | Or-III | India      |
| W1780 | A | Or-II  | India      |
| W1782 | A | Or-III | India      |
| W1787 | A | Or-I   | Thailand   |
| W1788 | A | Or-I   | Thailand   |
| W1790 | A | Or-II  | Thailand   |
| W1792 | A | Or-I   | Thailand   |
| W1794 | A | Or-I   | Thailand   |
| W1795 | A | Or-I   | Thailand   |
| W1798 | A | Or-II  | Thailand   |
| W1802 | A | Or-I   | Bangladesh |
| W1804 | A | Or-II  | Sri Lanka  |
| W1806 | A | Or-I   | Sri Lanka  |
| W1807 | A | Or-III | Sri Lanka  |
| W1809 | A | Or-III | Sri Lanka  |
| W1810 | A | Or-II  | Sri Lanka  |
| W1811 | A | Or-III | Sri Lanka  |
| W1818 | A | Or-I   | Bangladesh |
| W1819 | A | Or-I   | Bangladesh |
| W1820 | A | Or-I   | Bangladesh |
| W1821 | A | Or-I   | Bangladesh |
| W1822 | A | Or-I   | Bangladesh |
| W1823 | A | Or-I   | Bangladesh |
| W1824 | A | Or-I   | Bangladesh |
| W1825 | A | Or-I   | Bangladesh |
| W1849 | A | Or-II  | Thailand   |
| W1850 | A | Or-II  | Thailand   |
| W1852 | A | Or-I   | Thailand   |
| W1853 | A | Or-I   | Thailand   |
| W1854 | A | Or-II  | Thailand   |
| W1857 | A | Or-II  | Thailand   |
| W1858 | A | Or-II  | Thailand   |
| W1859 | A | Or-II  | Thailand   |
| W1862 | A | Or-II  | Thailand   |
| W1865 | A | Or-I   | Thailand   |
| W1866 | A | Or-I   | Thailand   |
| W1870 | A | Or-II  | Thailand   |
| W1880 | A | Or-II  | Thailand   |

|       |   |        |            |
|-------|---|--------|------------|
| W1882 | A | Or-II  | Thailand   |
| W1890 | A | Or-II  | Thailand   |
| W1891 | A | Or-II  | Thailand   |
| W1893 | A | Or-I   | Thailand   |
| W1895 | A | Or-II  | Thailand   |
| W1896 | A | Or-II  | Thailand   |
| W1914 | A | Or-I   | Thailand   |
| W1916 | A | Or-II  | Thailand   |
| W1919 | A | Or-II  | Thailand   |
| W1925 | A | Or-I   | Thailand   |
| W1927 | A | Or-II  | Thailand   |
| W1928 | A | Or-I   | Thailand   |
| W1935 | A | Or-I   | Thailand   |
| W1939 | A | Or-II  | Thailand   |
| W1940 | A | Or-II  | Thailand   |
| W1945 | A | Or-III | China      |
| W1952 | A | Or-III | China      |
| W1958 | A | Or-III | China      |
| W1959 | A | Or-I   | China      |
| W1963 | A | Or-III | China      |
| W1970 | A | Or-I   | Indonesia  |
| W1972 | A | Or-II  | Indonesia  |
| W1973 | A | Or-III | Indonesia  |
| W1974 | A | Or-II  | Indonesia  |
| W1975 | A | Or-II  | Indonesia  |
| W1976 | A | Or-II  | Indonesia  |
| W1977 | A | Or-II  | Indonesia  |
| W1978 | A | Or-II  | Indonesia  |
| W1983 | A | Or-I   | India      |
| W1989 | A | Or-III | India      |
| W1990 | A | Or-III | India      |
| W1991 | A | Or-III | India      |
| W1998 | A | Or-III | India      |
| W2003 | A | Or-III | India      |
| W2005 | A | Or-III | India      |
| W2007 | A | Or-III | India      |
| W2010 | A | Or-III | India      |
| W2014 | A | Or-III | India      |
| W2021 | A | Or-II  | Indonesia  |
| W2022 | A | Or-II  | Indonesia  |
| W2024 | A | Or-II  | Indonesia  |
| W2025 | A | Or-II  | Indonesia  |
| W2030 | A | Or-II  | Indonesia  |
| W2036 | A | Or-III | Burma      |
| W2050 | A | Or-II  | Bangladesh |
| W2051 | A | Or-II  | Bangladesh |
| W2052 | A | Or-II  | Bangladesh |
| W2053 | A | Or-I   | Bangladesh |
| W2055 | A | Or-II  | Bangladesh |
| W2056 | A | Or-II  | Bangladesh |
| W2060 | A | Or-I   | Bangladesh |
| W2061 | A | Or-I   | Bangladesh |
| W2063 | A | Or-I   | Bangladesh |
| W2064 | A | Or-I   | Bangladesh |
| W2066 | A | Or-III | Nepal      |
| W2197 | A | Or-II  | Indonesia  |

|       |   |        |          |
|-------|---|--------|----------|
| W2198 | A | Or-III | China    |
| W2263 | A | Or-I   | Cambodia |
| W2265 | A | Or-I   | Laos     |
| W2266 | A | Or-II  | Laos     |
| W2268 | A | Or-I   | Thailand |
| W2269 | A | Or-I   | Thailand |
| W2271 | A | Or-I   | Thailand |
| W2272 | A | Or-II  | Thailand |
| W2275 | A | Or-I   | Thailand |
| W2277 | A | Or-I   | Thailand |
| W2278 | A | Or-I   | Thailand |
| W2283 | A | Or-II  | Thailand |
| W2288 | A | Or-II  | Cambodia |
| W2296 | A | Or-I   | Cambodia |
| W2298 | A | Or-I   | Laos     |
| W2299 | A | Or-I   | Laos     |
| W2302 | A | Or-I   | Laos     |
| W2304 | A | Or-I   | Laos     |
| W2305 | A | Or-I   | Laos     |
| W2306 | A | Or-I   | Laos     |
| W2307 | A | Or-I   | Laos     |
| W2311 | A | Or-II  | Laos     |
| W2316 | A | Or-I   | Vietnam  |
| W2318 | A | Or-II  | Vietnam  |
| W2319 | A | Or-I   | Vietnam  |
| W2321 | A | Or-II  | Vietnam  |
| W2322 | A | Or-II  | Vietnam  |
| W2331 | A | Or-I   | Vietnam  |
| W2332 | A | Or-I   | Vietnam  |
| W3002 | A | Or-III | China    |
| W3007 | A | Or-III | China    |
| W3009 | A | Or-III | China    |
| W3010 | A | Or-III | China    |
| W3012 | A | Or-III | China    |
| W3013 | A | Or-III | China    |
| W3014 | A | Or-III | China    |
| W3015 | A | Or-III | China    |
| W3016 | A | Or-III | China    |
| W3017 | A | Or-III | China    |
| W3018 | A | Or-III | China    |
| W3021 | A | Or-III | China    |
| W3023 | A | Or-III | China    |
| W3027 | A | Or-III | China    |
| W3030 | A | Or-III | China    |
| W3031 | A | Or-III | China    |
| W3032 | A | Or-III | China    |
| W3033 | A | Or-III | China    |
| W3034 | A | Or-III | China    |
| W3035 | A | Or-III | China    |
| W3039 | A | Or-III | China    |
| W3040 | A | Or-III | China    |
| W3044 | A | Or-III | China    |
| W3045 | A | Or-III | China    |
| W3046 | A | Or-III | China    |
| W3049 | A | Or-III | China    |
| W3050 | A | Or-III | China    |

|       |   |                    |       |
|-------|---|--------------------|-------|
| W3051 | A | Or-III             | China |
| W3052 | A | Or-III             | China |
| W3053 | A | Or-III             | China |
| W3054 | A | Or-III             | China |
| W3055 | A | Or-III             | China |
| W3059 | A | Or-III             | China |
| W3060 | A | Or-III             | China |
| W3062 | A | Or-III             | China |
| W3064 | A | Or-III             | China |
| W3065 | A | Or-III             | China |
| W3066 | A | Or-III             | China |
| W3068 | A | Or-II              | China |
| W3069 | A | Or-III             | China |
| W3070 | A | Or-III             | China |
| W3071 | A | Or-III             | China |
| W3073 | A | Or-III             | China |
| W3077 | A | Or-III             | China |
| W3078 | A | Or-III             | China |
| W3079 | A | Or-III             | China |
| W3080 | A | Or-III             | China |
| W3082 | A | Or-III             | China |
| W3084 | A | Or-II              | China |
| W3085 | A | Or-III             | China |
| W3089 | A | Or-II              | China |
| W3092 | A | Or-III             | China |
| W3094 | A | Or-III             | China |
| W3096 | A | Or-III             | China |
| W3105 | A | Or-I               | India |
| HP2   | A | temperate japonica | China |
| HP6   | A | temperate japonica | China |
| HP9   | A | temperate japonica | China |
| HP10  | A | temperate japonica | China |
| HP14  | A | temperate japonica | China |
| HP15  | A | temperate japonica | China |
| HP17  | A | temperate japonica | China |
| HP19  | A | temperate japonica | China |
| HP20  | A | temperate japonica | China |
| HP22  | A | temperate japonica | China |
| HP23  | A | temperate japonica | China |
| HP25  | A | temperate japonica | China |
| HP29  | A | temperate japonica | China |
| HP31  | A | temperate japonica | China |
| HP35  | A | temperate japonica | China |
| HP36  | A | temperate japonica | China |
| HP37  | A | temperate japonica | China |
| HP39  | A | temperate japonica | China |
| HP42  | A | indica             | China |
| HP43  | A | temperate japonica | China |
| HP44  | A | temperate japonica | China |
| HP45  | A | temperate japonica | China |
| HP46  | A | temperate japonica | China |
| HP47  | A | intermedia         | China |
| HP49  | A | temperate japonica | China |
| HP50  | A | temperate japonica | China |
| HP53  | A | temperate japonica | China |
| HP55  | A | temperate japonica | China |

|       |   |                    |       |
|-------|---|--------------------|-------|
| HP57  | A | temperate japonica | China |
| HP59  | A | temperate japonica | China |
| HP60  | A | temperate japonica | China |
| HP68  | A | temperate japonica | China |
| HP71  | A | indica             | China |
| HP72  | A | temperate japonica | China |
| HP73  | A | temperate japonica | China |
| HP78  | A | temperate japonica | China |
| HP80  | A | temperate japonica | China |
| HP81  | A | temperate japonica | China |
| HP84  | A | temperate japonica | China |
| HP85  | A | temperate japonica | China |
| HP86  | A | temperate japonica | China |
| HP88  | A | temperate japonica | China |
| HP91  | A | temperate japonica | China |
| HP93  | A | temperate japonica | China |
| HP95  | A | temperate japonica | China |
| HP97  | A | temperate japonica | China |
| HP99  | A | temperate japonica | China |
| HP105 | A | temperate japonica | China |
| HP106 | A | temperate japonica | China |
| HP108 | A | temperate japonica | China |
| HP109 | A | temperate japonica | China |
| HP110 | A | temperate japonica | China |
| HP112 | A | temperate japonica | China |
| HP113 | A | temperate japonica | China |
| HP114 | A | temperate japonica | China |
| HP115 | A | temperate japonica | China |
| HP116 | A | temperate japonica | China |
| HP127 | A | temperate japonica | China |
| HP128 | A | temperate japonica | China |
| HP129 | A | temperate japonica | China |
| HP130 | A | temperate japonica | China |
| HP132 | A | temperate japonica | China |
| HP133 | A | temperate japonica | China |
| HP135 | A | temperate japonica | China |
| HP137 | A | temperate japonica | China |
| HP142 | A | temperate japonica | China |
| HP143 | A | indica             | China |
| HP144 | A | indica             | China |
| HP145 | A | temperate japonica | China |
| HP148 | A | temperate japonica | China |
| HP151 | A | temperate japonica | China |
| HP156 | A | temperate japonica | China |
| HP159 | A | temperate japonica | China |
| HP160 | A | temperate japonica | China |
| HP163 | A | temperate japonica | China |
| HP165 | A | temperate japonica | China |
| HP166 | A | temperate japonica | China |
| HP169 | A | temperate japonica | China |
| HP172 | A | temperate japonica | China |
| HP173 | A | temperate japonica | China |
| HP174 | A | indica             | China |
| HP175 | A | temperate japonica | China |
| HP178 | A | intermedia         | China |
| HP179 | A | indica             | China |

|       |   |                    |       |
|-------|---|--------------------|-------|
| HP182 | A | indica             | China |
| HP184 | A | indica             | China |
| HP187 | A | indica             | China |
| HP188 | A | indica             | China |
| HP190 | A | indica             | China |
| HP192 | A | indica             | China |
| HP193 | A | indica             | China |
| HP195 | A | indica             | China |
| HP198 | A | indica             | China |
| HP199 | A | indica             | China |
| HP202 | A | indica             | China |
| HP204 | A | indica             | China |
| HP205 | A | indica             | China |
| HP206 | A | indica             | China |
| HP207 | A | indica             | China |
| HP211 | A | indica             | China |
| HP214 | A | indica             | China |
| HP216 | A | indica             | China |
| HP218 | A | indica             | China |
| HP219 | A | indica             | China |
| HP220 | A | indica             | China |
| HP221 | A | indica             | China |
| HP223 | A | intermedia         | China |
| HP231 | A | indica             | China |
| HP241 | A | temperate japonica | China |
| HP246 | A | indica             | China |
| HP247 | A | indica             | China |
| HP248 | A | indica             | China |
| HP250 | A | indica             | China |
| HP251 | A | indica             | China |
| HP252 | A | indica             | China |
| HP254 | A | indica             | China |
| HP256 | A | temperate japonica | China |
| HP257 | A | indica             | China |
| HP258 | A | temperate japonica | China |
| HP262 | A | indica             | China |
| HP265 | A | indica             | China |
| HP266 | A | indica             | China |
| HP270 | A | indica             | China |
| HP273 | A | indica             | China |
| HP274 | A | indica             | China |
| HP275 | A | temperate japonica | China |
| HP276 | A | indica             | China |
| HP277 | A | indica             | China |
| HP278 | A | temperate japonica | China |
| HP280 | A | temperate japonica | China |
| HP281 | A | indica             | China |
| HP282 | A | temperate japonica | China |
| HP283 | A | temperate japonica | China |
| HP285 | A | indica             | China |
| HP290 | A | indica             | China |
| HP291 | A | indica             | China |
| HP293 | A | intermedia         | China |
| HP298 | A | indica             | China |
| HP302 | A | indica             | China |
| HP303 | A | indica             | China |

|       |   |                    |       |
|-------|---|--------------------|-------|
| HP304 | A | indica             | China |
| HP305 | A | indica             | China |
| HP307 | A | indica             | China |
| HP313 | A | indica             | China |
| HP316 | A | indica             | China |
| HP317 | A | indica             | China |
| HP320 | A | indica             | China |
| HP324 | A | indica             | China |
| HP325 | A | indica             | China |
| HP328 | A | indica             | China |
| HP329 | A | indica             | China |
| HP331 | A | temperate japonica | China |
| HP334 | A | indica             | China |
| HP338 | A | indica             | China |
| HP342 | A | indica             | China |
| HP343 | A | indica             | China |
| HP344 | A | indica             | China |
| HP345 | A | intermedia         | China |
| HP346 | A | indica             | China |
| HP348 | A | indica             | China |
| HP350 | A | indica             | China |
| HP351 | A | indica             | China |
| HP352 | A | indica             | China |
| HP353 | A | indica             | China |
| HP354 | A | indica             | China |
| HP355 | A | indica             | China |
| HP356 | A | indica             | China |
| HP357 | A | indica             | China |
| HP358 | A | temperate japonica | China |
| HP359 | A | indica             | China |
| HP361 | A | indica             | China |
| HP363 | A | temperate japonica | China |
| HP364 | A | indica             | China |
| HP366 | A | indica             | China |
| HP367 | A | indica             | China |
| HP369 | A | indica             | China |
| HP371 | A | temperate japonica | China |
| HP373 | A | indica             | China |
| HP375 | A | temperate japonica | China |
| HP377 | A | indica             | China |
| HP378 | A | temperate japonica | China |
| HP380 | A | indica             | China |
| HP384 | A | temperate japonica | China |
| HP386 | A | indica             | China |
| HP388 | A | temperate japonica | China |
| HP392 | A | indica             | China |
| HP393 | A | indica             | China |
| HP394 | A | indica             | China |
| HP397 | A | indica             | China |
| HP399 | A | indica             | China |
| HP404 | A | temperate japonica | China |
| HP405 | A | indica             | China |
| HP406 | A | temperate japonica | China |
| HP410 | A | indica             | China |
| HP412 | A | indica             | China |
| HP413 | A | indica             | China |



|       |   |                    |       |
|-------|---|--------------------|-------|
| HP419 | A | indica             | China |
| HP421 | A | temperate japonica | China |
| HP422 | A | indica             | China |
| HP427 | A | indica             | China |
| HP428 | A | indica             | China |
| HP429 | A | indica             | China |
| HP431 | A | indica             | China |
| HP433 | A | indica             | China |
| HP434 | A | indica             | China |
| HP436 | A | temperate japonica | China |
| HP440 | A | indica             | China |
| HP441 | A | indica             | China |
| HP442 | A | indica             | China |
| HP444 | A | indica             | China |
| HP447 | A | indica             | China |
| HP451 | A | indica             | China |
| HP452 | A | indica             | China |
| HP453 | A | indica             | China |
| HP454 | A | temperate japonica | China |
| HP455 | A | indica             | China |
| HP457 | A | indica             | China |
| HP458 | A | indica             | China |
| HP459 | A | indica             | China |
| HP460 | A | indica             | China |
| HP461 | A | indica             | China |
| HP462 | A | temperate japonica | China |
| HP463 | A | indica             | China |
| HP465 | A | indica             | China |
| HP468 | A | temperate japonica | China |
| HP469 | A | indica             | China |
| HP470 | A | indica             | China |
| HP474 | A | indica             | China |
| HP476 | A | indica             | China |
| HP478 | A | indica             | China |
| HP479 | A | indica             | China |
| HP480 | A | indica             | China |
| HP481 | A | indica             | China |
| HP482 | A | indica             | China |
| HP485 | A | indica             | China |
| HP487 | A | indica             | China |
| HP492 | A | indica             | China |
| HP493 | A | indica             | China |
| HP494 | A | indica             | China |
| HP495 | A | indica             | China |
| HP496 | A | indica             | China |
| HP498 | A | indica             | China |
| HP500 | A | indica             | China |
| HP502 | A | indica             | China |
| HP505 | A | indica             | China |
| HP506 | A | indica             | China |
| HP507 | A | indica             | China |
| HP508 | A | indica             | China |
| HP509 | A | indica             | China |
| HP510 | A | indica             | China |
| HP513 | A | indica             | China |
| HP514 | A | indica             | China |

|       |   |                    |             |
|-------|---|--------------------|-------------|
| HP515 | A | indica             | China       |
| HP517 | A | indica             | China       |
| HP518 | A | indica             | China       |
| HP519 | A | intermedia         | China       |
| HP520 | A | indica             | China       |
| HP521 | A | indica             | China       |
| HP527 | A | indica             | China       |
| HP528 | A | indica             | China       |
| HP529 | A | indica             | China       |
| HP531 | A | indica             | China       |
| HP534 | A | indica             | China       |
| HP535 | A | indica             | China       |
| HP536 | A | indica             | China       |
| HP538 | A | indica             | China       |
| HP541 | A | indica             | China       |
| HP542 | A | indica             | China       |
| HP545 | A | indica             | China       |
| HP546 | A | indica             | China       |
| HP547 | A | indica             | China       |
| HP548 | A | indica             | China       |
| HP553 | A | indica             | China       |
| HP555 | A | indica             | China       |
| HP556 | A | indica             | China       |
| HP557 | A | indica             | China       |
| HP561 | A | indica             | China       |
| HP568 | A | temperate japonica | China       |
| HP571 | A | indica             | China       |
| HP572 | A | indica             | China       |
| HP582 | A | indica             | China       |
| HP583 | A | indica             | China       |
| HP586 | A | temperate japonica | China       |
| HP587 | A | temperate japonica | China       |
| HP588 | A | temperate japonica | China       |
| HP589 | A | indica             | China       |
| HP590 | A | indica             | China       |
| HP591 | A | indica             | China       |
| HP596 | A | temperate japonica | China       |
| HP597 | A | indica             | China       |
| HP599 | A | temperate japonica | China       |
| HP600 | A | indica             | China       |
| HP603 | A | indica             | China       |
| HP604 | A | indica             | China       |
| HP605 | A | temperate japonica | China       |
| HP607 | A | indica             | China       |
| HP608 | A | indica             | China       |
| HP614 | A | intermedia         | China       |
| HP995 | A | temperate japonica | China       |
| HP996 | A | temperate japonica | Japan       |
| GP1   | A | intermedia         | Bengal      |
| GP34  | A | aus                | India       |
| GP36  | A | aus                | Bengal      |
| GP43  | A | indica             | India       |
| GP44  | A | intermedia         | India       |
| GP46  | A | indica             | India       |
| GP55  | A | tropical japonica  | Ivory Coast |
| GP58  | A | indica             | India       |

|       |   |                    |             |
|-------|---|--------------------|-------------|
| GP62  | A | aus                | India       |
| GP74  | A | intermedia         | IRRI        |
| GP80  | A | indica             | IRRI        |
| GP86  | A | tropical japonica  | US          |
| GP118 | A | indica             | Indonesia   |
| GP138 | A | indica             | IRRI        |
| GP260 | A | indica             | India       |
| GP284 | A | aromatic           | Pakistan    |
| GP285 | A | aus                | Pakistan    |
| GP294 | A | aromatic           | Pakistan    |
| GP295 | A | aromatic           | Pakistan    |
| GP297 | A | aromatic           | Pakistan    |
| GP497 | A | temperate japonica | Japan       |
| GP502 | A | temperate japonica | Japan       |
| GP507 | A | temperate japonica | Japan       |
| GP512 | A | aus                | Bengal      |
| GP513 | A | tropical japonica  | Philippine  |
| GP522 | A | tropical japonica  | Malaysia    |
| GP530 | A | aus                | India       |
| GP532 | A | tropical japonica  | Brazil      |
| GP537 | A | tropical japonica  | Philippine  |
| GP542 | A | aus                | Philippine  |
| GP561 | A | temperate japonica | Japan       |
| GP568 | A | temperate japonica | Italy       |
| GP574 | A | indica             | Philippine  |
| GP575 | A | temperate japonica | Uganda      |
| GP584 | A | temperate japonica | US          |
| GP588 | A | temperate japonica | Italy       |
| GP591 | A | temperate japonica | North Korea |
| GP596 | A | temperate japonica | Japan       |
| GP597 | A | temperate japonica | South Korea |
| GP599 | A | temperate japonica | South Korea |
| GP603 | A | temperate japonica | South Korea |
| GP605 | A | temperate japonica | South Korea |
| GP610 | A | temperate japonica | South Korea |
| GP611 | A | tropical japonica  | Australia   |
| GP614 | A | temperate japonica | US          |
| GP620 | A | temperate japonica | IRRI        |
| GP624 | A | indica             | Hungary     |
| GP625 | A | aus                | India       |
| GP626 | A | tropical japonica  | Indonesia   |
| GP627 | A | intermedia         | Indonesia   |
| GP628 | A | indica             | Indonesia   |
| GP629 | A | tropical japonica  | Indonesia   |
| GP632 | A | temperate japonica | Japan       |
| GP634 | A | temperate japonica | North Korea |
| GP646 | A | temperate japonica | Thailand    |
| GP647 | A | tropical japonica  | US          |
| GP654 | A | temperate japonica | Italy       |
| GP656 | A | temperate japonica | Japan       |
| GP659 | A | tropical japonica  | Brazil      |
| GP660 | A | temperate japonica | Japan       |
| GP662 | A | temperate japonica | Japan       |
| GP666 | A | temperate japonica | Japan       |
| GP667 | A | temperate japonica | Japan       |
| GP671 | A | temperate japonica | Japan       |

|       |   |                    |             |
|-------|---|--------------------|-------------|
| GP672 | A | temperate japonica | Japan       |
| GP674 | A | temperate japonica | Japan       |
| GP680 | A | temperate japonica | Cuba        |
| GP683 | A | tropical japonica  | Indonesia   |
| GP686 | A | tropical japonica  | Hungary     |
| GP688 | A | tropical japonica  | Indonesia   |
| GP689 | A | intermedia         | Indonesia   |
| GP693 | A | intermedia         | Colombia    |
| GP694 | A | temperate japonica | South Korea |
| GP695 | A | tropical japonica  | Brazil      |
| GP697 | A | tropical japonica  | Ivory Coast |
| GP699 | A | tropical japonica  | Ivory Coast |
| GP700 | A | tropical japonica  | Ivory Coast |
| GP701 | A | tropical japonica  | Ivory Coast |
| GP702 | A | temperate japonica | South Korea |
| GP704 | A | tropical japonica  | Ivory Coast |
| GP705 | A | tropical japonica  | Ivory Coast |
| GP706 | A | tropical japonica  | Ivory Coast |
| GP708 | A | temperate japonica | South Korea |
| GP709 | A | temperate japonica | South Korea |
| GP712 | A | tropical japonica  | Malaysia    |
| GP715 | A | aus                | Bengal      |
| GP718 | A | tropical japonica  | India       |
| GP726 | A | tropical japonica  | Ivory Coast |
| GP729 | A | tropical japonica  | Ivory Coast |
| GP747 | A | temperate japonica | South Korea |
| GP748 | A | temperate japonica | South Korea |
| GP755 | A | temperate japonica | North Korea |
| GP761 | A | tropical japonica  | Indonesia   |
| GP766 | A | temperate japonica | North Korea |
| GP768 | A | temperate japonica | North Korea |
| GP770 | A | temperate japonica | North Korea |
| GP776 | A | temperate japonica | South Korea |
| GP790 | A | temperate japonica | Japan       |
| GP801 | A | temperate japonica | Japan       |
| GP809 | A | temperate japonica | Japan       |
| W0108 | - | Or-II              | India       |
| W0120 | - | Or-II              | India       |
| W0121 | - | Or-I               | India       |
| W0123 | - | Or-I               | India       |
| W0124 | - | Or-I               | India       |
| W0128 | - | Or-I               | India       |
| W0130 | - | Or-I               | India       |
| W0135 | - | Or-III             | India       |
| W0138 | - | Or-III             | India       |
| W0141 | - | Or-III             | India       |
| W0147 | - | Or-I               | India       |
| W0153 | - | Or-III             | India       |
| W0157 | - | Or-II              | India       |
| W0165 | - | Or-II              | Thailand    |
| W0168 | - | Or-I               | Thailand    |
| W0171 | - | Or-II              | Thailand    |
| W0173 | - | Or-I               | Thailand    |
| W0174 | - | Or-II              | Thailand    |
| W0175 | - | Or-II              | Thailand    |
| W0178 | - | Or-I               | Thailand    |

|       |   |        |                  |
|-------|---|--------|------------------|
| W0180 | - | Or-II  | Thailand         |
| W0573 | - | Or-III | Malaya           |
| W0574 | - | Or-I   | Malaya           |
| W0576 | - | Or-II  | Malaya           |
| W0594 | - | Or-II  | Malaya           |
| W0596 | - | Or-II  | Malaya           |
| W0600 | - | Or-II  | Malaya           |
| W0605 | - | Or-I   | Malaya           |
| W0623 | - | Or-III | Burma            |
| W0625 | - | Or-III | Burma            |
| W0627 | - | Or-I   | Burma            |
| W0628 | - | Or-II  | Burma            |
| W0629 | - | Or-III | Burma            |
| W0630 | - | Or-I   | Burma            |
| W0631 | - | Or-I   | Burma            |
| W0632 | - | Or-I   | Burma            |
| W0633 | - | Or-I   | Burma            |
| W0634 | - | Or-II  | Burma            |
| W0635 | - | Or-II  | Burma            |
| W0637 | - | Or-III | Burma            |
| W0639 | - | Or-I   | Burma            |
| W1082 | - | Or-I   | India            |
| W1084 | - | Or-I   | India            |
| W1087 | - | Or-II  | India            |
| W1090 | - | Or-I   | India            |
| W1092 | - | Or-I   | India            |
| W1093 | - | Or-II  | India            |
| W1096 | - | Or-II  | India            |
| W1102 | - | Or-III | India            |
| W1105 | - | Or-I   | India            |
| W1107 | - | Or-I   | India            |
| W1114 | - | Or-III | India            |
| W1121 | - | Or-I   | India            |
| W1126 | - | Or-II  | India            |
| W1161 | - | Or-III | Sri Lanka        |
| W1230 | - | Or-I   | Dutch New Guinea |
| W1294 | - | Or-III | Philippines      |
| W1295 | - | Or-I   | Cambodia         |
| W1532 | - | Or-I   | India            |
| W1533 | - | Or-I   | India            |
| W1534 | - | Or-III | India            |
| W1536 | - | Or-III | Sri Lanka        |
| W1542 | - | Or-III | Malaya           |
| W1552 | - | Or-II  | Thailand         |
| W1554 | - | Or-II  | Thailand         |
| W1555 | - | Or-II  | Thailand         |
| W1559 | - | Or-I   | Thailand         |
| W1619 | - | Or-I   | Thailand         |
| W1666 | - | Or-I   | India            |
| W1668 | - | Or-III | India            |
| W1669 | - | Or-III | India            |
| W1676 | - | Or-I   | India            |
| W1683 | - | Or-II  | India            |
| W1685 | - | Or-I   | India            |
| W1687 | - | Or-II  | India            |
| W1690 | - | Or-I   | Thailand         |

|       |   |        |            |
|-------|---|--------|------------|
| W1696 | - | Or-I   | Thailand   |
| W1715 | - | Or-II  | China      |
| W1716 | - | Or-III | China      |
| W1719 | - | Or-I   | China      |
| W1721 | - | Or-I   | China      |
| W1723 | - | Or-I   | China      |
| W1725 | - | Or-III | Thailand   |
| W1736 | - | Or-II  | India      |
| W1737 | - | Or-I   | India      |
| W1741 | - | Or-I   | India      |
| W1751 | - | Or-I   | India      |
| W1756 | - | Or-I   | India      |
| W1762 | - | Or-I   | India      |
| W1783 | - | Or-III | India      |
| W1784 | - | Or-III | India      |
| W1803 | - | Or-III | Sri Lanka  |
| W1813 | - | Or-III | Sri Lanka  |
| W1832 | - | Or-I   | Thailand   |
| W1844 | - | Or-III | China      |
| W1873 | - | Or-II  | Thailand   |
| W1879 | - | Or-I   | Thailand   |
| W1881 | - | Or-I   | Thailand   |
| W1884 | - | Or-II  | Thailand   |
| W1912 | - | Or-I   | Thailand   |
| W1921 | - | Or-I   | Thailand   |
| W1943 | - | Or-III | China      |
| W1957 | - | Or-III | China      |
| W1971 | - | Or-II  | Indonesia  |
| W1979 | - | Or-II  | Indonesia  |
| W1981 | - | Or-II  | Indonesia  |
| W1993 | - | Or-III | India      |
| W1995 | - | Or-III | India      |
| W2008 | - | Or-III | India      |
| W2012 | - | Or-III | India      |
| W2017 | - | Or-II  | Indonesia  |
| W2057 | - | Or-III | Bangladesh |
| W2078 | - | Or-III | Australia  |
| W2099 | - | Or-III | Australia  |
| W2108 | - | Or-III | Australia  |
| W2193 | - | Or-I   | India      |
| W2264 | - | Or-II  | Vietnam    |
| W2267 | - | Or-III | Laos       |
| W2276 | - | Or-II  | Thailand   |
| W2282 | - | Or-II  | Thailand   |
| W2284 | - | Or-II  | Thailand   |
| W2301 | - | Or-I   | Laos       |
| W2303 | - | Or-I   | Laos       |
| W2308 | - | Or-II  | Laos       |
| W2310 | - | Or-II  | Laos       |
| W2320 | - | Or-II  | Vietnam    |
| W2327 | - | Or-II  | Vietnam    |
| W3000 | - | Or-III | China      |
| W3001 | - | Or-III | China      |
| W3003 | - | Or-II  | China      |
| W3004 | - | Or-III | China      |
| W3005 | - | Or-III | China      |

|       |   |                    |       |
|-------|---|--------------------|-------|
| W3006 | - | Or-III             | China |
| W3008 | - | Or-III             | China |
| W3011 | - | Or-III             | China |
| W3020 | - | Or-III             | China |
| W3022 | - | Or-III             | China |
| W3024 | - | Or-III             | China |
| W3025 | - | Or-III             | China |
| W3026 | - | Or-III             | China |
| W3028 | - | Or-III             | China |
| W3029 | - | Or-III             | China |
| W3036 | - | Or-III             | China |
| W3037 | - | Or-III             | China |
| W3038 | - | Or-III             | China |
| W3041 | - | Or-III             | China |
| W3042 | - | Or-III             | China |
| W3043 | - | Or-III             | China |
| W3047 | - | Or-III             | China |
| W3048 | - | Or-III             | China |
| W3056 | - | Or-III             | China |
| W3057 | - | Or-III             | China |
| W3058 | - | Or-III             | China |
| W3061 | - | Or-III             | China |
| W3063 | - | Or-III             | China |
| W3067 | - | Or-II              | China |
| W3072 | - | Or-II              | China |
| W3074 | - | Or-III             | China |
| W3075 | - | Or-III             | China |
| W3076 | - | Or-III             | China |
| W3081 | - | Or-III             | China |
| W3083 | - | Or-III             | China |
| W3086 | - | Or-III             | China |
| W3087 | - | Or-III             | China |
| W3088 | - | Or-III             | China |
| W3090 | - | Or-II              | China |
| W3091 | - | Or-II              | China |
| W3093 | - | Or-III             | China |
| W3095 | - | Or-III             | China |
| W3097 | - | Or-II              | China |
| W3098 | - | Or-II              | China |
| HP1   | - | temperate japonica | China |
| HP3   | - | temperate japonica | China |
| HP4   | - | temperate japonica | China |
| HP5   | - | temperate japonica | China |
| HP7   | - | temperate japonica | China |
| HP8   | - | temperate japonica | China |
| HP11  | - | temperate japonica | China |
| HP12  | - | temperate japonica | China |
| HP13  | - | temperate japonica | China |
| HP16  | - | temperate japonica | China |
| HP18  | - | temperate japonica | China |
| HP21  | - | temperate japonica | China |
| HP24  | - | temperate japonica | China |
| HP26  | - | indica             | China |
| HP27  | - | intermedia         | China |
| HP28  | - | intermedia         | China |
| HP30  | - | temperate japonica | China |

|       |   |                    |       |
|-------|---|--------------------|-------|
| HP32  | - | temperate japonica | China |
| HP33  | - | temperate japonica | China |
| HP34  | - | temperate japonica | China |
| HP38  | - | temperate japonica | China |
| HP40  | - | temperate japonica | China |
| HP41  | - | intermedia         | China |
| HP48  | - | temperate japonica | China |
| HP51  | - | temperate japonica | China |
| HP52  | - | temperate japonica | China |
| HP54  | - | temperate japonica | China |
| HP56  | - | temperate japonica | China |
| HP58  | - | temperate japonica | China |
| HP61  | - | indica             | China |
| HP62  | - | temperate japonica | China |
| HP63  | - | intermedia         | China |
| HP64  | - | temperate japonica | China |
| HP65  | - | temperate japonica | China |
| HP66  | - | temperate japonica | China |
| HP67  | - | temperate japonica | China |
| HP69  | - | indica             | China |
| HP70  | - | temperate japonica | China |
| HP74  | - | temperate japonica | China |
| HP75  | - | indica             | China |
| HP76  | - | indica             | China |
| HP77  | - | temperate japonica | China |
| HP79  | - | temperate japonica | China |
| HP82  | - | temperate japonica | China |
| HP83  | - | temperate japonica | China |
| HP87  | - | temperate japonica | China |
| HP89  | - | temperate japonica | China |
| HP90  | - | temperate japonica | China |
| HP92  | - | temperate japonica | China |
| HP94  | - | temperate japonica | China |
| HP96  | - | temperate japonica | China |
| HP98  | - | temperate japonica | China |
| HP100 | - | temperate japonica | China |
| HP101 | - | temperate japonica | China |
| HP102 | - | temperate japonica | China |
| HP103 | - | temperate japonica | China |
| HP104 | - | temperate japonica | China |
| HP107 | - | temperate japonica | China |
| HP111 | - | temperate japonica | China |
| HP117 | - | temperate japonica | China |
| HP121 | - | indica             | China |
| HP122 | - | temperate japonica | China |
| HP123 | - | temperate japonica | China |
| HP124 | - | temperate japonica | China |
| HP125 | - | temperate japonica | China |
| HP131 | - | temperate japonica | China |
| HP134 | - | temperate japonica | China |
| HP136 | - | temperate japonica | China |
| HP138 | - | temperate japonica | China |
| HP139 | - | temperate japonica | China |
| HP140 | - | temperate japonica | China |
| HP141 | - | temperate japonica | China |
| HP146 | - | temperate japonica | China |



|       |   |                    |       |
|-------|---|--------------------|-------|
| HP147 | - | temperate japonica | China |
| HP149 | - | indica             | China |
| HP150 | - | temperate japonica | China |
| HP152 | - | temperate japonica | China |
| HP153 | - | temperate japonica | China |
| HP154 | - | temperate japonica | China |
| HP155 | - | temperate japonica | China |
| HP157 | - | temperate japonica | China |
| HP158 | - | temperate japonica | China |
| HP161 | - | temperate japonica | China |
| HP162 | - | temperate japonica | China |
| HP164 | - | indica             | China |
| HP167 | - | indica             | China |
| HP168 | - | temperate japonica | China |
| HP170 | - | temperate japonica | China |
| HP171 | - | temperate japonica | China |
| HP177 | - | indica             | China |
| HP181 | - | indica             | China |
| HP183 | - | indica             | China |
| HP185 | - | indica             | China |
| HP186 | - | indica             | China |
| HP189 | - | indica             | China |
| HP191 | - | indica             | China |
| HP194 | - | indica             | China |
| HP196 | - | indica             | China |
| HP197 | - | indica             | China |
| HP200 | - | indica             | China |
| HP201 | - | indica             | China |
| HP203 | - | indica             | China |
| HP208 | - | indica             | China |
| HP209 | - | indica             | China |
| HP210 | - | indica             | China |
| HP212 | - | indica             | China |
| HP213 | - | indica             | China |
| HP215 | - | indica             | China |
| HP217 | - | indica             | China |
| HP222 | - | indica             | China |
| HP224 | - | indica             | China |
| HP225 | - | indica             | China |
| HP226 | - | indica             | China |
| HP228 | - | indica             | China |
| HP229 | - | indica             | China |
| HP230 | - | indica             | China |
| HP233 | - | indica             | China |
| HP234 | - | indica             | China |
| HP235 | - | indica             | China |
| HP236 | - | indica             | China |
| HP237 | - | indica             | China |
| HP238 | - | indica             | China |
| HP239 | - | indica             | China |
| HP240 | - | indica             | China |
| HP242 | - | indica             | China |
| HP243 | - | indica             | China |
| HP244 | - | indica             | China |
| HP245 | - | indica             | China |
| HP255 | - | indica             | China |

|       |   |                    |       |
|-------|---|--------------------|-------|
| HP259 | - | indica             | China |
| HP260 | - | indica             | China |
| HP261 | - | indica             | China |
| HP263 | - | indica             | China |
| HP264 | - | indica             | China |
| HP267 | - | indica             | China |
| HP268 | - | indica             | China |
| HP269 | - | indica             | China |
| HP271 | - | temperate japonica | China |
| HP272 | - | temperate japonica | China |
| HP279 | - | indica             | China |
| HP284 | - | temperate japonica | China |
| HP287 | - | indica             | China |
| HP288 | - | indica             | China |
| HP289 | - | indica             | China |
| HP292 | - | indica             | China |
| HP294 | - | intermedia         | China |
| HP295 | - | indica             | China |
| HP296 | - | indica             | China |
| HP297 | - | indica             | China |
| HP299 | - | indica             | China |
| HP300 | - | indica             | China |
| HP301 | - | indica             | China |
| HP306 | - | indica             | China |
| HP308 | - | temperate japonica | China |
| HP309 | - | temperate japonica | China |
| HP310 | - | indica             | China |
| HP311 | - | indica             | China |
| HP312 | - | indica             | China |
| HP314 | - | temperate japonica | China |
| HP315 | - | temperate japonica | China |
| HP318 | - | indica             | China |
| HP319 | - | indica             | China |
| HP321 | - | indica             | China |
| HP322 | - | indica             | China |
| HP323 | - | indica             | China |
| HP326 | - | indica             | China |
| HP327 | - | indica             | China |
| HP330 | - | temperate japonica | China |
| HP332 | - | indica             | China |
| HP333 | - | indica             | China |
| HP335 | - | indica             | China |
| HP336 | - | indica             | China |
| HP337 | - | indica             | China |
| HP339 | - | indica             | China |
| HP340 | - | indica             | China |
| HP341 | - | indica             | China |
| HP347 | - | indica             | China |
| HP349 | - | indica             | China |
| HP360 | - | indica             | China |
| HP362 | - | indica             | China |
| HP365 | - | indica             | China |
| HP368 | - | indica             | China |
| HP370 | - | temperate japonica | China |
| HP372 | - | temperate japonica | China |
| HP374 | - | indica             | China |

|       |   |                    |       |
|-------|---|--------------------|-------|
| HP376 | - | temperate japonica | China |
| HP379 | - | indica             | China |
| HP381 | - | intermedia         | China |
| HP382 | - | temperate japonica | China |
| HP383 | - | indica             | China |
| HP385 | - | temperate japonica | China |
| HP387 | - | indica             | China |
| HP389 | - | temperate japonica | China |
| HP390 | - | temperate japonica | China |
| HP391 | - | temperate japonica | China |
| HP395 | - | indica             | China |
| HP396 | - | indica             | China |
| HP398 | - | temperate japonica | China |
| HP400 | - | indica             | China |
| HP401 | - | temperate japonica | China |
| HP402 | - | temperate japonica | China |
| HP403 | - | temperate japonica | China |
| HP407 | - | indica             | China |
| HP408 | - | indica             | China |
| HP409 | - | indica             | China |
| HP411 | - | indica             | China |
| HP414 | - | indica             | China |
| HP415 | - | indica             | China |
| HP416 | - | indica             | China |
| HP417 | - | indica             | China |
| HP418 | - | indica             | China |
| HP420 | - | indica             | China |
| HP423 | - | indica             | China |
| HP424 | - | indica             | China |
| HP425 | - | temperate japonica | China |
| HP426 | - | temperate japonica | China |
| HP430 | - | indica             | China |
| HP432 | - | indica             | China |
| HP435 | - | indica             | China |
| HP437 | - | indica             | China |
| HP438 | - | indica             | China |
| HP439 | - | temperate japonica | China |
| HP443 | - | indica             | China |
| HP445 | - | indica             | China |
| HP446 | - | indica             | China |
| HP448 | - | indica             | China |
| HP449 | - | indica             | China |
| HP450 | - | indica             | China |
| HP464 | - | indica             | China |
| HP466 | - | temperate japonica | China |
| HP467 | - | indica             | China |
| HP471 | - | indica             | China |
| HP472 | - | indica             | China |
| HP473 | - | indica             | China |
| HP475 | - | indica             | China |
| HP477 | - | indica             | China |
| HP484 | - | indica             | China |
| HP486 | - | indica             | China |
| HP488 | - | indica             | China |
| HP489 | - | indica             | China |
| HP490 | - | indica             | China |

|       |   |                    |       |
|-------|---|--------------------|-------|
| HP491 | - | indica             | China |
| HP497 | - | indica             | China |
| HP499 | - | indica             | China |
| HP501 | - | indica             | China |
| HP503 | - | indica             | China |
| HP504 | - | indica             | China |
| HP511 | - | temperate japonica | China |
| HP512 | - | temperate japonica | China |
| HP516 | - | indica             | China |
| HP522 | - | indica             | China |
| HP523 | - | indica             | China |
| HP524 | - | indica             | China |
| HP525 | - | temperate japonica | China |
| HP530 | - | indica             | China |
| HP532 | - | temperate japonica | China |
| HP533 | - | indica             | China |
| HP537 | - | indica             | China |
| HP539 | - | indica             | China |
| HP540 | - | indica             | China |
| HP543 | - | indica             | China |
| HP549 | - | indica             | China |
| HP550 | - | indica             | China |
| HP551 | - | indica             | China |
| HP552 | - | indica             | China |
| HP554 | - | temperate japonica | China |
| HP558 | - | indica             | China |
| HP559 | - | indica             | China |
| HP560 | - | indica             | China |
| HP562 | - | indica             | China |
| HP563 | - | indica             | China |
| HP564 | - | temperate japonica | China |
| HP566 | - | indica             | China |
| HP567 | - | indica             | China |
| HP569 | - | indica             | China |
| HP570 | - | indica             | China |
| HP573 | - | indica             | China |
| HP574 | - | temperate japonica | China |
| HP575 | - | indica             | China |
| HP576 | - | indica             | China |
| HP577 | - | indica             | China |
| HP578 | - | indica             | China |
| HP579 | - | indica             | China |
| HP580 | - | indica             | China |
| HP581 | - | indica             | China |
| HP584 | - | indica             | China |
| HP585 | - | temperate japonica | China |
| HP592 | - | indica             | China |
| HP593 | - | indica             | China |
| HP594 | - | intermedia         | China |
| HP595 | - | indica             | China |
| HP598 | - | indica             | China |
| HP601 | - | indica             | China |
| HP602 | - | temperate japonica | China |
| HP606 | - | indica             | China |
| HP609 | - | indica             | China |
| HP610 | - | indica             | China |

|       |   |                    |             |
|-------|---|--------------------|-------------|
| HP611 | - | indica             | China       |
| HP612 | - | indica             | China       |
| HP990 | - | temperate japonica | China       |
| HP991 | - | indica             | China       |
| HP992 | - | temperate japonica | China       |
| HP994 | - | indica             | China       |
| HP997 | - | temperate japonica | Japan       |
| HP998 | - | indica             | China       |
| GP2   | - | intermedia         | Bengal      |
| GP3   | - | indica             | Brazil      |
| GP4   | - | indica             | Philippine  |
| GP5   | - | tropical japonica  | Madagascar  |
| GP6   | - | indica             | Thailand    |
| GP7   | - | tropical japonica  | Ivory Coast |
| GP8   | - | aus                | Bengal      |
| GP9   | - | indica             | Philippine  |
| GP10  | - | indica             | Philippine  |
| GP12  | - | indica             | IRRI        |
| GP13  | - | indica             | Philippine  |
| GP14  | - | indica             | IRRI        |
| GP15  | - | indica             | IRRI        |
| GP16  | - | indica             | IRRI        |
| GP17  | - | indica             | IRRI        |
| GP19  | - | indica             | IRRI        |
| GP20  | - | indica             | IRRI        |
| GP21  | - | indica             | IRRI        |
| GP22  | - | indica             | IRRI        |
| GP23  | - | indica             | IRRI        |
| GP25  | - | indica             | IRRI        |
| GP26  | - | intermedia         | IRRI        |
| GP28  | - | indica             | IRRI        |
| GP29  | - | indica             | IRRI        |
| GP30  | - | indica             | IRRI        |
| GP31  | - | indica             | IRRI        |
| GP32  | - | indica             | Philippine  |
| GP33  | - | indica             | Philippine  |
| GP35  | - | indica             | Philippine  |
| GP37  | - | indica             | Philippine  |
| GP38  | - | aus                | India       |
| GP39  | - | tropical japonica  | Brazil      |
| GP40  | - | indica             | Sri Lanka   |
| GP41  | - | indica             | Vietnam     |
| GP42  | - | indica             | Malaysia    |
| GP45  | - | indica             | India       |
| GP47  | - | aus                | India       |
| GP48  | - | indica             | Cuba        |
| GP49  | - | indica             | Cuba        |
| GP50  | - | indica             | Cuba        |
| GP51  | - | indica             | Cuba        |
| GP52  | - | indica             | Cuba        |
| GP53  | - | indica             | Cuba        |
| GP54  | - | indica             | Cuba        |
| GP56  | - | intermedia         | Uganda      |
| GP57  | - | aus                | Madagascar  |
| GP59  | - | temperate japonica | Philippine  |
| GP60  | - | indica             | India       |

|       |   |                    |            |
|-------|---|--------------------|------------|
| GP61  | - | aus                | India      |
| GP63  | - | aus                | India      |
| GP64  | - | indica             | Burma      |
| GP65  | - | indica             | IRRI       |
| GP66  | - | indica             | Vietnam    |
| GP67  | - | aus                | India      |
| GP69  | - | indica             | IRRI       |
| GP70  | - | indica             | IRRI       |
| GP71  | - | indica             | IRRI       |
| GP72  | - | indica             | IRRI       |
| GP73  | - | indica             | IRRI       |
| GP75  | - | aus                | Philippine |
| GP76  | - | indica             | Madagascar |
| GP77  | - | tropical japonica  | IRRI       |
| GP78  | - | indica             | IRRI       |
| GP79  | - | indica             | IRRI       |
| GP81  | - | indica             | IRRI       |
| GP82  | - | indica             | IRRI       |
| GP83  | - | indica             | India      |
| GP85  | - | indica             | Thailand   |
| GP87  | - | indica             | India      |
| GP88  | - | temperate japonica | Egypt      |
| GP89  | - | aus                | Bengal     |
| GP90  | - | indica             | IRRI       |
| GP91  | - | indica             | IRRI       |
| GP92  | - | indica             | IRRI       |
| GP93  | - | indica             | IRRI       |
| GP94  | - | indica             | IRRI       |
| GP95  | - | indica             | IRRI       |
| GP96  | - | indica             | IRRI       |
| GP97  | - | indica             | IRRI       |
| GP98  | - | indica             | IRRI       |
| GP99  | - | indica             | IRRI       |
| GP100 | - | indica             | IRRI       |
| GP101 | - | indica             | IRRI       |
| GP102 | - | indica             | IRRI       |
| GP103 | - | indica             | Sri Lanka  |
| GP104 | - | aus                | Bengal     |
| GP105 | - | indica             | IRRI       |
| GP106 | - | indica             | IRRI       |
| GP107 | - | indica             | Uganda     |
| GP108 | - | indica             | Philippine |
| GP109 | - | aus                | Madagascar |
| GP110 | - | aus                | Philippine |
| GP111 | - | indica             | IRRI       |
| GP112 | - | tropical japonica  | Gambian    |
| GP113 | - | indica             | IRRI       |
| GP114 | - | indica             | Philippine |
| GP115 | - | indica             | US         |
| GP116 | - | indica             | IRRI       |
| GP117 | - | tropical japonica  | US         |
| GP119 | - | indica             | IRRI       |
| GP120 | - | indica             | Philippine |
| GP121 | - | indica             | IRRI       |
| GP122 | - | indica             | Sri Lanka  |
| GP123 | - | indica             | IRRI       |

|       |   |                    |                 |
|-------|---|--------------------|-----------------|
| GP124 | - | aus                | Bengal          |
| GP125 | - | indica             | Ivory Coast     |
| GP126 | - | temperate japonica | Uganda          |
| GP127 | - | indica             | IRRI            |
| GP128 | - | indica             | India           |
| GP129 | - | indica             | IRRI            |
| GP130 | - | indica             | IRRI            |
| GP131 | - | indica             | Sri Lanka       |
| GP132 | - | indica             | IRRI            |
| GP133 | - | indica             | IRRI            |
| GP134 | - | indica             | North Korea     |
| GP135 | - | indica             | North Korea     |
| GP136 | - | indica             | IRRI            |
| GP137 | - | indica             | North Korea     |
| GP139 | - | indica             | IRRI            |
| GP140 | - | indica             | IRRI            |
| GP141 | - | intermedia         | Nepal           |
| GP142 | - | indica             | India           |
| GP144 | - | indica             | North Korea     |
| GP296 | - | aromatic           | Pakistan        |
| GP498 | - | temperate japonica | Japan           |
| GP499 | - | temperate japonica | Japan           |
| GP500 | - | temperate japonica | Japan           |
| GP501 | - | temperate japonica | Japan           |
| GP503 | - | tropical japonica  | Italy           |
| GP504 | - | temperate japonica | Japan           |
| GP505 | - | temperate japonica | Japan           |
| GP506 | - | temperate japonica | Japan           |
| GP508 | - | temperate japonica | Japan           |
| GP509 | - | temperate japonica | Japan           |
| GP510 | - | temperate japonica | Portugal        |
| GP511 | - | temperate japonica | Russia          |
| GP514 | - | tropical japonica  | Philippine      |
| GP515 | - | tropical japonica  | Philippine      |
| GP516 | - | tropical japonica  | Philippine      |
| GP517 | - | tropical japonica  | Philippine      |
| GP518 | - | tropical japonica  | Philippine      |
| GP519 | - | temperate japonica | Laos            |
| GP520 | - | temperate japonica | Laos            |
| GP521 | - | tropical japonica  | Indonesia       |
| GP523 | - | temperate japonica | Solomon Islands |
| GP524 | - | intermedia         | Philippine      |
| GP525 | - | temperate japonica | Thailand        |
| GP526 | - | indica             | Thailand        |
| GP527 | - | temperate japonica | Laos            |
| GP528 | - | temperate japonica | Laos            |
| GP529 | - | temperate japonica | Laos            |
| GP531 | - | aus                | Bengal          |
| GP533 | - | aus                | Bengal          |
| GP534 | - | tropical japonica  | Malaysia        |
| GP535 | - | tropical japonica  | Philippine      |
| GP536 | - | tropical japonica  | Philippine      |
| GP538 | - | aus                | India           |
| GP539 | - | aus                | India           |
| GP540 | - | aus                | Pakistan        |
| GP541 | - | tropical japonica  | Philippine      |

|       |   |                    |             |
|-------|---|--------------------|-------------|
| GP543 | - | intermedia         | US          |
| GP544 | - | tropical japonica  | US          |
| GP545 | - | temperate japonica | Egypt       |
| GP546 | - | temperate japonica | Japan       |
| GP547 | - | temperate japonica | Japan       |
| GP548 | - | temperate japonica | Japan       |
| GP549 | - | temperate japonica | Japan       |
| GP550 | - | temperate japonica | Japan       |
| GP551 | - | temperate japonica | Japan       |
| GP552 | - | temperate japonica | Japan       |
| GP553 | - | indica             | Japan       |
| GP554 | - | temperate japonica | Japan       |
| GP555 | - | temperate japonica | Japan       |
| GP556 | - | temperate japonica | Japan       |
| GP557 | - | temperate japonica | Japan       |
| GP558 | - | temperate japonica | Japan       |
| GP559 | - | temperate japonica | Japan       |
| GP560 | - | temperate japonica | North Korea |
| GP562 | - | intermedia         | Albania     |
| GP563 | - | temperate japonica | Albania     |
| GP564 | - | temperate japonica | Russia      |
| GP565 | - | temperate japonica | France      |
| GP566 | - | temperate japonica | Argentina   |
| GP567 | - | temperate japonica | IRRI        |
| GP569 | - | temperate japonica | Philippine  |
| GP570 | - | temperate japonica | Philippine  |
| GP571 | - | temperate japonica | Japan       |
| GP572 | - | indica             | Ivory Coast |
| GP573 | - | indica             | Brazil      |
| GP576 | - | aus                | Pakistan    |
| GP577 | - | intermedia         | Brazil      |
| GP578 | - | tropical japonica  | Philippine  |
| GP579 | - | temperate japonica | Philippine  |
| GP580 | - | temperate japonica | Laos        |
| GP581 | - | temperate japonica | Bulgaria    |
| GP582 | - | temperate japonica | Laos        |
| GP583 | - | temperate japonica | Thailand    |
| GP585 | - | temperate japonica | North Korea |
| GP589 | - | indica             | Egypt       |
| GP590 | - | temperate japonica | India       |
| GP592 | - | temperate japonica | Japan       |
| GP593 | - | indica             | North Korea |
| GP594 | - | temperate japonica | Argentina   |
| GP595 | - | temperate japonica | Japan       |
| GP598 | - | temperate japonica | South Korea |
| GP601 | - | temperate japonica | North Korea |
| GP602 | - | temperate japonica | North Korea |
| GP606 | - | temperate japonica | South Korea |
| GP607 | - | temperate japonica | Japan       |
| GP608 | - | temperate japonica | Japan       |
| GP609 | - | temperate japonica | Japan       |
| GP612 | - | temperate japonica | US          |
| GP613 | - | intermedia         | US          |
| GP615 | - | intermedia         | US          |
| GP616 | - | intermedia         | US          |
| GP617 | - | intermedia         | US          |



|       |   |                    |             |
|-------|---|--------------------|-------------|
| GP619 | - | temperate japonica | Japan       |
| GP621 | - | temperate japonica | Japan       |
| GP622 | - | indica             | IRRI        |
| GP623 | - | temperate japonica | Japan       |
| GP630 | - | temperate japonica | Japan       |
| GP631 | - | indica             | Japan       |
| GP633 | - | indica             | Philippine  |
| GP636 | - | temperate japonica | North Korea |
| GP637 | - | intermedia         | North Korea |
| GP638 | - | temperate japonica | North Korea |
| GP640 | - | tropical japonica  | US          |
| GP641 | - | tropical japonica  | US          |
| GP642 | - | tropical japonica  | US          |
| GP643 | - | tropical japonica  | Ivory Coast |
| GP644 | - | tropical japonica  | Ivory Coast |
| GP645 | - | intermedia         | Sri Lanka   |
| GP648 | - | temperate japonica | Japan       |
| GP649 | - | temperate japonica | Japan       |
| GP650 | - | temperate japonica | Japan       |
| GP651 | - | temperate japonica | North Korea |
| GP653 | - | temperate japonica | Japan       |
| GP655 | - | temperate japonica | Japan       |
| GP657 | - | temperate japonica | Vietnam     |
| GP661 | - | temperate japonica | Italy       |
| GP663 | - | temperate japonica | Japan       |
| GP664 | - | temperate japonica | Japan       |
| GP665 | - | temperate japonica | Japan       |
| GP668 | - | temperate japonica | Japan       |
| GP669 | - | temperate japonica | Japan       |
| GP670 | - | temperate japonica | Japan       |
| GP673 | - | temperate japonica | Japan       |
| GP675 | - | temperate japonica | Japan       |
| GP676 | - | indica             | Japan       |
| GP677 | - | temperate japonica | North Korea |
| GP678 | - | temperate japonica | South Korea |
| GP679 | - | tropical japonica  | Indonesia   |
| GP681 | - | intermedia         | Cuba        |
| GP682 | - | temperate japonica | Indonesia   |
| GP684 | - | tropical japonica  | Italy       |
| GP685 | - | temperate japonica | Italy       |
| GP687 | - | intermedia         | Indonesia   |
| GP690 | - | tropical japonica  | Indonesia   |
| GP691 | - | temperate japonica | Hungary     |
| GP692 | - | temperate japonica | Hungary     |
| GP696 | - | tropical japonica  | Brazil      |
| GP698 | - | tropical japonica  | Ivory Coast |
| GP703 | - | temperate japonica | South Korea |
| GP707 | - | temperate japonica | South Korea |
| GP710 | - | temperate japonica | South Korea |
| GP711 | - | tropical japonica  | Indonesia   |
| GP713 | - | aus                | Bengal      |
| GP714 | - | tropical japonica  | Indonesia   |
| GP717 | - | temperate japonica | Brazil      |
| GP719 | - | intermedia         | US          |
| GP720 | - | intermedia         | Brazil      |
| GP721 | - | tropical japonica  | Ivory Coast |

|       |   |                    |             |
|-------|---|--------------------|-------------|
| GP722 | - | indica             | Ivory Coast |
| GP723 | - | tropical japonica  | Ivory Coast |
| GP724 | - | tropical japonica  | Ivory Coast |
| GP725 | - | tropical japonica  | Ivory Coast |
| GP727 | - | tropical japonica  | Ivory Coast |
| GP728 | - | tropical japonica  | Ivory Coast |
| GP730 | - | tropical japonica  | Nigeria     |
| GP731 | - | tropical japonica  | Nigeria     |
| GP732 | - | tropical japonica  | Nigeria     |
| GP733 | - | tropical japonica  | Nigeria     |
| GP734 | - | tropical japonica  | Nigeria     |
| GP735 | - | tropical japonica  | Nigeria     |
| GP736 | - | intermedia         | Nigeria     |
| GP737 | - | intermedia         | Nigeria     |
| GP738 | - | temperate japonica | South Korea |
| GP739 | - | temperate japonica | Hungary     |
| GP740 | - | temperate japonica | Hungary     |
| GP741 | - | temperate japonica | Japan       |
| GP742 | - | temperate japonica | South Korea |
| GP743 | - | temperate japonica | South Korea |
| GP744 | - | tropical japonica  | Brazil      |
| GP745 | - | tropical japonica  | Brazil      |
| GP746 | - | temperate japonica | South Korea |
| GP749 | - | temperate japonica | South Korea |
| GP750 | - | temperate japonica | Indonesia   |
| GP751 | - | tropical japonica  | Brazil      |
| GP752 | - | intermedia         | IRRI        |
| GP753 | - | tropical japonica  | US          |
| GP754 | - | temperate japonica | North Korea |
| GP756 | - | temperate japonica | North Korea |
| GP758 | - | tropical japonica  | US          |
| GP759 | - | temperate japonica | US          |
| GP760 | - | temperate japonica | Japan       |
| GP762 | - | intermedia         | Indonesia   |
| GP764 | - | aus                | India       |
| GP765 | - | temperate japonica | North Korea |
| GP769 | - | temperate japonica | North Korea |
| GP771 | - | temperate japonica | North Korea |
| GP773 | - | temperate japonica | North Korea |
| GP774 | - | temperate japonica | North Korea |
| GP775 | - | temperate japonica | North Korea |
| GP777 | - | temperate japonica | South Korea |
| GP779 | - | temperate japonica | Japan       |
| GP780 | - | temperate japonica | Japan       |
| GP782 | - | temperate japonica | South Korea |
| GP783 | - | temperate japonica | Japan       |
| GP784 | - | temperate japonica | Japan       |
| GP785 | - | indica             | Japan       |
| GP786 | - | temperate japonica | Japan       |
| GP787 | - | temperate japonica | Japan       |
| GP788 | - | temperate japonica | Japan       |
| GP789 | - | temperate japonica | Japan       |
| GP791 | - | temperate japonica | Japan       |
| GP792 | - | temperate japonica | Japan       |
| GP793 | - | temperate japonica | Japan       |
| GP794 | - | temperate japonica | Japan       |

|       |   |                    |       |
|-------|---|--------------------|-------|
| GP795 | - | temperate japonica | Japan |
| GP796 | - | temperate japonica | Japan |
| GP797 | - | temperate japonica | Japan |
| GP798 | - | temperate japonica | Japan |
| GP799 | - | temperate japonica | Japan |
| GP800 | - | temperate japonica | Japan |
| GP802 | - | temperate japonica | Japan |
| GP803 | - | temperate japonica | Japan |
| GP804 | - | temperate japonica | Japan |
| GP805 | - | temperate japonica | Japan |
| GP806 | - | temperate japonica | Japan |
| GP807 | - | temperate japonica | Japan |
| GP808 | - | temperate japonica | Japan |
| GP810 | - | temperate japonica | Japan |
| GP811 | - | temperate japonica | Japan |
| GP812 | - | temperate japonica | Japan |
| GP813 | - | temperate japonica | Japan |
| GP814 | - | temperate japonica | Japan |
| GP815 | - | indica             | Japan |

**Supplementary Table 5.** Genotypes of 340 rice accessions at the *Hwi1* locus detected by PCR amplification and the *Hwi2* locus identified by genome resequencing.

| Accession ID | Other Name | Species             | Original producing area | Latitude | Longitude | Ecotype                   | <i>Hwi1</i> locus | <i>Hwi2</i> locus |
|--------------|------------|---------------------|-------------------------|----------|-----------|---------------------------|-------------------|-------------------|
| GP10         | IR29       | <i>O. sativa</i>    | Philippine              | NA       | NA        | <i>indica</i>             | 9311-like         | a                 |
| GP104        | DV 110     | <i>O. sativa</i>    | Bengal                  | NA       | NA        | <i>aus</i>                | 9311-like         | a                 |
| GP107        | K 159      | <i>O. sativa</i>    | Uganda                  | NA       | NA        | <i>indica</i>             | 9311-like         | a                 |
| GP109        | Madagascar | <i>O. sativa</i>    | Madagascar              | NA       | NA        | <i>aus</i>                | 9311-like         | a                 |
| GP122        | RG 401-1   | <i>O. sativa</i>    | Sri Lanka               | NA       | NA        | <i>indica</i>             | 9311-like         | a                 |
| GP503        | Arborio    | <i>O. sativa</i>    | Italy                   | NA       | NA        | <i>tropical japonica</i>  | 9311-like         | a                 |
| GP508        | BL1        | <i>O. sativa</i>    | Japan                   | NA       | NA        | <i>temperate japonica</i> | 9311-like         | a                 |
| HP178        | Hongxian   | <i>O. sativa</i>    | China                   | 30.16    | 120.10    | <i>intermedia</i>         | 9311-like         | A                 |
| HP179        | Yanjing    | <i>O. sativa</i>    | China                   | 27.68    | 120.55    | <i>indica</i>             | 9311-like         | A                 |
| W0106        | -          | <i>O. rufipogon</i> | India                   | 20.46    | 85.88     | <i>Or-I</i>               | 9311-like         | A                 |
| W0152        | -          | <i>O. rufipogon</i> | India                   | 22.90    | 88.25     | <i>Or-I</i>               | 9311-like         | A                 |
| W0163        | -          | <i>O. rufipogon</i> | Thailand                | 18.81    | 98.66     | <i>Or-II</i>              | 9311-like         | A                 |
| W0164        | -          | <i>O. rufipogon</i> | Thailand                | 18.81    | 98.66     | <i>Or-II</i>              | 9311-like         | A                 |
| W0176        | -          | <i>O. rufipogon</i> | Thailand                | 18.08    | 103.27    | <i>Or-I</i>               | 9311-like         | A                 |
| W0234        | -          | <i>O. rufipogon</i> | Thailand                | 18.08    | 103.27    | <i>Or-II</i>              | 9311-like         | A                 |
| W0590        | -          | <i>O. rufipogon</i> | Malaya                  | 5.70     | 102.53    | <i>Or-I</i>               | 9311-like         | A                 |
| W0606        | -          | <i>O. rufipogon</i> | Malaya                  | 6.00     | 102.25    | <i>Or-II</i>              | 9311-like         | A                 |
| W0626        | -          | <i>O. rufipogon</i> | Burma                   | 19.77    | 96.11     | <i>Or-I</i>               | 9311-like         | A                 |
| W0635        | -          | <i>O. rufipogon</i> | Burma                   | 19.77    | 96.11     | <i>Or-II</i>              | 9311-like         | a                 |
| W0638        | -          | <i>O. rufipogon</i> | Burma                   | 14.08    | 98.20     | <i>Or-I</i>               | 9311-like         | A                 |
| W1080        | -          | <i>O. rufipogon</i> | India                   | 27.00    | 88.40     | <i>Or-I</i>               | 9311-like         | A                 |
| W1086        | -          | <i>O. rufipogon</i> | India                   | 27.00    | 88.40     | <i>Or-I</i>               | 9311-like         | A                 |
| W1117        | -          | <i>O. rufipogon</i> | India                   | 26.82    | 94.17     | <i>Or-I</i>               | 9311-like         | A                 |
| W1556        | -          | <i>O. rufipogon</i> | Thailand                | 14.54    | 99.99     | <i>Or-II</i>              | 9311-like         | A                 |
| W1675        | -          | <i>O. rufipogon</i> | India                   | 20.29    | 86.01     | <i>Or-I</i>               | 9311-like         | A                 |
| W1677        | -          | <i>O. rufipogon</i> | India                   | 20.29    | 86.01     | <i>Or-I</i>               | 9311-like         | A                 |
| W1698        | -          | <i>O. rufipogon</i> | Thailand                | 14.34    | 100.59    | <i>Or-I</i>               | 9311-like         | A                 |
| W1718        | -          | <i>O. rufipogon</i> | China                   | NA       | NA        | <i>Or-II</i>              | 9311-like         | A                 |
| W1719        | -          | <i>O. rufipogon</i> | China                   | NA       | NA        | <i>Or-I</i>               | 9311-like         | a                 |
| W1724        | -          | <i>O. rufipogon</i> | China                   | NA       | NA        | <i>Or-III</i>             | 9311-like         | A                 |
| W1736        | -          | <i>O. rufipogon</i> | India                   | 26.92    | 75.82     | <i>Or-II</i>              | 9311-like         | a                 |
| W1739        | -          | <i>O. rufipogon</i> | India                   | 26.92    | 75.82     | <i>Or-III</i>             | 9311-like         | A                 |
| W1794        | -          | <i>O. rufipogon</i> | Thailand                | 15.00    | 100.00    | <i>Or-I</i>               | 9311-like         | A                 |
| W1820        | -          | <i>O. rufipogon</i> | Bangladesh              | 23.71    | 90.41     | <i>Or-I</i>               | 9311-like         | A                 |
| W1844        | -          | <i>O. rufipogon</i> | China                   | NA       | NA        | <i>Or-III</i>             | 9311-like         | a                 |
| W1850        | -          | <i>O. rufipogon</i> | Thailand                | 19.56    | 99.70     | <i>Or-II</i>              | 9311-like         | A                 |
| W1852        | -          | <i>O. rufipogon</i> | Thailand                | 20.28    | 100.09    | <i>Or-I</i>               | 9311-like         | A                 |
| W1880        | -          | <i>O. rufipogon</i> | Thailand                | 17.03    | 102.91    | <i>Or-II</i>              | 9311-like         | A                 |
| W1914        | -          | <i>O. rufipogon</i> | Thailand                | 14.95    | 103.75    | <i>Or-I</i>               | 9311-like         | A                 |
| W1928        | -          | <i>O. rufipogon</i> | Thailand                | 15.29    | 100.18    | <i>Or-I</i>               | 9311-like         | A                 |
| W1935        | -          | <i>O. rufipogon</i> | Thailand                | 6.89     | 100.53    | <i>Or-I</i>               | 9311-like         | A                 |
| W1958        | -          | <i>O. rufipogon</i> | China                   | NA       | NA        | <i>Or-III</i>             | 9311-like         | A                 |
| W1975        | -          | <i>O. rufipogon</i> | Indonesia               | -2.99    | 104.76    | <i>Or-II</i>              | 9311-like         | A                 |
| W2053        | -          | <i>O. rufipogon</i> | Bangladesh              | 23.71    | 90.41     | <i>Or-I</i>               | 9311-like         | A                 |
| W2063        | -          | <i>O. rufipogon</i> | Bangladesh              | 22.82    | 89.55     | <i>Or-I</i>               | 9311-like         | A                 |
| W2310        | -          | <i>O. rufipogon</i> | Laos                    | 17.51    | 102.36    | <i>Or-II</i>              | 9311-like         | a                 |
| W2316        | -          | <i>O. rufipogon</i> | Vietnam                 | 10.39    | 107.02    | <i>Or-I</i>               | 9311-like         | A                 |
| W2318        | -          | <i>O. rufipogon</i> | Vietnam                 | 10.24    | 106.06    | <i>Or-II</i>              | 9311-like         | A                 |
| W2319        | -          | <i>O. rufipogon</i> | Vietnam                 | 10.33    | 106.25    | <i>Or-I</i>               | 9311-like         | A                 |

|       |                     |                     |                       |       |        |                          |           |   |
|-------|---------------------|---------------------|-----------------------|-------|--------|--------------------------|-----------|---|
| W2320 | -                   | <i>O. rufipogon</i> | Vietnam               | 10.42 | 105.36 | <i>Or-II</i>             | 9311-like | a |
| W2331 | -                   | <i>O. rufipogon</i> | Vietnam               | 21.03 | 105.85 | <i>Or-I</i>              | 9311-like | A |
| W3009 | -                   | <i>O. rufipogon</i> | China                 | 22.89 | 112.85 | <i>Or-III</i>            | 9311-like | A |
| W3021 | -                   | <i>O. rufipogon</i> | China                 | 23.87 | 113.53 | <i>Or-III</i>            | 9311-like | A |
| W3024 | -                   | <i>O. rufipogon</i> | China                 | 23.87 | 113.53 | <i>Or-III</i>            | 9311-like | a |
| W3060 | -                   | <i>O. rufipogon</i> | China                 | 18.75 | 109.17 | <i>Or-III</i>            | 9311-like | A |
| W3068 | -                   | <i>O. rufipogon</i> | China                 | 18.65 | 109.80 | <i>Or-II</i>             | 9311-like | A |
| W3089 | -                   | <i>O. rufipogon</i> | China                 | 22.10 | 100.79 | <i>Or-II</i>             | 9311-like | A |
| GP143 | C 1252-9            | <i>O. sativa</i>    | Philippine            | NA    | NA     | <i>indica</i>            | 9311-like | T |
| GP18  | IR 2061-628-1-6-4-3 | <i>O. sativa</i>    | IRRI                  | NA    | NA     | <i>indica</i>            | 9311-like | T |
| GP587 | Rizhongyouhao-3     | <i>O. sativa</i>    | Japan                 | NA    | NA     | <i>indica</i>            | 9311-like | T |
| GP639 | Suweon 320          | <i>O. sativa</i>    | North Korea           | NA    | NA     | <i>indica</i>            | 9311-like | T |
| GP772 | Xiangnan-1          | <i>O. sativa</i>    | North Korea           | NA    | NA     | <i>indica</i>            | 9311-like | T |
| HP180 | Yizhuai             | <i>O. sativa</i>    | China                 | 27.08 | 120.08 | <i>indica</i>            | 9311-like | T |
| HP232 | Changweizhan        | <i>O. sativa</i>    | China                 | 27.22 | 115.14 | <i>indica</i>            | 9311-like | T |
| HP253 | Yelicang            | <i>O. sativa</i>    | China                 | 33.55 | 109.91 | <i>indica</i>            | 9311-like | T |
| W1839 | -                   | <i>O. rufipogon</i> | China                 | NA    | NA     | <i>Or-I</i>              | 9311-like | T |
| GP718 | ARC 10521           | <i>O. sativa</i>    | India                 | NA    | NA     | <i>tropical japonica</i> | HN-like   | A |
| W0101 | -                   | <i>O. rufipogon</i> | India                 | 20.48 | 85.85  | <i>Or-I</i>              | HN-like   | A |
| W0102 | -                   | <i>O. rufipogon</i> | India                 | 20.48 | 85.85  | <i>Or-I</i>              | HN-like   | A |
| W0120 | -                   | <i>O. rufipogon</i> | India                 | 20.46 | 85.88  | <i>Or-II</i>             | HN-like   | a |
| W0128 | -                   | <i>O. rufipogon</i> | India                 | 21.00 | 85.10  | <i>Or-I</i>              | HN-like   | a |
| W0132 | -                   | <i>O. rufipogon</i> | India                 | 17.05 | 82.18  | <i>Or-II</i>             | HN-like   | A |
| W0145 | -                   | <i>O. rufipogon</i> | Thailand              | 13.72 | 100.48 | <i>Or-II</i>             | HN-like   | A |
| W0149 | -                   | <i>O. rufipogon</i> | India                 | 23.48 | 81.10  | <i>Or-III</i>            | HN-like   | A |
| W0151 | -                   | <i>O. rufipogon</i> | India                 | 23.48 | 81.10  | <i>Or-I</i>              | HN-like   | A |
| W0157 | -                   | <i>O. rufipogon</i> | India                 | 26.59 | 94.19  | <i>Or-II</i>             | HN-like   | a |
| W0170 | -                   | <i>O. rufipogon</i> | Thailand              | 15.87 | 100.99 | <i>Or-I</i>              | HN-like   | A |
| W0179 | -                   | <i>O. rufipogon</i> | Thailand              | 17.42 | 102.78 | <i>Or-I</i>              | HN-like   | A |
| W0576 | -                   | <i>O. rufipogon</i> | Malaya                | 5.80  | 102.38 | <i>Or-II</i>             | HN-like   | a |
| W0587 | -                   | <i>O. rufipogon</i> | Malaya                | 5.70  | 102.53 | <i>Or-II</i>             | HN-like   | A |
| W0600 | -                   | <i>O. rufipogon</i> | Malaya                | 5.14  | 102.81 | <i>Or-II</i>             | HN-like   | a |
| W0621 | -                   | <i>O. rufipogon</i> | Burma                 | 17.33 | 96.50  | <i>Or-III</i>            | HN-like   | A |
| W1102 | -                   | <i>O. rufipogon</i> | India                 | 26.20 | 92.94  | <i>Or-III</i>            | HN-like   | a |
| W1114 | -                   | <i>O. rufipogon</i> | India                 | 26.82 | 94.17  | <i>Or-III</i>            | HN-like   | a |
| W1122 | -                   | <i>O. rufipogon</i> | India                 | 26.82 | 94.17  | <i>Or-II</i>             | HN-like   | A |
| W1124 | -                   | <i>O. rufipogon</i> | India                 | 26.59 | 94.20  | <i>Or-II</i>             | HN-like   | A |
| W1126 | -                   | <i>O. rufipogon</i> | India                 | 24.86 | 92.36  | <i>Or-II</i>             | HN-like   | a |
| W1214 | -                   | <i>O. rufipogon</i> | Philippines           | 7.86  | 124.86 | <i>Or-III</i>            | HN-like   | A |
| W1230 | -                   | <i>O. rufipogon</i> | Dutch New Guinea      | -4.63 | 138.93 | <i>Or-I</i>              | HN-like   | a |
| W1236 | -                   | <i>O. rufipogon</i> | Australian New Guinea | -5.31 | 141.61 | <i>Or-II</i>             | HN-like   | A |
| W1546 | -                   | <i>O. rufipogon</i> | Thailand              | 14.50 | 100.89 | <i>Or-I</i>              | HN-like   | A |
| W1547 | -                   | <i>O. rufipogon</i> | Thailand              | 14.50 | 100.89 | <i>Or-I</i>              | HN-like   | A |
| W1550 | -                   | <i>O. rufipogon</i> | Thailand              | 18.80 | 98.66  | <i>Or-II</i>             | HN-like   | A |
| W1551 | -                   | <i>O. rufipogon</i> | Thailand              | 14.50 | 100.89 | <i>Or-I</i>              | HN-like   | A |
| W1668 | -                   | <i>O. rufipogon</i> | India                 | 18.52 | 82.46  | <i>Or-III</i>            | HN-like   | a |
| W1695 | -                   | <i>O. rufipogon</i> | Thailand              | 19.45 | 99.44  | <i>Or-I</i>              | HN-like   | A |
| W1700 | -                   | <i>O. rufipogon</i> | Thailand              | 14.30 | 100.55 | <i>Or-I</i>              | HN-like   | A |
| W1726 | -                   | <i>O. rufipogon</i> | Thailand              | 15.00 | 100.00 | <i>Or-I</i>              | HN-like   | A |
| W1727 | -                   | <i>O. rufipogon</i> | Thailand              | 15.00 | 100.00 | <i>Or-I</i>              | HN-like   | A |
| W1731 | -                   | <i>O. rufipogon</i> | India                 | 20.46 | 85.88  | <i>Or-I</i>              | HN-like   | A |
| W1742 | -                   | <i>O. rufipogon</i> | India                 | 26.92 | 75.82  | <i>Or-II</i>             | HN-like   | A |
| W1746 | -                   | <i>O. rufipogon</i> | India                 | 26.92 | 75.82  | <i>Or-III</i>            | HN-like   | A |

|       |   |                     |            |       |        |               |         |   |
|-------|---|---------------------|------------|-------|--------|---------------|---------|---|
| W1748 | - | <i>O. rufipogon</i> | India      | 26.92 | 75.82  | <i>Or-III</i> | HN-like | A |
| W1749 | - | <i>O. rufipogon</i> | India      | 18.40 | 81.68  | <i>Or-I</i>   | HN-like | A |
| W1754 | - | <i>O. rufipogon</i> | India      | 20.27 | 81.50  | <i>Or-I</i>   | HN-like | A |
| W1766 | - | <i>O. rufipogon</i> | India      | 21.25 | 81.63  | <i>Or-III</i> | HN-like | A |
| W1787 | - | <i>O. rufipogon</i> | Thailand   | 15.00 | 100.00 | <i>Or-I</i>   | HN-like | A |
| W1790 | - | <i>O. rufipogon</i> | Thailand   | 15.00 | 100.00 | <i>Or-II</i>  | HN-like | A |
| W1792 | - | <i>O. rufipogon</i> | Thailand   | 15.00 | 100.00 | <i>Or-I</i>   | HN-like | A |
| W1798 | - | <i>O. rufipogon</i> | Thailand   | 15.00 | 100.00 | <i>Or-II</i>  | HN-like | A |
| W1810 | - | <i>O. rufipogon</i> | Sri Lanka  | 6.93  | 79.95  | <i>Or-II</i>  | HN-like | A |
| W1811 | - | <i>O. rufipogon</i> | Sri Lanka  | 6.93  | 79.95  | <i>Or-III</i> | HN-like | A |
| W1825 | - | <i>O. rufipogon</i> | Bangladesh | 23.71 | 90.41  | <i>Or-I</i>   | HN-like | A |
| W1858 | - | <i>O. rufipogon</i> | Thailand   | 17.53 | 100.12 | <i>Or-II</i>  | HN-like | A |
| W1859 | - | <i>O. rufipogon</i> | Thailand   | 17.52 | 100.12 | <i>Or-II</i>  | HN-like | A |
| W1862 | - | <i>O. rufipogon</i> | Thailand   | 16.82 | 100.34 | <i>Or-II</i>  | HN-like | A |
| W1866 | - | <i>O. rufipogon</i> | Thailand   | 14.57 | 100.99 | <i>Or-I</i>   | HN-like | A |
| W1882 | - | <i>O. rufipogon</i> | Thailand   | 17.03 | 102.91 | <i>Or-II</i>  | HN-like | A |
| W1891 | - | <i>O. rufipogon</i> | Thailand   | 17.85 | 102.75 | <i>Or-II</i>  | HN-like | A |
| W1893 | - | <i>O. rufipogon</i> | Thailand   | 17.35 | 102.89 | <i>Or-I</i>   | HN-like | A |
| W1895 | - | <i>O. rufipogon</i> | Thailand   | 17.25 | 104.18 | <i>Or-II</i>  | HN-like | A |
| W1896 | - | <i>O. rufipogon</i> | Thailand   | 17.25 | 104.18 | <i>Or-II</i>  | HN-like | A |
| W1916 | - | <i>O. rufipogon</i> | Thailand   | 14.92 | 103.51 | <i>Or-II</i>  | HN-like | A |
| W1919 | - | <i>O. rufipogon</i> | Thailand   | 14.73 | 102.19 | <i>Or-II</i>  | HN-like | A |
| W1927 | - | <i>O. rufipogon</i> | Thailand   | 15.46 | 100.13 | <i>Or-II</i>  | HN-like | A |
| W1972 | - | <i>O. rufipogon</i> | Indonesia  | -6.40 | 106.82 | <i>Or-II</i>  | HN-like | A |
| W1973 | - | <i>O. rufipogon</i> | Indonesia  | -6.40 | 106.82 | <i>Or-III</i> | HN-like | A |
| W1977 | - | <i>O. rufipogon</i> | Indonesia  | -6.40 | 106.82 | <i>Or-II</i>  | HN-like | A |
| W2005 | - | <i>O. rufipogon</i> | India      | 15.35 | 74.20  | <i>Or-III</i> | HN-like | A |
| W2022 | - | <i>O. rufipogon</i> | Indonesia  | 3.29  | 117.00 | <i>Or-II</i>  | HN-like | A |
| W2025 | - | <i>O. rufipogon</i> | Indonesia  | 3.29  | 117.00 | <i>Or-II</i>  | HN-like | A |
| W2030 | - | <i>O. rufipogon</i> | Indonesia  | -3.00 | 105.00 | <i>Or-II</i>  | HN-like | A |
| W2036 | - | <i>O. rufipogon</i> | Burma      | 17.33 | 96.50  | <i>Or-III</i> | HN-like | A |
| W2055 | - | <i>O. rufipogon</i> | Bangladesh | 24.48 | 91.78  | <i>Or-II</i>  | HN-like | A |
| W2056 | - | <i>O. rufipogon</i> | Bangladesh | 24.48 | 91.78  | <i>Or-II</i>  | HN-like | A |
| W2066 | - | <i>O. rufipogon</i> | Nepal      | 28.60 | 81.60  | <i>Or-III</i> | HN-like | A |
| W2197 | - | <i>O. rufipogon</i> | Indonesia  | 3.29  | 117.00 | <i>Or-II</i>  | HN-like | A |
| W2263 | - | <i>O. rufipogon</i> | Cambodia   | 11.33 | 104.50 | <i>Or-I</i>   | HN-like | A |
| W2266 | - | <i>O. rufipogon</i> | Laos       | 18.01 | 102.39 | <i>Or-II</i>  | HN-like | A |
| W2268 | - | <i>O. rufipogon</i> | Thailand   | 14.35 | 101.00 | <i>Or-I</i>   | HN-like | A |
| W2275 | - | <i>O. rufipogon</i> | Thailand   | 16.09 | 100.37 | <i>Or-I</i>   | HN-like | A |
| W2277 | - | <i>O. rufipogon</i> | Thailand   | 15.13 | 100.12 | <i>Or-I</i>   | HN-like | A |
| W2278 | - | <i>O. rufipogon</i> | Thailand   | 14.30 | 100.31 | <i>Or-I</i>   | HN-like | A |
| W2296 | - | <i>O. rufipogon</i> | Cambodia   | 11.32 | 104.50 | <i>Or-I</i>   | HN-like | A |
| W2298 | - | <i>O. rufipogon</i> | Laos       | 15.09 | 105.46 | <i>Or-I</i>   | HN-like | A |
| W2299 | - | <i>O. rufipogon</i> | Laos       | 15.09 | 105.46 | <i>Or-I</i>   | HN-like | A |
| W2302 | - | <i>O. rufipogon</i> | Laos       | 15.12 | 105.43 | <i>Or-I</i>   | HN-like | A |
| W2304 | - | <i>O. rufipogon</i> | Laos       | 15.03 | 105.54 | <i>Or-I</i>   | HN-like | A |
| W2305 | - | <i>O. rufipogon</i> | Laos       | 14.50 | 105.50 | <i>Or-I</i>   | HN-like | A |
| W2306 | - | <i>O. rufipogon</i> | Laos       | 14.50 | 105.50 | <i>Or-I</i>   | HN-like | A |
| W2311 | - | <i>O. rufipogon</i> | Laos       | 17.52 | 102.36 | <i>Or-II</i>  | HN-like | A |
| W2321 | - | <i>O. rufipogon</i> | Vietnam    | 10.44 | 105.37 | <i>Or-II</i>  | HN-like | A |
| W2327 | - | <i>O. rufipogon</i> | Vietnam    | 10.00 | 105.45 | <i>Or-II</i>  | HN-like | a |
| W2332 | - | <i>O. rufipogon</i> | Vietnam    | 21.03 | 105.85 | <i>Or-I</i>   | HN-like | A |
| W3002 | - | <i>O. rufipogon</i> | China      | 22.19 | 112.31 | <i>Or-III</i> | HN-like | A |
| W3012 | - | <i>O. rufipogon</i> | China      | 23.12 | 113.26 | <i>Or-III</i> | HN-like | A |
| W3017 | - | <i>O. rufipogon</i> | China      | 23.05 | 113.75 | <i>Or-III</i> | HN-like | A |

|       |                          |                     |             |       |        |                   |         |   |
|-------|--------------------------|---------------------|-------------|-------|--------|-------------------|---------|---|
| W3033 | -                        | <i>O. rufipogon</i> | China       | 22.28 | 109.97 | <i>Or-III</i>     | HN-like | A |
| W3035 | -                        | <i>O. rufipogon</i> | China       | 22.63 | 110.14 | <i>Or-III</i>     | HN-like | A |
| W3045 | -                        | <i>O. rufipogon</i> | China       | 22.69 | 109.27 | <i>Or-III</i>     | HN-like | A |
| W3046 | -                        | <i>O. rufipogon</i> | China       | 22.69 | 109.27 | <i>Or-III</i>     | HN-like | A |
| W3049 | -                        | <i>O. rufipogon</i> | China       | 23.90 | 106.61 | <i>Or-III</i>     | HN-like | A |
| W3051 | -                        | <i>O. rufipogon</i> | China       | 23.90 | 106.61 | <i>Or-III</i>     | HN-like | A |
| W3052 | -                        | <i>O. rufipogon</i> | China       | 23.73 | 106.91 | <i>Or-III</i>     | HN-like | A |
| W3069 | -                        | <i>O. rufipogon</i> | China       | 18.65 | 109.80 | <i>Or-III</i>     | HN-like | A |
| W3070 | -                        | <i>O. rufipogon</i> | China       | 18.65 | 109.80 | <i>Or-III</i>     | HN-like | A |
| W3071 | -                        | <i>O. rufipogon</i> | China       | 19.62 | 110.70 | <i>Or-III</i>     | HN-like | A |
| GP1   | Rata 31-2<br>(Acc.29388) | <i>O. sativa</i>    | Bengal      | NA    | NA     | <i>intermedia</i> | NB-like | A |
| GP260 | Basmati                  | <i>O. sativa</i>    | India       | NA    | NA     | <i>indica</i>     | NB-like | A |
| GP34  | Colombo                  | <i>O. sativa</i>    | India       | NA    | NA     | <i>aus</i>        | NB-like | A |
| GP36  | DV 86                    | <i>O. sativa</i>    | Bengal      | NA    | NA     | <i>aus</i>        | NB-like | A |
| GP43  | Bo Assam                 | <i>O. sativa</i>    | India       | NA    | NA     | <i>indica</i>     | NB-like | A |
| GP44  | Eei-eciet                | <i>O. sativa</i>    | India       | NA    | NA     | <i>intermedia</i> | NB-like | A |
| GP515 | Sipde-k                  | <i>O. sativa</i>    | Philippine  | NA    | NA     | <i>tropical</i>   | NB-like | a |
| GP524 | Buyagaw                  | <i>O. sativa</i>    | Philippine  | NA    | NA     | <i>japonica</i>   | NB-like | a |
| GP532 | Catatao                  | <i>O. sativa</i>    | Brazil      | NA    | NA     | <i>intermedia</i> | NB-like | A |
| GP542 | BJ1                      | <i>O. sativa</i>    | Philippine  | NA    | NA     | <i>tropical</i>   | NB-like | A |
| GP627 | Baladewa                 | <i>O. sativa</i>    | Indonesia   | NA    | NA     | <i>japonica</i>   | NB-like | A |
| GP645 | Rathu Heenati            | <i>O. sativa</i>    | Sri Lanka   | NA    | NA     | <i>aus</i>        | NB-like | A |
| GP729 | IRAT 4217                | <i>O. sativa</i>    | Ivory Coast | NA    | NA     | <i>intermedia</i> | NB-like | a |
| GP737 | ITA 218                  | <i>O. sativa</i>    | Nigeria     | NA    | NA     | <i>tropical</i>   | NB-like | A |
| GP770 | WEED RICE 26             | <i>O. sativa</i>    | North Korea | NA    | NA     | <i>japonica</i>   | NB-like | a |
| GP776 | BEO DUL BYEO             | <i>O. sativa</i>    | South Korea | NA    | NA     | <i>intermedia</i> | NB-like | A |
| GP809 | Zhongbu-M53              | <i>O. sativa</i>    | Japan       | NA    | NA     | <i>temperate</i>  | NB-like | A |
| HP143 | Langxihongken            | <i>O. sativa</i>    | China       | 31.14 | 119.17 | <i>japonica</i>   | NB-like | A |
| HP198 | Jiankenuo                | <i>O. sativa</i>    | China       | 27.34 | 117.48 | <i>indica</i>     | NB-like | A |
| HP202 | Haiwu                    | <i>O. sativa</i>    | China       | 23.73 | 117.16 | <i>indica</i>     | NB-like | A |
| HP246 | Nantianzhan              | <i>O. sativa</i>    | China       | 29.54 | 114.04 | <i>indica</i>     | NB-like | A |
| HP390 | Dongying-8               | <i>O. sativa</i>    | China       | 23.08 | 113.14 | <i>indica</i>     | NB-like | a |
| HP41  | Xuanhuangnuo             | <i>O. sativa</i>    | China       | 26.37 | 110.30 | <i>temperate</i>  | NB-like | a |
| HP547 | Jiaozhan                 | <i>O. sativa</i>    | China       | 23.38 | 110.07 | <i>japonica</i>   | NB-like | A |
| HP594 | Haoxiang                 | <i>O. sativa</i>    | China       | 26.35 | 106.42 | <i>indica</i>     | NB-like | A |
| HP63  | Zhongjiaohuang<br>mang   | <i>O. sativa</i>    | China       | 25.51 | 103.79 | <i>intermedia</i> | NB-like | a |
| HP95  | Hongjian                 | <i>O. sativa</i>    | China       | 42.52 | 129.00 | <i>intermedia</i> | NB-like | A |
| HP97  | Jinggou                  | <i>O. sativa</i>    | China       | 34.79 | 116.57 | <i>temperate</i>  | NB-like | A |
| HP99  | Zhilishui                | <i>O. sativa</i>    | China       | 42.33 | 127.27 | <i>japonica</i>   | NB-like | A |
| W0103 | -                        | <i>O. rufipogon</i> | India       | 20.48 | 85.85  | <i>temperate</i>  | NB-like | A |
| W0107 | -                        | <i>O. rufipogon</i> | India       | 20.95 | 85.10  | <i>japonica</i>   | NB-like | A |
| W0123 | -                        | <i>O. rufipogon</i> | India       | 20.46 | 85.93  | <i>temperate</i>  | NB-like | a |
| W0125 | -                        | <i>O. rufipogon</i> | India       | 21.00 | 85.10  | <i>japonica</i>   | NB-like | A |
| W0126 | -                        | <i>O. rufipogon</i> | India       | 21.00 | 85.10  | <i>Or-III</i>     | NB-like | A |
| W0133 | -                        | <i>O. rufipogon</i> | India       | 17.05 | 82.18  | <i>Or-III</i>     | NB-like | A |
| W0134 | -                        | <i>O. rufipogon</i> | India       | 16.93 | 81.88  | <i>Or-III</i>     | NB-like | A |
| W0136 | -                        | <i>O. rufipogon</i> | India       | 16.91 | 81.82  | <i>Or-III</i>     | NB-like | A |
| W0137 | -                        | <i>O. rufipogon</i> | India       | 16.91 | 81.82  | <i>Or-III</i>     | NB-like | A |
| W0144 | -                        | <i>O. rufipogon</i> | Sri Lanka   | 7.07  | 80.30  | <i>Or-I</i>       | NB-like | A |
| W0148 | -                        | <i>O. rufipogon</i> | India       | 20.48 | 85.85  | <i>Or-I</i>       | NB-like | A |

|       |   |                     |                  |       |        |               |         |   |
|-------|---|---------------------|------------------|-------|--------|---------------|---------|---|
| W0172 | - | <i>O. rufipogon</i> | Thailand         | 15.87 | 100.99 | <i>Or-III</i> | NB-like | A |
| W0549 | - | <i>O. rufipogon</i> | India            | 13.00 | 77.60  | <i>Or-III</i> | NB-like | A |
| W0589 | - | <i>O. rufipogon</i> | Malaya           | 5.70  | 102.53 | <i>Or-I</i>   | NB-like | A |
| W0593 | - | <i>O. rufipogon</i> | Malaya           | 3.14  | 101.69 | <i>Or-III</i> | NB-like | A |
| W1083 | - | <i>O. rufipogon</i> | India            | 27.00 | 88.40  | <i>Or-I</i>   | NB-like | A |
| W1111 | - | <i>O. rufipogon</i> | India            | 26.82 | 94.17  | <i>Or-I</i>   | NB-like | A |
| W1112 | - | <i>O. rufipogon</i> | India            | 26.82 | 94.17  | <i>Or-I</i>   | NB-like | A |
| W1119 | - | <i>O. rufipogon</i> | India            | 26.82 | 94.17  | <i>Or-III</i> | NB-like | A |
| W1142 | - | <i>O. rufipogon</i> | India            | 20.46 | 85.93  | <i>Or-I</i>   | NB-like | A |
| W1143 | - | <i>O. rufipogon</i> | India            | 20.46 | 85.93  | <i>Or-I</i>   | NB-like | A |
| W1238 | - | <i>O. rufipogon</i> | Neth. New Guinea | -4.63 | 138.93 | <i>Or-III</i> | NB-like | A |
| W1542 | - | <i>O. rufipogon</i> | Malaya           | 3.14  | 101.69 | <i>Or-III</i> | NB-like | a |
| W1679 | - | <i>O. rufipogon</i> | India            | 20.29 | 86.01  | <i>Or-I</i>   | NB-like | A |
| W1732 | - | <i>O. rufipogon</i> | India            | 19.50 | 84.81  | <i>Or-III</i> | NB-like | A |
| W1735 | - | <i>O. rufipogon</i> | India            | 26.92 | 75.82  | <i>Or-I</i>   | NB-like | A |
| W1738 | - | <i>O. rufipogon</i> | India            | 26.92 | 75.82  | <i>Or-I</i>   | NB-like | A |
| W1740 | - | <i>O. rufipogon</i> | India            | 26.92 | 75.82  | <i>Or-I</i>   | NB-like | A |
| W1743 | - | <i>O. rufipogon</i> | India            | 26.92 | 75.82  | <i>Or-I</i>   | NB-like | A |
| W1747 | - | <i>O. rufipogon</i> | India            | 26.92 | 75.82  | <i>Or-I</i>   | NB-like | A |
| W1750 | - | <i>O. rufipogon</i> | India            | 18.40 | 81.68  | <i>Or-I</i>   | NB-like | A |
| W1753 | - | <i>O. rufipogon</i> | India            | 18.40 | 81.68  | <i>Or-I</i>   | NB-like | A |
| W1757 | - | <i>O. rufipogon</i> | India            | 20.27 | 81.50  | <i>Or-I</i>   | NB-like | A |
| W1770 | - | <i>O. rufipogon</i> | India            | 21.18 | 81.36  | <i>Or-I</i>   | NB-like | A |
| W1777 | - | <i>O. rufipogon</i> | India            | 19.95 | 79.30  | <i>Or-III</i> | NB-like | A |
| W1782 | - | <i>O. rufipogon</i> | India            | 12.31 | 76.64  | <i>Or-III</i> | NB-like | A |
| W1788 | - | <i>O. rufipogon</i> | Thailand         | 15.00 | 100.00 | <i>Or-I</i>   | NB-like | A |
| W1795 | - | <i>O. rufipogon</i> | Thailand         | 15.00 | 100.00 | <i>Or-I</i>   | NB-like | A |
| W1802 | - | <i>O. rufipogon</i> | Bangladesh       | 23.71 | 90.41  | <i>Or-I</i>   | NB-like | A |
| W1819 | - | <i>O. rufipogon</i> | Bangladesh       | 23.71 | 90.41  | <i>Or-I</i>   | NB-like | A |
| W1821 | - | <i>O. rufipogon</i> | Bangladesh       | 23.71 | 90.41  | <i>Or-I</i>   | NB-like | A |
| W1822 | - | <i>O. rufipogon</i> | Bangladesh       | 23.71 | 90.41  | <i>Or-I</i>   | NB-like | A |
| W1823 | - | <i>O. rufipogon</i> | Bangladesh       | 23.71 | 90.41  | <i>Or-I</i>   | NB-like | A |
| W1853 | - | <i>O. rufipogon</i> | Thailand         | 19.75 | 99.73  | <i>Or-I</i>   | NB-like | A |
| W1854 | - | <i>O. rufipogon</i> | Thailand         | 19.64 | 99.52  | <i>Or-II</i>  | NB-like | A |
| W1857 | - | <i>O. rufipogon</i> | Thailand         | 18.35 | 99.53  | <i>Or-II</i>  | NB-like | A |
| W1870 | - | <i>O. rufipogon</i> | Thailand         | 15.23 | 102.50 | <i>Or-II</i>  | NB-like | A |
| W1890 | - | <i>O. rufipogon</i> | Thailand         | 17.85 | 102.75 | <i>Or-II</i>  | NB-like | A |
| W1939 | - | <i>O. rufipogon</i> | Thailand         | 8.54  | 99.73  | <i>Or-II</i>  | NB-like | A |
| W1940 | - | <i>O. rufipogon</i> | Thailand         | 14.92 | 103.51 | <i>Or-II</i>  | NB-like | A |
| W1945 | - | <i>O. rufipogon</i> | China            | NA    | NA     | <i>Or-III</i> | NB-like | A |
| W1952 | - | <i>O. rufipogon</i> | China            | NA    | NA     | <i>Or-III</i> | NB-like | A |
| W1963 | - | <i>O. rufipogon</i> | China            | NA    | NA     | <i>Or-III</i> | NB-like | A |
| W1976 | - | <i>O. rufipogon</i> | Indonesia        | -6.40 | 106.82 | <i>Or-II</i>  | NB-like | A |
| W1978 | - | <i>O. rufipogon</i> | Indonesia        | -6.40 | 106.82 | <i>Or-II</i>  | NB-like | A |
| W1983 | - | <i>O. rufipogon</i> | India            | 18.50 | 73.15  | <i>Or-I</i>   | NB-like | A |
| W1989 | - | <i>O. rufipogon</i> | India            | 20.30 | 73.00  | <i>Or-III</i> | NB-like | A |
| W1990 | - | <i>O. rufipogon</i> | India            | 23.10 | 72.45  | <i>Or-III</i> | NB-like | A |
| W1991 | - | <i>O. rufipogon</i> | India            | 22.30 | 71.05  | <i>Or-III</i> | NB-like | A |
| W1998 | - | <i>O. rufipogon</i> | India            | 22.20 | 73.20  | <i>Or-III</i> | NB-like | A |
| W2003 | - | <i>O. rufipogon</i> | India            | 15.30 | 73.50  | <i>Or-III</i> | NB-like | A |
| W2007 | - | <i>O. rufipogon</i> | India            | 16.00 | 74.30  | <i>Or-III</i> | NB-like | A |
| W2010 | - | <i>O. rufipogon</i> | India            | 19.00 | 73.06  | <i>Or-III</i> | NB-like | A |
| W2014 | - | <i>O. rufipogon</i> | India            | 20.18 | 72.55  | <i>Or-III</i> | NB-like | A |
| W2050 | - | <i>O. rufipogon</i> | Bangladesh       | 23.71 | 90.41  | <i>Or-II</i>  | NB-like | A |
| W2051 | - | <i>O. rufipogon</i> | Bangladesh       | 23.71 | 90.41  | <i>Or-II</i>  | NB-like | A |



|       |              |                     |             |       |        |               |         |          |
|-------|--------------|---------------------|-------------|-------|--------|---------------|---------|----------|
| W2052 | -            | <i>O. rufipogon</i> | Bangladesh  | 23.71 | 90.41  | <i>Or-II</i>  | NB-like | A        |
| W2064 | -            | <i>O. rufipogon</i> | Bangladesh  | 22.82 | 89.55  | <i>Or-I</i>   | NB-like | A        |
| W2198 | -            | <i>O. rufipogon</i> | China       | NA    | NA     | <i>Or-III</i> | NB-like | A        |
| W2272 | -            | <i>O. rufipogon</i> | Thailand    | 16.21 | 102.48 | <i>Or-II</i>  | NB-like | A        |
| W2322 | -            | <i>O. rufipogon</i> | Vietnam     | 10.45 | 105.32 | <i>Or-II</i>  | NB-like | A        |
| W3010 | -            | <i>O. rufipogon</i> | China       | 23.17 | 112.89 | <i>Or-III</i> | NB-like | A        |
| W3013 | -            | <i>O. rufipogon</i> | China       | 23.12 | 113.26 | <i>Or-III</i> | NB-like | A        |
| W3014 | -            | <i>O. rufipogon</i> | China       | 23.29 | 113.83 | <i>Or-III</i> | NB-like | A        |
| W3015 | -            | <i>O. rufipogon</i> | China       | 23.29 | 113.83 | <i>Or-III</i> | NB-like | A        |
| W3016 | -            | <i>O. rufipogon</i> | China       | 23.05 | 113.75 | <i>Or-III</i> | NB-like | A        |
| W3018 | -            | <i>O. rufipogon</i> | China       | 22.80 | 114.46 | <i>Or-III</i> | NB-like | A        |
| W3023 | -            | <i>O. rufipogon</i> | China       | 23.72 | 113.02 | <i>Or-III</i> | NB-like | A        |
| W3027 | -            | <i>O. rufipogon</i> | China       | 21.95 | 108.61 | <i>Or-III</i> | NB-like | A        |
| W3030 | -            | <i>O. rufipogon</i> | China       | 21.80 | 109.19 | <i>Or-III</i> | NB-like | A        |
| W3031 | -            | <i>O. rufipogon</i> | China       | 21.77 | 108.36 | <i>Or-III</i> | NB-like | A        |
| W3032 | -            | <i>O. rufipogon</i> | China       | 21.77 | 108.36 | <i>Or-III</i> | NB-like | A        |
| W3034 | -            | <i>O. rufipogon</i> | China       | 22.28 | 109.97 | <i>Or-III</i> | NB-like | A        |
| W3039 | -            | <i>O. rufipogon</i> | China       | 23.39 | 110.07 | <i>Or-III</i> | NB-like | A        |
| W3044 | -            | <i>O. rufipogon</i> | China       | 23.17 | 108.28 | <i>Or-III</i> | NB-like | A        |
| W3050 | -            | <i>O. rufipogon</i> | China       | 23.90 | 106.61 | <i>Or-III</i> | NB-like | A        |
| W3053 | -            | <i>O. rufipogon</i> | China       | 19.10 | 110.35 | <i>Or-III</i> | NB-like | A        |
| W3054 | -            | <i>O. rufipogon</i> | China       | 19.10 | 110.35 | <i>Or-III</i> | NB-like | A        |
| W3055 | -            | <i>O. rufipogon</i> | China       | 19.10 | 110.35 | <i>Or-III</i> | NB-like | A        |
| W3064 | -            | <i>O. rufipogon</i> | China       | 19.25 | 110.46 | <i>Or-III</i> | NB-like | A        |
| W3065 | -            | <i>O. rufipogon</i> | China       | 19.25 | 110.46 | <i>Or-III</i> | NB-like | A        |
| W3073 | -            | <i>O. rufipogon</i> | China       | 19.62 | 110.70 | <i>Or-III</i> | NB-like | A        |
| W3077 | -            | <i>O. rufipogon</i> | China       | 28.23 | 116.61 | <i>Or-III</i> | NB-like | A        |
| W3078 | -            | <i>O. rufipogon</i> | China       | 28.23 | 116.61 | <i>Or-III</i> | NB-like | A        |
| W3079 | -            | <i>O. rufipogon</i> | China       | 28.23 | 116.61 | <i>Or-III</i> | NB-like | A        |
| W3080 | -            | <i>O. rufipogon</i> | China       | 28.23 | 116.61 | <i>Or-III</i> | NB-like | A        |
| W3082 | -            | <i>O. rufipogon</i> | China       | 28.23 | 116.61 | <i>Or-III</i> | NB-like | A        |
| W3092 | -            | <i>O. rufipogon</i> | China       | 26.80 | 113.55 | <i>Or-III</i> | NB-like | A        |
| W3094 | -            | <i>O. rufipogon</i> | China       | 25.28 | 111.34 | <i>Or-III</i> | NB-like | A        |
| W3096 | -            | <i>O. rufipogon</i> | China       | 25.28 | 111.34 | <i>Or-III</i> | NB-like | A        |
| W3105 | -            | <i>O. rufipogon</i> | India       | NA    | NA     | <i>Or-I</i>   | NB-like | A        |
| GP24  | IR 3941-25-1 | <i>O. sativa</i>    | IRRI        | NA    | NA     | <i>indica</i> | NB-like | <b>T</b> |
| GP716 | SUWEON326    | <i>O. sativa</i>    | North Korea | NA    | NA     | <i>indica</i> | NB-like | <b>T</b> |
| GP767 | SUWEON259    | <i>O. sativa</i>    | North Korea | NA    | NA     | <i>indica</i> | NB-like | <b>T</b> |
| HP176 | Shanlinwan   | <i>O. sativa</i>    | China       | 27.57 | 119.70 | <i>indica</i> | NB-like | <b>T</b> |
| HP249 | Guizhounuo   | <i>O. sativa</i>    | China       | 29.64 | 109.42 | <i>indica</i> | NB-like | <b>T</b> |
| W0166 | -            | <i>O. rufipogon</i> | Thailand    | 18.81 | 98.66  | <i>Or-II</i>  | other   | A        |
| W0169 | -            | <i>O. rufipogon</i> | Thailand    | 15.87 | 100.99 | <i>Or-II</i>  | other   | A        |
| W0610 | -            | <i>O. rufipogon</i> | Burma       | 16.80 | 96.15  | <i>Or-I</i>   | other   | A        |
| W0624 | -            | <i>O. rufipogon</i> | Burma       | 19.77 | 96.11  | <i>Or-II</i>  | other   | A        |
| W1244 | -            | <i>O. rufipogon</i> | Nepal       | 27.70 | 85.32  | <i>Or-III</i> | other   | A        |
| W1534 | -            | <i>O. rufipogon</i> | India       | 28.64 | 77.23  | <i>Or-III</i> | other   | a        |
| W1536 | -            | <i>O. rufipogon</i> | Sri Lanka   | 8.03  | 79.84  | <i>Or-III</i> | other   | a        |
| W1557 | -            | <i>O. rufipogon</i> | Thailand    | 14.54 | 99.99  | <i>Or-II</i>  | other   | A        |
| W1558 | -            | <i>O. rufipogon</i> | Thailand    | 15.20 | 104.90 | <i>Or-II</i>  | other   | A        |
| W1560 | -            | <i>O. rufipogon</i> | Thailand    | 14.03 | 100.37 | <i>Or-III</i> | other   | A        |
| W1681 | -            | <i>O. rufipogon</i> | India       | 20.09 | 84.45  | <i>Or-I</i>   | other   | A        |
| W1715 | -            | <i>O. rufipogon</i> | China       | NA    | NA     | <i>Or-II</i>  | other   | a        |
| W1759 | -            | <i>O. rufipogon</i> | India       | 20.27 | 81.50  | <i>Or-III</i> | other   | A        |
| W1780 | -            | <i>O. rufipogon</i> | India       | 17.00 | 81.80  | <i>Or-II</i>  | other   | A        |
| W1804 | -            | <i>O. rufipogon</i> | Sri Lanka   | 6.93  | 79.95  | <i>Or-II</i>  | other   | A        |

|       |   |                     |            |       |        |               |       |          |
|-------|---|---------------------|------------|-------|--------|---------------|-------|----------|
| W1818 | - | <i>O. rufipogon</i> | Bangladesh | 23.71 | 90.41  | <i>Or-I</i>   | other | A        |
| W1849 | - | <i>O. rufipogon</i> | Thailand   | 19.56 | 99.70  | <i>Or-II</i>  | other | A        |
| W1865 | - | <i>O. rufipogon</i> | Thailand   | 14.56 | 100.98 | <i>Or-I</i>   | other | A        |
| W1925 | - | <i>O. rufipogon</i> | Thailand   | 15.55 | 100.12 | <i>Or-I</i>   | other | A        |
| W1981 | - | <i>O. rufipogon</i> | Indonesia  | -2.99 | 104.76 | <i>Or-II</i>  | other | a        |
| W2021 | - | <i>O. rufipogon</i> | Indonesia  | 3.29  | 117.00 | <i>Or-II</i>  | other | A        |
| W2024 | - | <i>O. rufipogon</i> | Indonesia  | 3.29  | 117.00 | <i>Or-II</i>  | other | A        |
| W2276 | - | <i>O. rufipogon</i> | Thailand   | 16.49 | 100.21 | <i>Or-II</i>  | other | a        |
| W2288 | - | <i>O. rufipogon</i> | Cambodia   | 11.04 | 106.09 | <i>Or-II</i>  | other | A        |
| W2307 | - | <i>O. rufipogon</i> | Laos       | 14.52 | 105.52 | <i>Or-I</i>   | other | A        |
| W3007 | - | <i>O. rufipogon</i> | China      | 22.38 | 112.69 | <i>Or-III</i> | other | A        |
| W3025 | - | <i>O. rufipogon</i> | China      | 23.72 | 113.02 | <i>Or-III</i> | other | a        |
| W3040 | - | <i>O. rufipogon</i> | China      | 23.39 | 110.07 | <i>Or-III</i> | other | A        |
| W3059 | - | <i>O. rufipogon</i> | China      | 19.10 | 109.00 | <i>Or-III</i> | other | A        |
| W3062 | - | <i>O. rufipogon</i> | China      | 19.10 | 109.00 | <i>Or-III</i> | other | A        |
| W3063 | - | <i>O. rufipogon</i> | China      | 19.10 | 109.00 | <i>Or-III</i> | other | a        |
| W3066 | - | <i>O. rufipogon</i> | China      | 18.75 | 109.17 | <i>Or-III</i> | other | A        |
| W3084 | - | <i>O. rufipogon</i> | China      | 22.10 | 100.79 | <i>Or-II</i>  | other | A        |
| W3085 | - | <i>O. rufipogon</i> | China      | 23.60 | 102.01 | <i>Or-III</i> | other | A        |
| W3086 | - | <i>O. rufipogon</i> | China      | 23.60 | 102.01 | <i>Or-III</i> | other | a        |
| W3087 | - | <i>O. rufipogon</i> | China      | 23.60 | 102.01 | <i>Or-III</i> | other | a        |
| W3088 | - | <i>O. rufipogon</i> | China      | 23.60 | 102.01 | <i>Or-III</i> | other | a        |
| W3019 | - | <i>O. rufipogon</i> | China      | 22.80 | 114.46 | <i>Or-III</i> | other | <b>T</b> |

**Supplementary Table 6.** The molecular marker primers and primers for molecular analysis.***Hwi2* fine mapping**

| Marker     | Faward (5'-3')         | Reverse (5'-3')        | restriction enzyme |
|------------|------------------------|------------------------|--------------------|
| xyy1       | GTAATCTCGTCTGCCCTCGC   | TAAACTAATCAAGAACCTGTCC | -                  |
| xyy6       | AACACCAGTTTTTCAGAGGCT  | CCCACCTATTCATGCAAGTT   | -                  |
| xyy9       | CCTCTTGCCATTGCTCGG     | TCCACTTGCCACTCCAAA     | -                  |
| xyy10      | GTCCCAGGCGAGCCTTGAC    | CTTCCGCTGCTCCGTTGCT    | -                  |
| xyy-caps12 | CCTGAGAATGAAATCACTAATT | CTGACTTATTGCTGGAGTATTC | <i>Hinf</i> I      |
| xyy-caps23 | CAGAGAAAGAATTGCATCCACA | GCTCACAATGTAGCAACCTCAC | <i>Hind</i> III    |
| xyy-caps25 | ATCAAACCGTCGCGATAGAG   | CGCCTCTTTCTTTTCTCCTTCT | <i>Hha</i> I       |

**Real-time PCR**

| Gene            | Faward (5'-3')           | Reverse (5'-3')           |
|-----------------|--------------------------|---------------------------|
| <i>PBZ1</i>     | TACACCATGAAGCTTAACCCTGCC | TCGAGCACATCCGACTTTAGGACA  |
| <i>PR4</i>      | AGTATGGATGGACCGCCTTCTGT  | CTCGCAATTATTGTCGCACCTGTTC |
| <i>PR1a</i>     | GGTATCCTGCTGCTTGCTGGT    | GTTGTGCGGGTCCACGAAGT      |
| <i>PR1b</i>     | GGCAACTTCGTCGGACAGA      | CCGTGGACCTGTTTACATTTTCA   |
| <i>JIOsPR10</i> | CCGGACGCTTACAATAAATCG    | CACTTCTCAATCACTGCTTGGAA   |
| <i>25L1</i>     | GAAGTATCCAGGACATCTTTCGG  | TTGAAACTTGACCACCCATGGCAC  |
| <i>25L2</i>     | ATTGCTCCAGAATGCTCAGAGGGT | CATGTCATCAGTTGGCCTTCTTCG  |
| <i>290</i>      | AACATGGCTTCTCAGGCTTTGCAG | TGGTTGGTAGTTCAGTCCGAGGAA  |

**Complementation test**

| Fragment | Faward (5'-3')                  | Reverse (5'-3')            |
|----------|---------------------------------|----------------------------|
| 290C1    | ACATGCATGCTCCTCCGTTGTTAATTGTTAC | GGACGCTGACTCCATCTACC       |
| 290C2    | GAAGTACCAACCACCCAATAAAC         | GGGGCCAAACATGGCGACGATACGAT |

**Subcellular localization**

| Gene        | Faward (5'-3')                  | Reverse (5'-3')                  |
|-------------|---------------------------------|----------------------------------|
| <i>25L1</i> | GGACTAGTAAACGAAAGTTATCTGTACT    | CCGCTCGAGTCATCTAAGATATGACTCCCTG  |
| <i>25L2</i> | GGACTAGTAATAAAAAGTAAACACAAGCT   | ACGCGTCGACTTAGTTTTCTCTAAGATATGCA |
| <i>290</i>  | GGACTAGTATGATTCTGCACTCTCCATTTCT | ACGCGTCGACTGCAACATCCGCATAGAAA    |

***Hwi1* variation detecting**

| Marker | Faward (5'-3')       | Reverse (5'-3')         |
|--------|----------------------|-------------------------|
| Hwi1-1 | GCGTCTTGAAGTGGTAG    | GCTGTGGTGTAGGTATGC      |
| Hwi1-2 | GCTACTCAGATCACTGCTAC | ACGAGGTGGATTCTTGGA      |
| Hwi1-3 | CCAGAGGCAATCCTGAACAT | CACTGAGATTATTGAATGCGAAC |
